# Supplementary material for: Theories, models and frameworks to understand barriers to the provision of mobility-assistive technologies: a scoping review
Source: PubMed Central journal article supplement — BMJ Open. 2024 May 15;14(5):e080633. doi: 10.1136/bmjopen-2023-080633 (PMC11097887; doi:10.1136/bmjopen-2023-080633), 2024-05-15
Supplement: bmjopen-2023-080633.draft_revisions.pdf [file bmjopen-2023-080633.draft_revisions.pdf]

# BMJ Open

BMJ Open is committed to open peer review. As part of this commitment we make the peer review history of every article we publish publicly available.

When an article is published we post the peer reviewers' comments and the authors' responses online. We also post the versions of the paper that were used during peer review. These are the versions that the peer review comments apply to.

The versions of the paper that follow are the versions that were submitted during the peer review process. They are not the versions of record or the final published versions. They should not be cited or distributed as the published version of this manuscript.

BMJ Open is an open access journal and the full, final, typeset and author-corrected version of record of the manuscript is available on our site with no access controls, subscription charges or pay-per-view fees (<http://bmjopen.bmj.com>).

If you have any questions on BMJ Open's open peer review process please email [info.bmjopen@bmj.com](mailto:info.bmjopen@bmj.com)

# BMJ Open

## Theories, models and frameworks to understand barriers to the provision of mobility assistive technologies: A scoping review

|                               |                                                                                                                                                                                                                                                                                                                                                                                                                                                                 |
|-------------------------------|-----------------------------------------------------------------------------------------------------------------------------------------------------------------------------------------------------------------------------------------------------------------------------------------------------------------------------------------------------------------------------------------------------------------------------------------------------------------|
| Journal:                      | <i>BMJ Open</i>                                                                                                                                                                                                                                                                                                                                                                                                                                                 |
| Manuscript ID                 | bmjopen-2023-080633                                                                                                                                                                                                                                                                                                                                                                                                                                             |
| Article Type:                 | Original research                                                                                                                                                                                                                                                                                                                                                                                                                                               |
| Date Submitted by the Author: | 06-Oct-2023                                                                                                                                                                                                                                                                                                                                                                                                                                                     |
| Complete List of Authors:     | Aldawood, Asma; The University of Sheffield, School of Medicine and Population Health; King Saud bin Abdulaziz University for Health Sciences, College of Applied Medical Sciences<br>Hind, Daniel; The University of Sheffield, School of Medicine and Population Health<br>Rushton, Simon; University of Sheffield, Department of Politics and International Relations<br>Field, Becky; The University of Sheffield, School of Medicine and Population Health |
| Keywords:                     | Health Services Accessibility, REHABILITATION MEDICINE, PUBLIC HEALTH, Neurological injury < NEUROLOGY                                                                                                                                                                                                                                                                                                                                                          |
|                               |                                                                                                                                                                                                                                                                                                                                                                                                                                                                 |

SCHOLARONE™  
Manuscripts

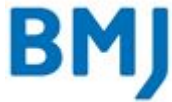

I, the Submitting Author has the right to grant and does grant on behalf of all authors of the Work (as defined in the below author licence), an exclusive licence and/or a non-exclusive licence for contributions from authors who are: i) UK Crown employees; ii) where BMJ has agreed a CC-BY licence shall apply, and/or iii) in accordance with the terms applicable for US Federal Government officers or employees acting as part of their official duties; on a worldwide, perpetual, irrevocable, royalty-free basis to BMJ Publishing Group Ltd ("BMJ") its licensees and where the relevant Journal is co-owned by BMJ to the co-owners of the Journal, to publish the Work in this journal and any other BMJ products and to exploit all rights, as set out in our [licence](#).

The Submitting Author accepts and understands that any supply made under these terms is made by BMJ to the Submitting Author unless you are acting as an employee on behalf of your employer or a postgraduate student of an affiliated institution which is paying any applicable article publishing charge ("APC") for Open Access articles. Where the Submitting Author wishes to make the Work available on an Open Access basis (and intends to pay the relevant APC), the terms of reuse of such Open Access shall be governed by a Creative Commons licence – details of these licences and which [Creative Commons](#) licence will apply to this Work are set out in our licence referred to above.

Other than as permitted in any relevant BMJ Author's Self Archiving Policies, I confirm this Work has not been accepted for publication elsewhere, is not being considered for publication elsewhere and does not duplicate material already published. I confirm all authors consent to publication of this Work and authorise the granting of this licence.

1  
2  
3 **Theories, models and frameworks to understand barriers to the provision of**  
4 **mobility assistive technologies: A scoping review**  
5  
6

7  
8 Asma Aldawood<sup>1,2\*</sup>, Daniel Hind<sup>1</sup>, Simon Rushton<sup>3</sup>, Becky Field<sup>1</sup>  
9

10  
11 *1. School of Medicine and Population Health, The University of Sheffield, Sheffield, UK*  
12

13  
14 *2. King Saud bin Abdulaziz University for Health Sciences, Riyadh, Saudi Arabia*  
15

16  
17 *3. Department of Politics and International Relations, The University of Sheffield, Sheffield, UK.*  
18  
19  
20  
21  
22  
23

24  
25 \*Corresponding author  
26

27  
28 Email: [aaldawood2@sheffield.ac.uk](mailto:aaldawood2@sheffield.ac.uk) (AA)  
29  
30  
31  
32  
33  
34  
35  
36  
37  
38  
39  
40  
41  
42  
43  
44  
45  
46  
47  
48  
49  
50  
51  
52  
53  
54  
55  
56  
57  
58  
59  
60

## Abstract

**Objectives** There is strong evidence that mobility-assistive technologies (MATs) improve occupational performance, social participation, educational and employment access, and overall quality of life in people with disabilities. However, people with disabilities still face barriers to accessing MATs. This review aims at summarising and synthesising the following: 1) theories, models, and frameworks that have been used to understand MATs access, and 2) specific determinants of access.

**Design** a Scoping review using the five-step Arksey and O'Malley Framework.

**Data sources** We searched the MEDLINE, EMBASE, and CINAHL databases for publications between 2000 and 2023. We searched for articles published up to 15 June 2023.

**Eligibility criteria** We included English-published literature in peer-reviewed journals that reported (a) barriers to the provision of MATs, (b) including at least one theory, model, or framework, and (c) between 2000 and 2023.

**Data extraction and synthesis** We extracted study characteristics, theories, models and framework usage, research recommendations, key findings on MAT barriers, and theoretical propositions. We conduct a theoretical synthesis guided by Turner's approach.

**Results** We included 15 articles using six theories, models, and frameworks that were synthesised into nine propositions. The synthesised theory emphasises that mobility is essential for human flourishing and that certain health conditions may impose restrictions on mobility. This impact can be alleviated by two direct determinants: (1) the provision of suitable services, and (2) their comprehensive provision. Policies and costs indirectly influence these services. Additionally, sociocultural and personal factors affect the use of these services. Ineffectively addressing these determinants could limit access to MAT and subsequent disabilities.

**Conclusion** Our synthetic model describes the logic of providing evidence-based MATs, and we identify the determinants of access which can act as targets for future work to improve MAT service provision.

## Strengths and limitations of this study

- This is the first scoping review synthesis of the theories, models, frameworks, and barriers to the provision of MATs. We expanded the coverage of the resulting synthesis from individual theoretical perspectives by combining propositions from different theoretical perspectives, thus improving our ability to predict the barriers encountered in accessing AT services.
- Another strength of this study is the use of determinants organised around the Consolidated Framework for Implementation Research (CFIR), which allows local implementation strategies to be tailored to different policy jurisdictions.
- The limitations of this study include the exclusion of non-English language studies, which may limit the applicability of the findings.
- Patient and public engagement could have added additional perspectives and insights to the study.

## Introduction

Neurological conditions, musculoskeletal disorders, and aging are associated with considerable humanistic burdens, including decreased quality of life (QoL)[1,2], limited social participation[3,4], fewer employment opportunities[3], and increased caregiver burden[5]. Mobility-assistive technologies (MATs) are vital for addressing the challenges posed by these conditions, as they can help improve QoL[6], promote independence[7], and alleviate the burden on individuals, families, and societies[8]. MATs include devices and systems that maintain and enhance independent mobility[9]. These include wheelchairs, walkers, scooters, prosthetic and orthopaedic devices, and exoskeletons[10].

Wheeled mobility devices, prosthetics, and orthotics are cost-effective in improving the QoL and independence of people with disabilities[11,12]. Despite being endorsed by the United Nations [13] and the World Health Organization [14] as essential for creating equitable opportunities for people with disabilities, access to these MATs remains limited[9]. There is considerable unmet need for MATs worldwide[15], with only a small percentage of those who require them having access [9].

The reasons for the unmet need for MATs are poorly understood but include the absence of national policies[14,16], high costs[17,18], and insufficiently trained personnel[18]. Several pre-existing theories, models, and frameworks (TMFs) have been used to understand the determinants of access and uptake, each with different conceptual coverage and terminology, which could help plan corrective actions. When a research area is characterised by theoretical incoherence, researchers must choose between rigid empiricism, selecting theories based on their virtues, developing their own theory, and theoretical synthesis[19]. Theoretical synthesis can amalgamate propositions from different theories in a propositional network, enabling researchers to extend the coverage, content validity, and document points of convergence[19]. Scoping reviews are ideal for uncovering key concepts and informing future research designs[20]. This paper presents a scoping review which identifies and synthesises the TMFs which have been used to understand the barriers to the provision of MATs to people with mobility issues.

## Method

We report a five-stage scoping review based on the approach outlined by Arksey and O'Malley [21] in line with the Preferred Reporting Items for Systematic Reviews and Meta-Analyses extension for Scoping Reviews (PRISMA-ScR)[22]. This study did not meet the eligibility requirements for registration using PROSPERO.

## Eligibility criteria

The research question was as follows: What theories, models, and frameworks have been used to understand the barriers to the provision of MATs to people with mobility issues? The Behaviour of interest; Health context; Exclusions; Models or Theories (BeHEMOTH) framework [23] was employed to formulate the search terms (Table 1) and eligibility criteria (Table 2).

**Table 1 Search strategy developed using the BeHEMoTh procedure on Medline**

| <b>BeHEMoTH</b> | <b>Concept</b>                       | <b>Search strategy ‘Medline via Ovid’</b>                                                                           |
|-----------------|--------------------------------------|---------------------------------------------------------------------------------------------------------------------|
| <b>Be</b>       | Barriers to Access or provision      | (Provision* adj10 (barrier* or challeng* or restrict* or obstacle* or impediment* or difficult* or issue*)). ab,ti. |
| <b>H</b>        | People with mobility issues AND MATs | Mobility Limitation/ AND Self-Help Devices                                                                          |
| <b>E</b>        | NA                                   | NA                                                                                                                  |
| <b>MoTh</b>     | Models or Theories                   | (theor* or framework* or model* or taxonom* or classifi* or concept*). ab,ti.                                       |

**Table 2 Inclusion and exclusion criteria**

| <b>Inclusion criteria</b>                                       | <b>Exclusion criteria</b>                                                                             | <b>Rationale</b>                                                                                  |
|-----------------------------------------------------------------|-------------------------------------------------------------------------------------------------------|---------------------------------------------------------------------------------------------------|
| Publications reporting on the barriers to the provision of MATs | Publication concentrates on aspects other than barriers to access, and there is no report on barriers | This review focuses on understanding barriers to the provision of MATs                            |
| Publications including at least a theory, model, or framework   | Publications that did not employ a theory, model, or framework                                        | To ensure that the articles concentrate on theory, model, or framework to understand the barriers |
| Publications in peer-reviewed journals                          | Other publications such as conference abstracts and theses                                            | To ensure that studies had undergone rigorous evaluation                                          |
| Publications published in the English language                  | Publications in other languages                                                                       | Costs and time commitment associated with article translation                                     |
| Publications between 2000 and 2023                              | Publication published before 2000                                                                     | To ensure using the most relevant publications from the previous 20 years                         |



## Information sources and Searches

Literature searches were performed by (AA) on MEDLINE (Ovid), EMBASE (Ovid), and CINAHL (EBSCO) databases for studies published from 1 January 2000 to 15 June 2023. To identify appropriate publications relevant to the research issue, a *priori* search strategy was established in collaboration with the authors (AA and DH) and an information specialist (FZ). The search terms combined the concepts of ‘barriers to provision, mobility issues, AND ‘MATs’, and a theory/model/framework’. Free text terms, subject heading, use of the Boolean operators "AND" and "OR", and truncation were all used to ensure a successful search. The final search strategy was tested on MEDLINE via Ovid, and translated into other databases. The full search strategy and results are presented in online supplemental appendix 1. We reviewed the reference lists of the included articles to identify additional relevant articles [21] but restricted eligibility to peer-reviewed studies, excluding grey literature.

## Study selection

The Rayyan platform (<https://www.rayyan.ai>) was used for the study selection. Initial title and abstract screening was conducted by (AA), with regular consultations with other reviewers (DH, SR, and BF) to resolve any discrepancies. Full-text screening involved consistent discussions between (AA, DH, SR, and BF), and the full texts of eligible articles were subsequently retrieved for a more detailed assessment.

## Data charting process

To facilitate consistent data presentation and synthesis, we charted the general and study-specific information from the studies directly into Microsoft Excel spreadsheets. Data items included country of origin, study population, aims, sample size, study design, data collection tool, TMF used, a brief description of the purpose of its use, research recommendations, and key findings related to barriers to the provision of MATs. We extracted theoretical propositions from the TMFs. We mapped the reported barriers to one of the 39 constructs of the Consolidated Framework for Implementation Research (CFIR), a synthetic framework of constructs used in 19 implementation theories[24], using a codebook (<https://cfirguide.org/tools/>). The CFIR provides a set of standardised constructs to guide researchers, creating a common language for explicitly and consistently describing the aspects that may affect the provision[25].

## Synthesis of results

Tabular summaries and narrative syntheses were completed for the included articles and their TMFs[26]. We conducted a theoretical synthesis to generate new insights that were unavailable for any TMF[27]. The synthesis was guided by Turner's [28] approach. In Step 1, the TMFs are summarised and their shared themes are identified. In Step 2, the aspects of the TMF that pertain to core concepts by extracting the phrases used, their definitions, and their explicit and implicit relationships are identified. In Step 3, the TMFs are broken into simple propositions that can be compared and tabulated. In Step 4, the theories are compared and determined how they converge or diverge by combining similar elements. In Step 5, the convergent elements from the TMF are

1  
2  
3 combined into a single conceptual model that focused on the relationships between concepts. For  
4 example, during this stage, we examined how concepts from these TMFs—such as cost, services,  
5 and activity (mobility)— interacted and influenced each other within the synthesised theory to  
6 gain theoretical insight. We incorporated statements from the studies included in this review to  
7 strengthen the synthesis and support the resulting conceptual model (Step 6).  
8  
9

## 10 **Gaps analysis**

11  
12  
13 To identify knowledge gaps and areas for future research, we reviewed the papers and tabulated  
14 explicit recommendations, which is a core function of scoping reviews[20].  
15  
16  
17

## 18 **Patients and public involvement**

19 No patients or public were involved in the study.  
20  
21  
22  
23

## 24 **Results**

### 25 **Characteristics of the studies**

26  
27  
28 The literature search yielded 200 citations after duplicates were removed. A total of 149  
29 citations were excluded after initial screening, and 51 potentially eligible articles were retrieved  
30 for full-text review. Of these, 38 were excluded because they were not reported ( $n=9$ ), TMFs  
31 were not reported ( $n=24$ ), citations were conference abstracts ( $n=4$ ) or, a thesis ( $n=1$ ). Thirteen  
32 studies identified from the databases met all eligibility criteria. After reviewing the reference lists  
33 and conducting manual searches, 23 additional studies were identified and examined for  
34 eligibility, and two studies were determined to be eligible (Figure 1)[29].  
35  
36  
37  
38  
39  
40  
41

#### 42 **Figure 1 PRISMA flow diagram.**

43  
44  
45 The final synthesis included 15 articles (online supplemental appendix 2) [30–44]. Eight  
46 studies addressed the challenges associated with the provision and use of MATs  
47 [30,31,34,36,39,41–43]. Four studies examined the environmental barriers to  
48 participation[32,37,40,44]. Two studies explored the experiences of patients and caregivers, and  
49 their rehabilitation needs[35,38]. One study sought to draw attention to inconsistencies in an  
50 assistive technologies (AT) provision schemes[33]. There were ( $n=4$ ) secondary studies and ( $n=$   
51 11) primary research studies conducted between 2012 and 2023 in South Africa[42],  
52 Mongolia[40], Canada and India[38], Australia[30,33], Malaysia[36], New Zealand[32],  
53 Uganda[39], Brazil[35], United States[34], Sweden[37], Tanzania[44], Canada, and the United  
54 States[31]. Primary research studies contained between one and 318 participants.  
55  
56  
57

Six TMFs representing various perspectives were identified. Two were biopsychosocial in orientation: the International Classification of Functioning, Disability, and Health framework (ICF) [45] and The Human Activity Assistive Technology model (HAAT)[46], which focused on AT. Another model focusing on AT is the integrated multi-intervention paradigm for the assessment and application of concurrent treatments (IMPACT<sup>2</sup>)[47]. Three other identified TMFs were applied to AT access: Levesque's theoretical framework,[48] Gibson's affordances theory,[49] and the Systemic development model (SDM)[50]. The most frequently used TMF was the ICF ( $n = 11$ ). All included studies applied one TMF, except one[33], which used two in combination - the ICF and IMPACT<sup>2</sup>. There are three distinct applications of TMFs (Table 3). The majority were used as a basis for analysis and interpretation ( $n = 10$ ), or as a guide for designing the surveys and interviews ( $n = 2$ ). In addition, TMFs were used as a comprehensive framework to provide context for reviewing relevant literature ( $n = 3$ ).

**Table 3 Theories, models, frameworks, and their purpose of application in eligible studies**

| Papers                                     | Theory/Model/Framework          | The purpose of using Theory/Model/Framework                                                                                                                                           |
|--------------------------------------------|---------------------------------|---------------------------------------------------------------------------------------------------------------------------------------------------------------------------------------|
| McIntyre, Cleland and Ramklass (2021) [42] | Levesque's conceptual framework | To analyse the data and classify the facilitators and barriers to the five components of the framework (Approachability, Acceptability, Availability, Affordability, Appropriateness) |
| Dorjbal et al. (2020) [40]                 | ICF                             | To create a topic guide for interviews based on the ICF's components (Health conditions, environmental factors, and personal factors)                                                 |
| Jindal et al. (2018) [38]                  | ICF                             | To analyse and structure the data around the components of the ICF                                                                                                                    |
| Bhidayasiri et al. (2022) [43]             | HAAT                            | To analyse and structure the data around the components of HAAT (human, the activity, and the AT)                                                                                     |
| Layton, (2012) [30]                        | ICF                             | To analyse the survey data                                                                                                                                                            |
| Mairami et al. (2017) [36]                 | Gibson's affordances theory     | To identify the ways in which affordances affect recovery and wellbeing following a stroke                                                                                            |

|                                               |                             |                                                                                                                                                                                                                                                                                          |
|-----------------------------------------------|-----------------------------|------------------------------------------------------------------------------------------------------------------------------------------------------------------------------------------------------------------------------------------------------------------------------------------|
| Dwyer and Mulligan (2015) [32]                | ICF                         | To analyse the data and classify the facilitators and barriers to the five components of the ICF                                                                                                                                                                                         |
| Seymour, Geiger and Scheffler (2019) [39]     | ICF                         | To analyse the data and structure the data around the components of the ICF                                                                                                                                                                                                              |
| Gonçalves Junior, Knabben and Luz (2017) [35] | ICF                         | To analyse and organise the data representing the ICF components                                                                                                                                                                                                                         |
| Arthanat, Elsaesser and Bauer (2017) [34]     | ICF                         | To design constructs for the survey                                                                                                                                                                                                                                                      |
| Gowran et al. (2021) [41]                     | SDM                         | To categorise barriers to access suitable wheelchairs to SDM components (natural, social, economic, and political)                                                                                                                                                                       |
| Steel and Layton (2016) [33]                  | ICF and IMPACT <sup>2</sup> | IMPACT <sup>2</sup> :<br>To organise and summarise sources of information around the components of a model (Context, Baseline, Intervention approaches, Outcome covariates, Outcomes)<br>ICF:<br>To expand the context of IMPACT <sup>2</sup> by considering societal and global factors |
| Widehammar et al. (2020) [37]                 | ICF                         | To create a topic guide for interviews based on the ICF components                                                                                                                                                                                                                       |
| Hammel et al. (2013) [31]                     | ICF                         | To organise the data representing the ICF components                                                                                                                                                                                                                                     |
| Serres-Lafontaine et al. (2023) [44]          | ICF                         | Data were coded deductively using the ICF                                                                                                                                                                                                                                                |

## Barriers to MATs provision synthesised using CFIR

In the intervention characteristics domain, the key barriers were cost concerns[30–34,36,38,40–42], intervention complexity[31,37,39,41], and inadequate evidence of effectiveness [33,34]

(Table 4). The outer-setting domain highlights unmet patient needs[33,35–37,39,40,42,44], geographic distance[33,35,42], and a lack of supportive legislation[31,37,39–41,43,44]. Within the inner-setting domain, resource constraints[34,35,39,41,42], restricted knowledge, and information access hinder implementation readiness[30,31,34,39,41,43]. The characteristics of the individuals' domains revealed beliefs about the intervention [39–41,43] and low self-efficacy among healthcare professionals [34,42] as barriers to its adoption. In the process domain, barriers include insufficient stakeholder engagement[31,34,43], the absence of interdisciplinary standards[34], and limited strategic planning[31]. Finally, we identified two additional barriers not covered by the CFIR domains: limited information access [30–32,35,37,42] and lack of awareness[42,43].

**Table 4 Barriers to the provision of MATs**

| CFIR Domain                         | CFIR Construct                                        | Barriers                                                                                                                                                                                                                  |
|-------------------------------------|-------------------------------------------------------|---------------------------------------------------------------------------------------------------------------------------------------------------------------------------------------------------------------------------|
| <b>Intervention characteristics</b> |                                                       |                                                                                                                                                                                                                           |
|                                     | Evidence Strength and Quality                         | <ul style="list-style-type: none"> <li>Insufficient rigorous research to demonstrate the efficacy of most MATs and associated services [33,34]</li> </ul>                                                                 |
|                                     | Complexity                                            | <ul style="list-style-type: none"> <li>The complexity of the device and its associated information [39,41]</li> <li>The length and complexity of the provisioning process [31,37,39,41]</li> </ul>                        |
|                                     | Cost                                                  | <ul style="list-style-type: none"> <li>ATs costs and expenses associated with their provision [36,38,42]</li> <li>Funding constraints [30–34,36,40,41]</li> </ul>                                                         |
|                                     | Design Quality and Packaging                          | <ul style="list-style-type: none"> <li>Inconsistent quality of devices [35,41,44]</li> </ul>                                                                                                                              |
| <b>Outer setting</b>                |                                                       |                                                                                                                                                                                                                           |
|                                     | Patient needs and resources                           | <ul style="list-style-type: none"> <li>Organisations are unaware of their patient's needs and are not involving them in service delivery [36,37,39,40,44]</li> <li>Services' geographical distances [33,35,42]</li> </ul> |
|                                     | External Policy and Incentives                        | <ul style="list-style-type: none"> <li>Inconsistencies between policies and their implementation [31,37,39,40]</li> <li>lack of legislation and policies [41,43,44]</li> </ul>                                            |
|                                     | Cosmopolitanism                                       | <ul style="list-style-type: none"> <li>Limited awareness and trustworthiness of AT vendors [31]</li> <li>Excluding MATs from insurance coverage [37]</li> </ul>                                                           |
| <b>Inner setting</b>                |                                                       |                                                                                                                                                                                                                           |
|                                     | Structural characteristics                            | <ul style="list-style-type: none"> <li>Service infrastructure issues [41]</li> </ul>                                                                                                                                      |
|                                     | Networks and communications                           | <ul style="list-style-type: none"> <li>Communication issues among professionals [31]</li> <li>Lack of coordination across different systems within the organisation [31]</li> </ul>                                       |
|                                     | Readiness for implementation<br>'Available resources' | <ul style="list-style-type: none"> <li>Shortage of staff [35,39,41,42]</li> <li>Lack of available workspace [41,42]</li> </ul>                                                                                            |

|                                        |                                                                       |                                                                                                                                                                                                                                                                                                                            |
|----------------------------------------|-----------------------------------------------------------------------|----------------------------------------------------------------------------------------------------------------------------------------------------------------------------------------------------------------------------------------------------------------------------------------------------------------------------|
|                                        |                                                                       | <ul style="list-style-type: none"> <li>▪ Lack of suitable standard instruments [34]</li> <li>▪ Lack of time to interact with the patient [39,42]</li> </ul>                                                                                                                                                                |
|                                        | Readiness for implementation'<br>Access to knowledge and information' | <ul style="list-style-type: none"> <li>▪ Lack of information and a limited understanding of AT services [31]</li> <li>▪ Healthcare Professionals (HCPs) training and education deficiencies [30,31,34,39,41,43]</li> <li>▪ HCPs were not adequately prepared for this role by their professional education [34]</li> </ul> |
| <b>Characteristics of individuals</b>  |                                                                       |                                                                                                                                                                                                                                                                                                                            |
|                                        | Knowledge, beliefs about the intervention                             | <ul style="list-style-type: none"> <li>▪ The unfamiliarity of HCPs with AT [41,43]</li> <li>▪ The lack of awareness and suggestions by treating physicians [43]</li> <li>▪ AT is viewed negatively by the public [39,40,43]</li> </ul>                                                                                     |
|                                        | Self-efficacy                                                         | <ul style="list-style-type: none"> <li>▪ Incompetent staff [34,42]</li> </ul>                                                                                                                                                                                                                                              |
| <b>Process</b>                         |                                                                       |                                                                                                                                                                                                                                                                                                                            |
|                                        | Planning                                                              | <ul style="list-style-type: none"> <li>▪ Lack of a strategic plan [31]</li> </ul>                                                                                                                                                                                                                                          |
|                                        | Engaging 'key stakeholders'                                           | <ul style="list-style-type: none"> <li>▪ lack of physician involvement and failure to refer to ATs [31,43]</li> <li>▪ Absence of interdisciplinary AT standards [34]</li> </ul>                                                                                                                                            |
|                                        | Engaging 'Internal Implementation Leaders'                            | <ul style="list-style-type: none"> <li>▪ A lack of engagement among the organisation Leaders [36,42]</li> </ul>                                                                                                                                                                                                            |
|                                        | Engaging 'External Change Agents'                                     | <ul style="list-style-type: none"> <li>▪ Limited engagement from the government, donor organisations and AT vendors [31,33,40]</li> <li>▪ Education programmes' weakness [34]</li> </ul>                                                                                                                                   |
| <b>Barriers not mapped to the CFIR</b> |                                                                       |                                                                                                                                                                                                                                                                                                                            |
|                                        | Patient access to information                                         | <ul style="list-style-type: none"> <li>▪ Lack of accessible information for the patients [30–32,35,37,42]</li> </ul>                                                                                                                                                                                                       |
|                                        | Awareness among patients                                              | <ul style="list-style-type: none"> <li>▪ The unfamiliarity of users with ATs [42,43]</li> </ul>                                                                                                                                                                                                                            |

## Theories, Models and Frameworks (TMF) Synthesis

The propositions derived from the theories, models, and frameworks are described in online supplemental appendix 3, and the resulting synthetic model is presented in Figure 2.

### Figure 2 Synthetic model.



### **Proposition 1: mobility is essential for human flourishing**

The ICF framework highlights activity as a key component of health, with disability resulting from restricted activities, such as mobility issues[45]. This affects the participation in everyday activities such as work, socialisation, and healthcare access[45]. The HAAT model explains a similar concept, describing the 'activity' as the action of performing a task that represents the functional outcome of human performance[46]. Building on these insights, 'mobility' is viewed as an individual's ability to perform tasks that enable meaningful participation. The HAAT model and IMPACT<sup>2</sup> emphasise the importance of participation in everyday activities, such as working and socialising, for overall health[46,47], describing it as "necessary to human existence"[46]. According to the HAAT model, a 'human' is defined by their intrinsic physical, cognitive, and emotional abilities[46]. Accordingly, mobility is viewed more as a necessary means of meaningful participation than an end to developing physical, cognitive, and psychosocial skills throughout life[30,38].

### **Proposition 2: health conditions and personal factors influence mobility**

The individuals' mobility is influenced by health and personal factors, which, in turn, affect their participation in social, work, and leisure activities. For example, the ICF framework clearly describes how health issues and personal factors can affect activities and participation[45], and describes health conditions as an umbrella term for disease, disorder, injury, or trauma[45]. Similarly, the HAAT model highlights the impact of a person's physical and cognitive abilities and personal elements, such as emotional and psychological factors, on their ability to perform activities[46]. Accordingly, 'personal factors' that encompass elements such as psychological attributes, age, and coping style influence an individual's ability to perform activities[45]. For instance, Dwyer and Mulligan [32] highlighted how emotional changes caused by spinal cord injury (SCI) could impede participation in rehabilitation services and other areas of reintegration such as employment and leisure activities.

### **Proposition 3: appropriate services influence mobility**

The ICF and HAAT models explicitly describe the relationships between the activities and their environments. Both emphasise the importance of activities for participating and developing in life, and some interventions can improve a person's ability to engage in the desired activities[45,46]. For instance, in the ICF framework, AT services are considered to be an environmental factor, which is appropriate for helping individuals achieve their intended activities and participate in various situations[45]. Levesque's framework identifies that 'the appropriateness of a service' is determined by its alignment with the needs of the client, whereas the HAAT model emphasises that with AT, the individual's capabilities are increased[46,48]. Consequently, to meet the individual needs and maximise capabilities, we define the appropriateness of services based on the extent to which services are tailored. This demonstrates that MATs are vital for people with disabilities and older people who require them, thus enhancing their independence and participation in daily life[30,38].

1  
2  
3 **Proposition 4: service delivery must be comprehensive to influence**  
4  
5 **human mobility**  
6  
7

8 Institutional factors significantly influence individual activities, as explained by the HAAT  
9 model [46] and ICF frameworks[45]. Levesque's framework emphasises the importance of how  
10 services are provided to meet client needs[48]. Similarly, the IMPACT<sup>2</sup> model is not only  
11 concerned with providing services but also with ensuring that outcomes are met, including QOL,  
12 participation, and satisfaction with the services provided[47]. Accordingly, the concept of  
13 'comprehensive services' refers to providing clients with all necessary support services to meet  
14 their needs and achieve satisfaction. Providing comprehensive services encompassing  
15 assessment, training, and maintenance is crucial for enhancing personal mobility[31,41].  
16 Effective delivery of AT services requires well-trained personnel[41]. These are the critical  
17 components of service delivery systems that help individuals enhance their mobility.  
18  
19  
20

21 **Proposition 5: the socio-cultural environment influences individuals'**  
22 **decision to seek appropriate health care services**  
23  
24  
25

26 AT interventions for mobility and participation are influenced by social and cultural factors that  
27 affect the individuals' health and well-being. The ICF framework views disability as a health  
28 experience arising from context, and not solely within an individual[45]. It emphasises how  
29 society can create barriers, such as inaccessible services, or neglected facilitators, such as the  
30 lack of AT[45]. Furthermore, an individual's level of functioning is determined by relationships  
31 with family, people, and healthcare providers, all of which can influence the decision to seek  
32 medical care[45]. A similar concept of how society impacts activities is highlighted by the  
33 HAAT model, which places particular emphasis on an individual's cultural context[46]. For  
34 example, parents of children with disabilities oppose wheelchairs because of social stigma[38],  
35 and some older people perceive AT negatively because of stigmatising symbolism[43]. This  
36 demonstrates the significant influence of 'sociocultural factors' such as support and relationships  
37 from family, health professionals, and community on MAT accessibility and acceptance.  
38  
39  
40

41 **Proposition 6: policies influence the provision of services**  
42  
43  
44

45 The SDM framework highlights how organisational service delivery policies influence  
46 appropriate service provision[50], whereas the ICF explains how policies affect participation and  
47 activities[45]. As part of the ICF, the term 'policy' is commonly used within the environmental  
48 factor domain as an external factor that can impact an individual's health and function[45]. This  
49 is a set of guidelines, rules, and regulations that govern the range of services provided to  
50 individuals, such as policies and standards that define the eligibility criteria for services[45]. For  
51 instance, prostheses are not considered to be life-saving medical devices or crucial components  
52 of the healthcare system[35]. However, they are life-changing for users and quickly restore most  
53 functions over time[35]. Levesque's framework argues that the availability of health services  
54 implies that those in need can access either physical space or healthcare personnel[48].  
55  
56  
57  
58  
59  
60



1  
2  
3 Therefore, individuals cannot access healthcare if they are unavailable in their geographic area or  
4 if insurance does not cover their treatment[48]. This can prevent individuals from receiving the  
5 healthcare they require, which can adversely affect their health. Disparities between government  
6 and institutional policies can result in confusion among AT providers and decrease service  
7 utilisation[39,41].  
8  
9

### 10 **Proposition 7: Cost influences the provision of appropriate services**

11  
12  
13 The SDM framework [50] highlights the significant influence of economic factors on service  
14 delivery, reinforcing the idea that costs can significantly influence access to healthcare services.  
15 The term 'cost' refers to the expenses that individuals and healthcare systems incur to provide  
16 healthcare services[47,48]. This comprises the direct prices of services, such as consultation fees,  
17 device costs, and related expenses[48]. For instance, the IMPACT<sup>2</sup> model underlines the role of  
18 cost implications in selecting intervention approaches and demonstrating the cost effects at each  
19 stage of AT provision[47]. The ability of an individual to generate economic resources, such as  
20 income, to cover these costs is also critical, according to Lavesque et al. [48] framework.  
21 Therefore, costs can play a considerable role in determining AT use and access.  
22  
23  
24

### 25 **Proposition 8: Personal factors influence healthcare utilisation**

26  
27  
28 Healthcare utilisation is influenced by various 'personal factors' representing an individual's  
29 internal aspects, such as psychological characteristics[45]. This concept is explained using  
30 Levesque's framework. It highlights factors such as an individual's need for care, awareness of  
31 these needs, and desire for treatment[48]. Gibson's affordance theory suggests that an  
32 individual's perception of their environment is based on its potential to fulfil their needs, thereby  
33 shaping their decisions[49]. Therefore, the individual is responsible for unravelling the utility  
34 presented by affordance. For instance, Mairami et al. [36] adapted a chair from a home to a  
35 wheelchair. This demonstrates how the client's perception of their environment shaped recovery  
36 when an existing structure was found to have assistive potential. The ICF model explains the  
37 significance of environmental factors such as the visibility of services in determining an  
38 individual's level of functioning[45], which is related to Gibson's affordance theory, in which  
39 environmental cues trigger actions[49]. Consequently, a lack of service limits the activities that  
40 can be conducted.  
41  
42  
43  
44

### 45 **Proposition 9: Limited access to healthcare services creates disability**

46  
47  
48 The ICF acknowledges the influence of environmental factors on disability development and  
49 emphasises the limitations it imposes on individuals' abilities to access healthcare services and  
50 engage in social activities[45]. As defined by the ICF, disabilities include impairments,  
51 limitations in activity levels, and restrictions on participation[45]. Consequently, restricted AT  
52 accessibility impairs body function, hinders participation, and contributes to disabilities. The  
53 SDM framework explains the significance of economic factors, particularly the "lack of  
54 economic means", which limit access to services such as MAT[50]. Restricted access can trigger  
55 continuous cycles of disabilities and poverty[41]. Persistent mobility constraints, whether due to  
56  
57  
58  
59  
60

1  
2  
3 inadequate MAT service support or diminished participation in daily life, have been identified as  
4 significant factors that lead to disability[39,40].  
5  
6

## 7 **Gaps analysis**

8  
9

10 This review highlights the key research areas in AT services that warrant further investigation  
11 [online supplemental appendix 4]. Investigations should focus on AT access in remote  
12 regions;[30,38,42] stakeholder perspectives concerning rehabilitation services and AT access  
13 barriers;[39,42,44] and funding, policy, and legislation challenges[32,34,36,40,41,44]. Data  
14 collection and methodological enhancements are required, including standardised instruments for  
15 assessing functioning and disability[35,37], comparisons of user experiences with and without  
16 AT[31,33], and comprehensive evaluation tools that combine objective and subjective  
17 measures[31,33]. Emphasis should also be placed on understanding the in-country perspectives,  
18 inclusive solutions, and the impact of contextual factors on access to AT and service  
19 evaluation[41]. Addressing these research gaps can contribute to the development of more  
20 effective, inclusive, and accessible AT services for individuals with disabilities.  
21  
22  
23

## 24 **Discussion**

25  
26  
27

28 This scoping review offers a summary of the barriers to MAT provision and synthesises theories  
29 to guide future work based on 15 articles. The synthesised theory emphasises that mobility is  
30 essential for human flourishing (Proposition 1) and that certain health conditions may impose  
31 restrictions on mobility (Proposition 2). This impact can be ameliorated by two direct  
32 determinants: the provision of suitable services (Proposition 3), and their comprehensive  
33 provision (Proposition 4). These services are indirectly influenced by policies (Proposition 6)  
34 and costs (Proposition 7). Furthermore, an individual's decision to access these services is also  
35 determined by their sociocultural environment (Proposition 5) and personal factors (Proposition  
36 8). If these direct and indirect determinants are not effectively addressed, it could result in  
37 limited access to MATs and subsequent disability (Proposition 9). This synthesised theory  
38 integrates empirical and ethical dimensions and provides evidence-based approaches for solving  
39 problems[51].  
40  
41

42 To the best of our knowledge, this is the first report on the synthesis of TMFs and barriers  
43 to MAT provision. Although De Alves and Matsukura's [52] literature review outlines the  
44 various theoretical models used in the AT literature, they did not attempt theoretical synthesis.  
45 TMFs organise concepts and thoughts that can provide insights into different elements of  
46 practice and research[53]. Lakatos proposes that scientific enquiry should appraise a series of  
47 theories, rather than a single theory, noting that "the members of such series of theories are  
48 usually connected by a remarkable continuity which welds them into research programmes"[54].  
49 Lakatos advocated for a 'pluralistic model' of scientific theories, in which a number of theories,  
50 which are organised deductively to varying degrees, are brought together in a unified  
51 approach[54]. Unlike Lakatos, we view this work as enhancing problem-solving  
52 effectiveness[55]. By combining propositions from different theories, we increase the coverage  
53 of the resulting syntheses of individual theories. It follows that it should predict the range of  
54 barriers encountered in AT access and provision.  
55  
56  
57

1  
2  
3 The theory covers a socially significant issue given that it addresses the current research  
4 priorities identified by expert panels organised by government agencies and clinical specialty  
5 organisations[10,56,57]. It addresses the phenomenon of interest to rehabilitation scholars by  
6 filling the gaps in existing TMFs. Specification adequacy is achieved by providing a clear and  
7 concise overview of the theoretical synthesis. Additionally, we establish linkage adequacy by  
8 defining concepts and their relationships[58]. The theory is testable because it contains  
9 observable concepts and propositions that can be operationalised and corroborated in empirical  
10 research. A limitation of the scoping review was the exclusion of non-English language studies,  
11 which could limit the applicability of the findings[59], and patient and public engagement could  
12 have added additional perspectives and insights to the study.  
13

14  
15 The insights from this review and the resulting integrated model have the potential to  
16 influence clinical practice and policymaking in line with the ethical imperatives outlined by the  
17 WHO and UN[9,13]. These organisations have emphasised the necessity of AT to meet  
18 individual needs and enable equitable opportunities for people with disabilities. Therefore, this  
19 review proposes a theoretical basis for reforming the existing system to align with these  
20 international standards, thus addressing pressing and unmet needs more equitably and personally.  
21 To achieve this, future research must examine these determinants, understand the barriers to  
22 MAT provision, and plan and evaluate strategies to enhance provision. Having a set of  
23 determinants organised around the CFIR [24] allows the creation of local implementation  
24 strategies to suit different policy jurisdictions.  
25

26 There is a consensus [60,61] and evidence-based route [62] to overcoming the barriers to  
27 effective AT provision found in this review. The barriers identified by the CFIR can be linked to  
28 the Expert Recommendations for Implementing Change (ERIC) strategies[63]. These strategies  
29 guide the selection of implementation methods to mitigate barriers and include: (1) activating  
30 local clinical leaders or champions, (2) providing educational materials, (3) organising meetings,  
31 and (4) implementing outreach or ongoing training. Notably, these strategies demonstrate  
32 average effect sizes of 12%, 2%, 6%, and 6%, respectively[62]. The implementation of these  
33 strategies can assist decision-makers in making informed choices regarding the selection of  
34 strategies for MAT provision.  
35  
36  
37

## 38 Conclusion

39  
40  
41 The synthesised theory emphasises that mobility is a crucial aspect in human life, and that certain  
42 health conditions may restrict mobility. Providing comprehensive and appropriate services can  
43 reduce this impact; however, cost and policy decisions regarding these services impact their  
44 provision. The accessibility of these services is also affected by sociocultural and personal  
45 factors. This knowledge can be used to develop strategies to enhance provision.  
46  
47  
48

## 49 Acknowledgments

50  
51  
52 The authors thank Louise Falzon of the School of Medicine and Population Health, University of  
53 Sheffield. She provided invaluable assistance in refining our search strategy. We would also like  
54 to thank the University of Sheffield Institutional Open Access Fund for its funding towards the  
55 research. This work was previously presented at the 17th International Conference of the  
56  
57  
58

1  
2  
3 Association for the Advancement of Assistive Technology in Europe (AAATE 2023) held in  
4 Paris between 30 August and 1 September, 2023[64].  
5

## 6 7 **Contributors** 8 9

10 All authors contributed to the conceptualisation and design of the study. Initial title and abstract  
11 screening was conducted by AA, with regular consultations with DH, SR, and BF. AA  
12 performed data extraction independently with regular discussions with DH, SR, and BF. The  
13 initial data synthesis was conducted by AA and refined by DH, SR, and BF. The manuscript was  
14 drafted by AA, and major revisions were made by DH, SR, and BF. All authors (AA, DH, SR,  
15 and BF) read and approved the final manuscript.  
16  
17

## 18 19 **Funding** 20

21 This research received no specific grants from any funding agency in the public,  
22 commercial, or not-for-profit sectors.  
23  
24

## 25 26 **Competing interests** 27

28 The authors report there are no competing interests to declare.  
29  
30

## 31 32 **Data availability statement** 33 34

35 The authors confirm that the data supporting the findings of this study are available in the  
36 article and supplementary material.  
37  
38

## 39 40 **Rights Retention Statement** 41 42

43 For the purpose of open access, the author has applied a Creative Commons Attribution (CC BY)  
44 licence to any Author Accepted Manuscript version arising.  
45  
46

## 47 48 **Supporting materials** 49

50 Appendix 1, Table. Systematic search conducted in MEDLINE, EMBASE and CINAHL  
51 Appendix 2, Table. Characteristics of included papers  
52 Appendix 3, Table. Propositions derived from the theories, models, and frameworks  
53 Appendix 4, Table. Gaps analysis  
54  
55  
56  
57  
58  
59  
60

Appendix 5, Checklist. Preferred Reporting Items for Systematic reviews and Meta-Analyses extension for Scoping Reviews (PRISMA-ScR)

## ORCID iDs

Asma Aldawood, <https://orcid.org/0000-0003-4670-4348>

Daniel Hind, <https://orcid.org/0000-0002-6409-4793>

Simon Rushton, <https://orcid.org/0000-0003-1055-9871>

Becky Field, <https://orcid.org/0000-0003-3502-2691>

## References

- 1 Shafrin J, Sullivan J, Goldman DP, *et al.* The association between observed mobility and quality of life in the near elderly. *PLoS One* 2017;**12**:e0182920. PMID: 28827806
- 2 Bechtold U, Stauder N, Fieder M. Let's Walk It: Mobility and the Perceived Quality of Life in Older Adults. *Int J Environ Res Public Health* 2021;**18**:11515. PMID: 34770028
- 3 World Health Organization and World Bank. World report on disability. Geneva: *World Health Organization*; 2011. Available from: <https://www.who.int/publications/i/item/9789241564182>.
- 4 van Hees SGM, van den Borne BHP, Menting J, *et al.* Patterns of social participation among older adults with disabilities and the relationship with well-being: A latent class analysis. *Arch Gerontol Geriatr* 2020;**86**:103933. PMID: 31542633
- 5 Achilike S, Beauchamp JES, Cron SG, *et al.* Caregiver Burden and Associated Factors among Informal Caregivers of Stroke Survivors. *Journal of Neuroscience Nursing* 2020;**52**:277–83. PMID: 33156591
- 6 Ferretti EC, Curi HT, Andrade LF, *et al.* Conceptual mapping proposed to comprehend the effect of wheelchair mobility on social participation and quality of life: a systematic review. *Disabil Rehabil Assist Technol* 2022;**19**:1-17. PMID: 36260418
- 7 Pettersson I, Hagberg L, Fredriksson C, *et al.* The effect of powered scooters on activity, participation and quality of life in elderly users. *Disabil Rehabil Assist Technol* 2016;**11**:558–63. PMID: 25799878
- 8 Frank A, Neophytou C, Frank J, *et al.* Electric-powered indoor/outdoor wheelchairs (EPIOCs): users' views of influence on family, friends and carers. *Disabil Rehabil Assist Technol* 2010;**5**:327–338. PMID: 20377422
- 9 World Health Organization. Global priority research agenda for improving access to high-quality affordable assistive technology. Geneva: *World Health Organization*; 2017. Available from: <https://apps.who.int/iris/handle/10665/254660>
- 10 Alqahtani S, Joseph J, Dicianno B, *et al.* Stakeholder perspectives on research and development priorities for mobility assistive-technology: a literature review. *Disabil Rehabil Assist Technol* 2021;**16**:362–76. PMID: 31535934



- 1  
2  
3 11 Hagberg L, Hermansson L, Fredriksson C, *et al.* Cost-effectiveness of powered mobility devices  
4 for elderly people with disability. *Disabil Rehabil Assist Technol* 2017;**12**:115–120. PMID:  
5 25634493  
6  
7 12 Frossard L, Ferrada L, Quincey T, *et al.* Cost-effectiveness of transtibial bone-anchored  
8 prostheses using osseointegrated fixation: From challenges to preliminary data. *Journal of*  
9 *Prosthetics and Orthotics* 2021;**33**:184–195. doi:10.1097/JPO.0000000000000372  
10  
11 13 United Nations. United Nations Convention on the Rights of Persons with Disabilities. United  
12 Nations; 2007.  
13 14 World Health Organization. Priority assistive products list: improving access to assistive  
14 technology for everyone, everywhere. Geneva: WHO; 2016. Available from:  
15 <https://apps.who.int/iris/handle/10665/207694>.  
16  
17 15 Danemayer J, Boggs D, Delgado Ramos V, *et al.* Estimating need and coverage for five priority  
18 assistive products: a systematic review of global population-based research. *BMJ Glob Health*  
19 2022;**7**:e007662. PMID: 35101862  
20  
21 16 Wang RH, Zdaniuk N, Durocher E, *et al.* Policymaker and stakeholder perspectives on access to  
22 assistive technologies in Canada: challenges and proposed solutions for enhancing equitable  
23 access. <https://doi.org/10.1080/1748310720201765033> 2020;**17**:61–73. PMID: 32489125  
24  
25 17 World Health Organization. Policy brief - Access to assistive technology. Geneva: WHO; 2020.  
26 Available from: <https://www.who.int/publications/i/item/978-92-4-000504-4>  
27  
28 18 Ekman B, Mishra S, Pupulin A, *et al.* Sustainable and equitable provision of wheelchairs in low-  
29 and middle-income countries: an economic assessment of the models for wheelchair provision  
30 in Tajikistan; *Disabil Rehabil Assist Technol* 2020;**16**:865–870. PMID: 32228245  
31  
32 19 Denzin NK. *The Research Act: A Theoretical Introduction to Sociological Methods*. 1st ed. USA  
33 (New York): Transaction publishers; 2009. Chapter 12, Strategies of multiple triangulation; p.  
34 234-247  
35  
36 20 Khalil H, Tricco AC. Differentiating between mapping reviews and scoping reviews in the  
37 evidence synthesis ecosystem. *J Clin Epidemiol* 2022;**149**:175–182. PMID: 35636593  
38  
39 21 Arksey H, O'Malley L. Scoping studies: towards a methodological framework. *Int J Soc Res*  
40 *Methodol* 2005;**8**:19–32. doi:10.1080/1364557032000119616  
41  
42 22 Tricco AC, Lillie E, Zarin W, *et al.* PRISMA Extension for Scoping Reviews (PRISMA-ScR): Checklist  
43 and Explanation. *Ann Intern Med* 2018;**169**:467–473 PMID: 30178033  
44  
45 23 Booth A, Carroll C. Systematic searching for theory to inform systematic reviews: is it feasible?  
46 Is it desirable? *Health Info Libr J* 2015;**32**:220–235. PMID: 26095232  
47  
48 24 Damschroder LJ, Aron DC, Keith RE, *et al.* Fostering implementation of health services research  
49 findings into practice: a consolidated framework for advancing implementation science.  
50 *Implement Sci* 2009;**4**:50. PMID: 19664226  
51  
52 25 Keith RE, Crosson JC, O'Malley AS, *et al.* Using the Consolidated Framework for Implementation  
53 Research (CFIR) to produce actionable findings: a rapid-cycle evaluation approach to improving  
54 implementation. *Implement Sci* 2017;**12**:15. PMID: 28187747  
55  
56 26 Popay J, Roberts H, Sowden A, Petticrew M, Arai L, Rodgers M, *et al.* Guidance on the conduct  
57 of narrative synthesis in systematic reviews. Prod ESRC Methods Programme Version. 2006;**1**:  
58 b92. doi:10.13140/2.1.1018.4643  
59  
60

- 1  
2  
3 27 Pound P, Campbell R. Exploring the feasibility of theory synthesis: A worked example in the field  
4 of health related risk-taking. *Soc Sci Med* 2015;**124**:57–65. doi:10.1016/j.socscimed. PMID:  
5 25461862  
6  
7 28 Turner JH. Developing Cumulative and Practical Knowledge through Metatheorizing.  
8 *Sociological Perspectives* 1991;**34**:249–268. doi:10.2307/1389510  
9  
10 29 Page MJ, McKenzie JE, Bossuyt PM, *et al*. The PRISMA 2020 statement: an updated guideline for  
11 reporting systematic reviews. *BMJ* 2021;**372**:n71 PMID: 33782057  
12  
13 30 Layton N. Barriers and Facilitators to Community Mobility for Assistive Technology Users.  
14 *Rehabil Res Pract* 2012;**2012**:1–9. PMID: 23029617  
15  
16 31 Hammel J, Southall K, Jutai J, *et al*. Evaluating use and outcomes of mobility technology: a  
17 multiple stakeholder analysis. *Disabil Rehabil Assist Technol* 2013;**8**:294–304. PMID: 23137189  
18  
19 32 Dwyer K, Mulligan H. Community reintegration following spinal cord injury: Insights for health  
20 professionals in community rehabilitation services in New Zealand. *New Zealand Journal of*  
21 *Physiotherapy* 2015;**43**:75–85. doi:10.15619/NZJP/43.3.02  
22  
23 33 Steel EJ, Layton NA. Assistive Technology in Australia: Integrating theory and evidence into  
24 action. *Aust Occup Ther J* 2016;**63**:381–390. PMID: 27086661  
25  
26 34 Arthanat S, Elsaesser L-JJ, Bauer S. A survey of assistive technology service providers in the USA.  
27 *Disabil Rehabil Assist Technol* 2017;**12**:789–800. PMID: 28125297  
28  
29 35 Gonçalves E, Knabben J, Luz C. Portraying the amputation of lower limbs: an approach using ICF.  
30 *Fisioterapia em Movimento* 2017;**30**:97–106. doi:10.1590/1980-5918.030.001.ao10  
31  
32 36 Mairami FF, Allotey P, Warren N, *et al*. Adaptive invention: independence and mobility through  
33 modifications. *Disabil Rehabil Assist Technol* 2018; **13**:658–664. PMID: 28836873  
34  
35 37 Widehammar C, Lidström Holmqvist K, Pettersson I, *et al*. Attitudes is the most important  
36 environmental factor for use of powered mobility devices—users’ perspectives. *Scand J Occup*  
37 *Ther* 2020;**27**:298–308. PMID: 30856033  
38  
39 38 Jindal P, MacDermid J, Rosenbaum P, *et al*. Perspectives on rehabilitation of children with  
40 cerebral palsy: exploring a cross-cultural view of parents from India and Canada using the  
41 international classification of functioning, disability and health. *Disabil Rehabil* 2018;**40**:2745–  
42 55. PMID: 28747138  
43  
44 39 Seymour N, Geiger M, Scheffler E. Community-based rehabilitation workers’ perspectives of  
45 wheelchair provision in Uganda: A qualitative study. *Afr J Disabil* 2019;**8**: 2226-7220. PMID:  
46 31061818  
47  
48 40 Dorjbal D, Prodinge B, Zanini C, *et al*. Living with spinal cord injury in Mongolia: A qualitative  
49 study on perceived environmental barriers. *J Spinal Cord Med* 2020;**43**:518–31. PMID:  
50 30633693  
51  
52 41 Gowran RJ, Bray N, Goldberg M, *et al*. Understanding the global challenges to accessing  
53 appropriate wheelchairs: Position paper. *Int J Environ Res Public Health* 2021;**18**:3338. PMID:  
54 33804868  
55  
56 42 McIntyre J, Cleland K, Ramklass S. Access to wheelchairs by persons with mobility impairment in  
57 a remote rural district of KwaZulu-Natal, South Africa: therapists’ perspectives. *Rural Remote*  
58 *Health* 2021;**21**:5855. PMID: 33478230  
59  
60 43 Bhidayasiri R, Maytharakcheep S, Phumphid S, *et al*. Improving functional disability in patients  
with tremor: A clinical perspective of the efficacies, considerations, and challenges of assistive  
technology. *J Neurol Sci* 2022;**435**:120197.PMID: 35220112

- 1  
2  
3 44 Serres-Lafontaine A de, Labbé D, Batcho CS, *et al.* Social participation of individuals with spinal  
4 injury using wheelchairs in rural Tanzania after peer training and entrepreneurial skills training.  
5 *Afr J Disabil* 2023;**12**. PMID: 36756462
- 6  
7 45 World Health Organization. International classification of functioning, disability and health: ICF.  
8 Geneva: WHO; 2001.
- 9  
10 46 Cook A, Polgar J. Activity, human, and context: the human doing an activity in context. In: Cook  
11 A, Polgar J, editors. *Assistive technologies: principles and practice*. 4th ed. St. Louis (MO):  
12 Mosby; 2015. p. 40–67
- 13  
14 47 Smith RO. IMPACT2 Model. Rehabilitation Research Design and Disability Center. 2005.  
15 Available from: <https://uwm.edu/r2d2/methods/impact2-model/>.
- 16  
17 48 Levesque J-F, Harris MF, Russell G. Patient-centred access to health care: conceptualising access  
18 at the interface of health systems and populations. *Int J Equity Health* 2013;**12**:18. PMID:  
19 23496984
- 20  
21 49 Gibson JJ. *The ecological approach to visual perception: classic edition*. New York and London:  
22 Psychology Press; 2014.
- 23  
24 50 World Engagement Institute. Sustainable Capacity—Systemic Development Model. 2012  
25 Available from: <http://www.weinstitute.org/methods.html>
- 26  
27 51 Fawcett J. An overview of conceptual models, theories, and research. In: Fawcett J, editor. *The*  
28 *relationship of theory and research*. 3rd ed. Philadelphia (PA): F.A. Davis Company; 1999. p. 1–  
29 25.
- 30  
31 52 de Jesus Alves AC, Matsukura TS. Theoretic models for recommendation and implementation of  
32 assistive technology 1. *Cadernos de Terapia Ocupacional da UFSCar* 2016;**24**:591.  
33 doi:10.4322/0104-4931.ctoAO1078
- 34  
35 53 Nilsen P. Making sense of implementation theories, models and frameworks. *Implement Sci*  
36 2015;**10**:53. PMID: 25895742
- 37  
38 54 Lakatos I. Falsification and the Methodology of Scientific Research Programmes. In: *Lakatos I,*  
39 *Musgrave A, editors. Criticism and the Growth of Knowledge*. Cambridge: Cambridge University  
40 Press; 1970. p. 91–196.
- 41  
42 55 Long DM. Pragmatism, realism, and psychology: Understanding theory selection criteria. *J*  
43 *Contextual Behav Sci* 2013;**2**:61–7. doi:10.1016/J.JCBS.2013.09.003
- 44  
45 56 Satpute S, Cooper R, Dicianno BE, *et al.* Mini-review: Rehabilitation engineering: Research  
46 priorities and trends. *Neurosci Lett* 2021;**764**:136207. PMID: 34478814
- 47  
48 57 Best K, Smith E, Pellichero A, Sorita E, Archambault P, Kenyon L, *et al.* International research  
49 priorities on the role of cognition in power mobility device use: In pursuit of informed clinical  
50 practices and knowledge translation. *Assistive Technology*. 2021; 35(2): 119-126. PMID:  
51 34293271
- 52  
53 58 Fawcett J. Evaluating Conceptual-Theoretical-Empirical Structures for Research. In: Fawcett J.  
54 *The relationship of theory and research*. 3rd ed. Philadelphia: F.A. Davis Company; 1999. p.85-  
55 117.
- 56  
57 59 Stern C, Kleijnen J. Language bias in systematic reviews: You only get out what you put in. *JB*  
58 *Evid Synth* 2020;**18**:1818–9. doi:10.11124/JBIES-20-00361
- 59  
60 60 Powell BJ, McMillen JC, Proctor EK, *et al.* A Compilation of Strategies for Implementing Clinical  
Innovations in Health and Mental Health. *Medical Care Research and Review* 2012;**69**:123–57.  
PMID: 22203646



- 1  
2  
3 61 Powell BJ, Waltz TJ, Chinman MJ, *et al.* A refined compilation of implementation strategies:  
4 Results from the Expert Recommendations for Implementing Change (ERIC) project.  
5 *Implementation Science* 2015;**10**:1–14. PMID: 25889199  
6  
7 62 Powell BJ, Fernandez ME, Williams NJ, *et al.* Enhancing the Impact of Implementation Strategies  
8 in Healthcare: A Research Agenda. *Front Public Health* 2019;**7**. PMID: 30723713  
9  
10 63 Waltz TJ, Powell BJ, Fernández ME, *et al.* Choosing implementation strategies to address  
11 contextual barriers: Diversity in recommendations and future directions. *Implementation*  
12 *Science* 2019;**14**:1–15. PMID: 31036028  
13  
14 64 Aldawood A, Hind D, Rushton S, Field B. Theories, models and frameworks to understand  
15 barriers to the provision of mobility assistive technologies: A scoping review. In:  
16 Kouroupetroglou G, Archambault D, editors. 17th International Conference of the Association  
17 for the Advancement of Assistive Technology in Europe, AAATE 2023; 2023 Aug 30-Sep 1; Paris,  
18 France.  
19  
20  
21  
22  
23  
24  
25  
26  
27  
28  
29  
30  
31  
32  
33  
34  
35  
36  
37  
38  
39  
40  
41  
42  
43  
44  
45  
46  
47  
48  
49  
50  
51  
52  
53  
54  
55  
56  
57  
58  
59  
60

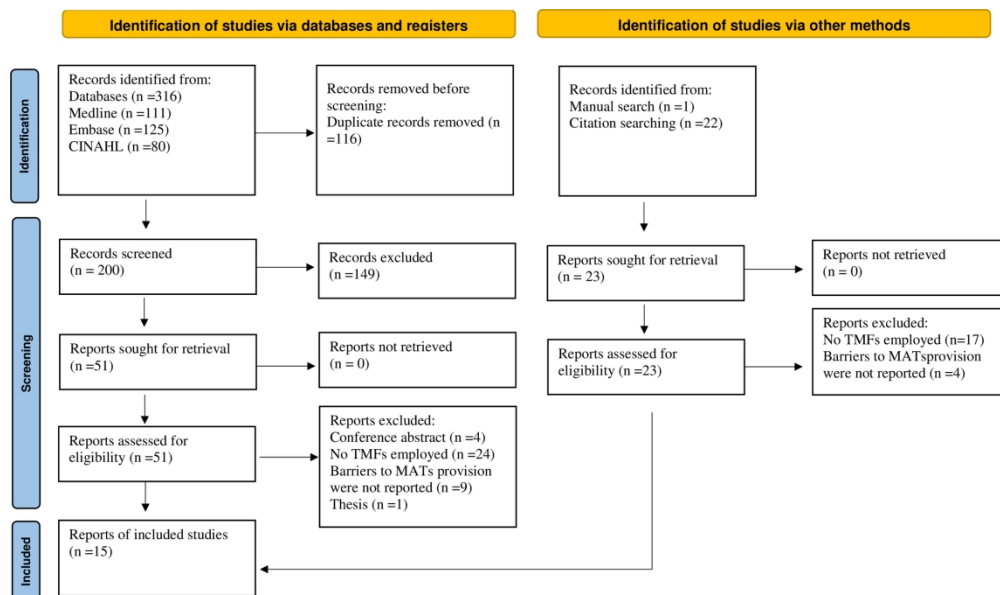

Figure 1 PRISMA flow diagram

190x112mm (300 x 300 DPI)

1  
2  
3  
4  
5  
6  
7  
8  
9  
10  
11  
12  
13  
14  
15  
16  
17  
18  
19  
20  
21  
22  
23  
24  
25  
26  
27  
28  
29  
30  
31  
32  
33  
34  
35  
36  
37  
38  
39  
40  
41  
42  
43  
44  
45  
46  
47  
48  
49  
50  
51  
52  
53  
54  
55  
56  
57  
58  
59  
60

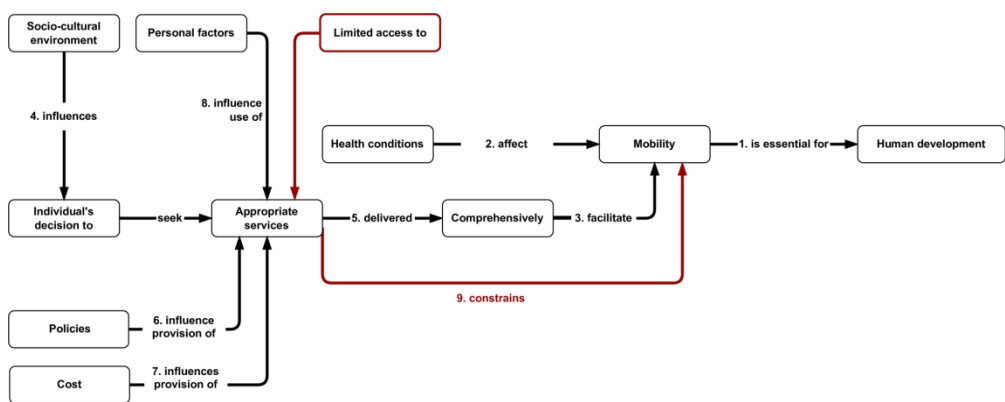

Figure 2 Synthetic model  
190x74mm (300 x 300 DPI)

## Appendix 1. Systematic search conducted in MEDLINE, EMBASE and CINAHL

Database(s): **Ovid MEDLINE(R)** Search Strategy:

| #  | Query                                                                                                              | Results from 15 June 2023 |
|----|--------------------------------------------------------------------------------------------------------------------|---------------------------|
| 1  | (Access* adj10 (barrier* or challeng* or restrict* or obstacle* or impediment* or difficult* or issue*)).ab,ti.    | 60,142                    |
| 2  | (Provision* adj10 (barrier* or challeng* or restrict* or obstacle* or impediment* or difficult* or issue*)).ab,ti. | 7,533                     |
| 3  | (Provide* adj10 (barrier* or challeng* or restrict* or obstacle* or impediment* or difficult* or issue*)).ab,ti.   | 98,418                    |
| 4  | (Adoption* adj10 (barrier* or challeng* or restrict* or obstacle* or impediment* or difficult* or issue*)).ab,ti.  | 6,925                     |
| 5  | Wheelchairs/                                                                                                       | 5,387                     |
| 6  | Orthotic Devices/                                                                                                  | 6,900                     |
| 7  | Exoskeleton Device/                                                                                                | 1,423                     |
| 8  | Mobility device*.ab,ti.                                                                                            | 509                       |
| 9  | Mobility technolog*.ab,ti.                                                                                         | 48                        |
| 10 | Wheelchair*.ab,ti.                                                                                                 | 8,603                     |
| 11 | Scooter*.ab,ti.                                                                                                    | 763                       |
| 12 | Walker*.ab,ti.                                                                                                     | 14,979                    |
| 13 | Prosthetic*.ab,ti.                                                                                                 | 62,479                    |
| 14 | prosthesis/                                                                                                        | 49,611                    |
| 15 | orthotic*.ab,ti.                                                                                                   | 3,593                     |
| 16 | Self-Help Devices/                                                                                                 | 5,679                     |
| 17 | Exoskeleton*.ab,ti.                                                                                                | 4,327                     |
| 18 | Orthos*.ab,ti.                                                                                                     | 25,430                    |
| 19 | power mobility.ab,ti.                                                                                              | 126                       |
| 20 | Prosthe* device*.ab,ti.                                                                                            | 2,343                     |
| 21 | (Assistive technolog* adj10 mobility).ab,ti.                                                                       | 129                       |
| 22 | (Assistive device* adj10 mobility).ab,ti.                                                                          | 199                       |
| 23 | Disabled Persons/                                                                                                  | 47,551                    |
| 24 | Mobility Limitation/                                                                                               | 5,263                     |
| 25 | Elder*.ti,ab.                                                                                                      | 300,845                   |
| 26 | Physical* Disable*.ab,ti.                                                                                          | 927                       |
| 27 | Disable*.ab,ti.                                                                                                    | 28,928                    |
| 28 | Disabilit*.ab,ti.                                                                                                  | 237,278                   |
| 29 | Walking difficult*.ab,ti.                                                                                          | 641                       |

|    |                                                                                                          |           |
|----|----------------------------------------------------------------------------------------------------------|-----------|
| 30 | Handicap*.ab,ti.                                                                                         | 25,545    |
| 31 | physical* impair*.ab,ti.                                                                                 | 3,077     |
| 32 | physical* Challeng*.ab,ti.                                                                               | 657       |
| 33 | Ambulat* Difficult*.ab,ti.                                                                               | 83        |
| 34 | Mobility difficult*.ab,ti.                                                                               | 233       |
| 35 | Mobility impair*.ab,ti.                                                                                  | 1,314     |
| 36 | Mobility limit*.ab,ti.                                                                                   | 1,405     |
| 37 | Amput*.ab,ti.                                                                                            | 52,056    |
| 38 | Motor difficult*.ab,ti.                                                                                  | 510       |
| 39 | Amputation/                                                                                              | 23,717    |
| 40 | Geriatrics/                                                                                              | 31,360    |
| 41 | (theor* or framework* or model* or taxonom* or classifi* or concept*).ab,ti.                             | 5,542,093 |
| 42 | 5 or 6 or 7 or 8 or 9 or 10 or 11 or 12 or 13 or 15 or 16 or 17 or 18 or 19 or 20 or 21 or 22            | 127,001   |
| 43 | 23 or 24 or 25 or 26 or 27 or 28 or 29 or 30 or 31 or 32 or 33 or 34 or 35 or 36 or 37 or 38 or 39 or 40 | 671,443   |
| 44 | 1 or 2 or 3 or 4                                                                                         | 165,668   |
| 45 | 42 and 43 and 44                                                                                         | 416       |
| 46 | 41 and 45                                                                                                | 119       |
| 47 | limit 46 to english language                                                                             | 113       |
| 48 | limit 47 to yr="2000 -Current"                                                                           | 111       |

Database(s): **Ovid Embase** Search Strategy:

| #  | Query                                                                                                              | Results from 15 June 2023 |
|----|--------------------------------------------------------------------------------------------------------------------|---------------------------|
| 1  | (Access* adj10 (barrier* or challeng* or restrict* or obstacle* or impediment* or difficult* or issue*)).ab,ti.    | 83,427                    |
| 2  | (Provision* adj10 (barrier* or challeng* or restrict* or obstacle* or impediment* or difficult* or issue*)).ab,ti. | 10,063                    |
| 3  | (Provide* adj10 (barrier* or challeng* or restrict* or obstacle* or impediment* or difficult* or issue*)).ab,ti.   | 126,340                   |
| 4  | (Adoption* adj10 (barrier* or challeng* or restrict* or obstacle* or impediment* or difficult* or issue*)).ab,ti.  | 8,412                     |
| 5  | Wheelchairs/                                                                                                       | 10,870                    |
| 6  | Orthotic Devices/                                                                                                  | 7,175                     |
| 7  | Exoskeleton Device/                                                                                                | 1,300                     |
| 8  | Mobility device*.ab,ti.                                                                                            | 619                       |
| 9  | Mobility technolog*.ab,ti.                                                                                         | 58                        |
| 10 | Wheelchair*.ab,ti.                                                                                                 | 13,074                    |
| 11 | Scooter*.ab,ti.                                                                                                    | 946                       |
| 12 | Walker*.ab,ti.                                                                                                     | 17,493                    |
| 13 | Prosthetic*.ab,ti.                                                                                                 | 75,413                    |
| 14 | prosthesis/                                                                                                        | 34,102                    |
| 15 | orthotic*.ab,ti.                                                                                                   | 5,157                     |
| 16 | Self-Help Devices/                                                                                                 | 2,780                     |
| 17 | Exoskeleton*.ab,ti.                                                                                                | 4,975                     |
| 18 | Orthos*.ab,ti.                                                                                                     | 35,586                    |
| 19 | power mobility.ab,ti.                                                                                              | 158                       |
| 20 | Prosthe* device*.ab,ti.                                                                                            | 2,755                     |
| 21 | (Assistive technolog* adj10 mobility).ab,ti.                                                                       | 161                       |
| 22 | (Assistive device* adj10 mobility).ab,ti.                                                                          | 289                       |
| 23 | Disabled Persons/                                                                                                  | 30,776                    |
| 24 | Mobility Limitation/                                                                                               | 14,073                    |
| 25 | Elder*.ti,ab.                                                                                                      | 430,022                   |
| 26 | Physical* Disable*.ab,ti.                                                                                          | 1,195                     |
| 27 | Disable*.ab,ti.                                                                                                    | 37,699                    |
| 28 | Disabilit*.ab,ti.                                                                                                  | 341,446                   |
| 29 | Walking difficult*.ab,ti.                                                                                          | 1,206                     |
| 30 | Handicap*.ab,ti.                                                                                                   | 31,319                    |

|    |                                                                                                          |           |
|----|----------------------------------------------------------------------------------------------------------|-----------|
| 31 | physical* impair*.ab,ti.                                                                                 | 4,424     |
| 32 | physical* Challeng*.ab,ti.                                                                               | 932       |
| 33 | Ambulat* Difficult*.ab,ti.                                                                               | 124       |
| 34 | Mobility difficult*.ab,ti.                                                                               | 328       |
| 35 | Mobility impair*.ab,ti.                                                                                  | 1,786     |
| 36 | Mobility limit*.ab,ti.                                                                                   | 1,880     |
| 37 | Amput*.ab,ti.                                                                                            | 66,146    |
| 38 | Motor difficult*.ab,ti.                                                                                  | 721       |
| 39 | Amputation/                                                                                              | 26,124    |
| 40 | Geriatrics/                                                                                              | 33,963    |
| 41 | (theor* or framework* or model* or taxonom* or classifi* or concept*).ab,ti.                             | 6,952,806 |
| 42 | 5 or 6 or 7 or 8 or 9 or 10 or 11 or 12 or 13 or 15 or 16 or 17 or 18 or 19 or 20 or 21 or 22            | 156,888   |
| 43 | 23 or 24 or 25 or 26 or 27 or 28 or 29 or 30 or 31 or 32 or 33 or 34 or 35 or 36 or 37 or 38 or 39 or 40 | 923,960   |
| 44 | 1 or 2 or 3 or 4                                                                                         | 218,126   |
| 45 | 42 and 43 and 44                                                                                         | 473       |
| 46 | 41 and 45                                                                                                | 128       |
| 47 | limit 46 to english language                                                                             | 125       |
| 48 | limit 47 to yr="2000 -Current"                                                                           | 125       |

## Database(s): EBSCO CINAHL Search Strategy:

| #   | Query                                                                                                                                                                                                                                | Results |
|-----|--------------------------------------------------------------------------------------------------------------------------------------------------------------------------------------------------------------------------------------|---------|
| S1  | TI ( (Access* n10 (barrier* or challeng* or restrict* or obstacle* or impediment* or difficult* or issue*)) ) OR AB ( (Access* n10 (barrier* or challeng* or restrict* or obstacle* or impediment* or difficult* or issue*)) )       | 28,922  |
| S2  | TI ( (Provision* n10 (barrier* or challeng* or restrict* or obstacle* or impediment* or difficult* or issue*)) ) OR AB ( (Provision* n10 (barrier* or challeng* or restrict* or obstacle* or impediment* or difficult* or issue*)) ) | 5,212   |
| S3  | TI ( Provide* n10 (barrier* or challeng* or restrict* or obstacle* or impediment* or difficult* or issue*)) ) OR AB ( Provide* n10 (barrier* or challeng* or restrict* or obstacle* or impediment* or difficult* or issue*)) )       | 41,065  |
| S4  | TI ( (Adoption* n10 (barrier* or challeng* or restrict* or obstacle* or impediment* or difficult* or issue*)) ) OR AB ( (Adoption* n10 (barrier* or challeng* or restrict* or obstacle* or impediment* or difficult* or issue*)) )   | 3,286   |
| S5  | (MH "Wheelchairs")                                                                                                                                                                                                                   | 5,024   |
| S6  | (MH "Orthoses")                                                                                                                                                                                                                      | 7,098   |
| S7  | (MH "Exoskeleton Devices")                                                                                                                                                                                                           | 453     |
| S8  | TI ( "Mobility device*" ) OR AB ( "Mobility device*" )                                                                                                                                                                               | 428     |
| S9  | TI "Mobility technolog*" OR AB "Mobility technolog*"                                                                                                                                                                                 | 49      |
| S10 | TI Wheelchair* OR AB Wheelchair*                                                                                                                                                                                                     | 6,404   |
| S11 | TI Scooter* OR AB Scooter*                                                                                                                                                                                                           | 444     |
| S12 | TI Walker* OR AB Walker*                                                                                                                                                                                                             | 4,060   |
| S13 | TI Prosthetic* OR AB Prosthetic*                                                                                                                                                                                                     | 12,806  |
| S14 | (MH "Limb Prosthesis")                                                                                                                                                                                                               | 2,890   |
| S15 | TI orthotic* OR AB orthotic*                                                                                                                                                                                                         | 2,832   |
| S16 | (MH "Assistive Technology Devices")                                                                                                                                                                                                  | 6,496   |
| S17 | TI Exoskeleton* OR AB Exoskeleton*                                                                                                                                                                                                   | 783     |



|     |                                                                                      |         |
|-----|--------------------------------------------------------------------------------------|---------|
| S18 | TI Orthose* OR AB Orthose*                                                           | 2,473   |
| S19 | TI "power mobility" OR AB "power mobility"                                           | 144     |
| S20 | TI "Prosthet* device*" OR AB "Prosthet* device*"                                     | 426     |
| S21 | TI ("Assistive technolog*" n10 mobility) OR AB ("Assistive technolog*" n10 mobility) | 128     |
| S22 | TI ("Assistive device*" n10 mobility) OR AB ("Assistive device*" n10 mobility)       | 149     |
| S23 | (MH "Persons with Disabilities")                                                     | 36,262  |
| S24 | (MH "Physical Mobility")                                                             | 7,277   |
| S25 | TI Elder* OR AB Elder*                                                               | 110,994 |
| S26 | TI "Physical* Disable*" OR AB "Physical* Disable*"                                   | 463     |
| S27 | TI Disable* OR AB Disable*                                                           | 13,488  |
| S28 | TI Disabilit* OR AB Disabilit*                                                       | 129,247 |
| S29 | TI "Walking difficult*" OR AB "Walking difficult*"                                   | 236     |
| S30 | TI Handicap* OR AB Handicap*                                                         | 6,419   |
| S31 | TI "physical* impair*" OR AB "physical* impair*"                                     | 1,722   |
| S32 | TI "physical* Challeng*" OR AB "physical* Challeng*"                                 | 407     |
| S33 | TI "Ambulat* Difficult*" OR AB "Ambulat* Difficult*"                                 | 27      |
| S34 | TI "Mobility difficult*" OR AB "Mobility difficult*"                                 | 164     |
| S35 | TI "Mobility impair*" OR AB "Mobility impair*"                                       | 795     |
| S36 | TI "Mobility limit*" OR AB "Mobility limit*"                                         | 934     |
| S37 | TI Amput* OR AB Amput*                                                               | 14,878  |

|            |                                                                                                                                                          |           |
|------------|----------------------------------------------------------------------------------------------------------------------------------------------------------|-----------|
| <b>S38</b> | TI "Motor difficult*" OR AB "Motor difficult*"                                                                                                           | 236       |
| <b>S39</b> | (MH "Amputation")                                                                                                                                        | 7,419     |
| <b>S40</b> | (MH "Geriatrics")                                                                                                                                        | 5,918     |
| <b>S41</b> | TI ( theor* OR framework* OR model* OR taxonom* OR classifi* OR concept* ) OR AB ( theor* OR framework* OR model* OR taxonom* OR classifi* OR concept* ) | 1,047,119 |
| <b>S42</b> | S1 OR S2 OR S3 OR S4                                                                                                                                     | 73,562    |
| <b>S43</b> | S5 OR S6 OR S7 OR S8 OR S9 OR S10 OR S11 OR S12 OR S13 OR S14 OR S15 OR S16 OR S17 OR S18 OR S19 OR S20 OR S21 OR S22                                    | 42,041    |
| <b>S44</b> | S23 OR S24 OR S25 OR S26 OR S27 OR S28 OR S29 OR S30 OR S31 OR S32 OR S33 OR S34 OR S35 OR S36 OR S37 OR S38 OR S39 OR S40                               | 294,686   |
| <b>S45</b> | S42 AND S43 AND S44                                                                                                                                      | 339       |
| <b>S46</b> | S41 AND S45                                                                                                                                              | 84        |
| <b>S47</b> | S41 AND S45 Limiters - Language: English                                                                                                                 | 80        |

Theories, models and frameworks to understand barriers to the provision of mobility assistive technologies: A scoping review

Appendix 2, Table. Characteristics of included papers

| Authors and Year                           | Study design                            | Aims of the study                                                                                                          | Population (n, characteristics)                      | Country                                 |
|--------------------------------------------|-----------------------------------------|----------------------------------------------------------------------------------------------------------------------------|------------------------------------------------------|-----------------------------------------|
| McIntyre, Cleland and Ramklass (2021) [42] | Qualitative, Semi-structured interviews | To explore facilitators and barriers to accessible wheelchair services                                                     | 11(8 occupational therapists and 3 physiotherapists) | South Africa                            |
| Dorjbal et al. (2020) [40]                 | Qualitative, Semi-structured interviews | To identify environmental barriers and their influence on daily life                                                       | 16(SCI patients)                                     | Mongolia                                |
| Jindal et al. (2018) [38]                  | Qualitative, Semi-structured interviews | To investigate parents' perceptions of rehabilitation and their information needs for their child with cerebral palsy (CP) | 18 (parents of children with CP)                     | India and Canada                        |
| Bhidayasiri et al. (2022) [43]             | Review article                          | To present clinical viewpoints on the unfulfilled needs of wearable technology, such as exoskeletons and orthoses          | N/A                                                  | N/A                                     |
| Layton (2012) [30]                         | Mixed method                            | To identify barriers and facilitators to optimal mobility from the perspective of AT users                                 | 100 (AT users. Neurological conditions)              | Australia, Survey, Open-ended responses |
| Mairami et al. (2017) [36]                 | Qualitative, case study, Semi-          | 1. To illustrate how AT influences stroke recovery and how the                                                             | 1(Stroke patient)                                    | Malaysia                                |

Theories, models and frameworks to understand barriers to the provision of mobility assistive technologies: A scoping review

|                                               |                                         |                                                                                                                              |                                                       |             |
|-----------------------------------------------|-----------------------------------------|------------------------------------------------------------------------------------------------------------------------------|-------------------------------------------------------|-------------|
|                                               | structured interview                    | environment might be altered to facilitate recovery<br>2. To examine the issues of AT affordability and accessibility        |                                                       |             |
| Dwyer and Mulligan (2015) [32]                | Literature review                       | To determine the obstacles and enablers for community reintegration as experienced by individuals with SCI                   | A total of 373 participants in the 7 included studies | New Zealand |
| Seymour, Geiger and Scheffler (2019) [39]     | Qualitative, Focus group                | To identify the issues associated with wheelchair provision and the elements that contribute to or mitigate these challenges | 21 (Community rehabilitation workers)                 | Uganda      |
| Gonçalves Junior, Knabben and Luz (2017) [35] | Qualitative, Semi-structured interviews | To demonstrate how people with lower limb amputation function and express their limitations                                  | 6 (patients with amputation)                          | Brazil      |
| Arthanat, Elsaesser and Bauer (2017) [34]     | Quantitative, Survey                    | To explore how AT providers perceive their education and training, the use of evidence and guidelines, financing policies.   | 318 (AT providers)                                    | US          |
| Gowran et al. (2021) [41]                     | Position Paper                          | To examine the global challenges related to wheelchair accessibility                                                         | N/A                                                   | N/A         |
| Steel and Layton (2016) [33]                  | Feature Article                         | An exploration of the complexities of AT provision in Australia                                                              | N/A                                                   | Australia   |
| Widehammar                                    | Qualitative, Semi-structured interviews | An exploration of how users' experiences of power mobility devices                                                           | 14(AT users)                                          | Sweden      |

Theories, models and frameworks to understand barriers to the provision of mobility assistive technologies: A scoping review

|                                         |                                                |                                                                                                              |                                                      |                |
|-----------------------------------------|------------------------------------------------|--------------------------------------------------------------------------------------------------------------|------------------------------------------------------|----------------|
| et al. (2020)<br>[37]                   |                                                | are influenced by environmental factors                                                                      |                                                      |                |
| Hammel et al. (2013)<br>[31]            | Qualitative, multiple case study, Focus groups | Multiple stakeholders' perspectives, issues, and priorities related to accessing, using, and evaluating MATs | 65(45 AT users, 10 caregivers, 10 service providers) | USA and Canada |
| Serres-Lafontaine et al. (2023)<br>[44] | Qualitative, photovoice method                 | To study how peer training affects social involvement                                                        | 10 Wheelchair users (SCI patients)                   | Tanzania       |

Theories, models and frameworks to understand barriers to the provision of mobility assistive technologies: A scoping review

**Appendix 3 Table. Propositions identified in the theories, models and frameworks**

| Name of the theory,<br>model or framework                                 | Propositions                                                                                                                                                                                                                                                                                                                                                                                                                                                                                                                                                                                                                                                                                                                                                                                                                        |
|---------------------------------------------------------------------------|-------------------------------------------------------------------------------------------------------------------------------------------------------------------------------------------------------------------------------------------------------------------------------------------------------------------------------------------------------------------------------------------------------------------------------------------------------------------------------------------------------------------------------------------------------------------------------------------------------------------------------------------------------------------------------------------------------------------------------------------------------------------------------------------------------------------------------------|
| International Classification of Functioning, Disability, and Health (ICF) | <ol style="list-style-type: none"> <li>1. A health condition can affect both the mental and physical body functions.</li> <li>2. An individual's activities are impacted by their health condition.</li> <li>3. Health conditions affect an individual's engagement in activities, determining their level of participation.</li> <li>4. External factors, for example, social factors, can either inhibit or facilitate an individual's level of functioning.</li> <li>5. Society may create barriers, for example, inaccessible services or lack of facilitators, such as the unavailability of AT, which can affect an individual's performance.</li> <li>6. An individual's functioning is affected by the presence or absence of services, for example, equipment, products, and technologies in their environment.</li> </ol> |

Theories, models and frameworks to understand barriers to the provision of mobility assistive technologies: A scoping review

---

7. External elements like systems and policies that regulate and facilitate the provision of services can impact a person's functional capacity.
  8. An individual's level of functioning can also be influenced by external factors such as support and relationships, including family, people in positions of authority, and health professionals.
  9. Personal factors of an individual represent their internal aspects, including psychological factors, that can affect their level of functioning.
  10. Individuals' functioning and disabilities are influenced by their health status as well as contextual factors, such as environmental and personal factors.
  11. Functioning is defined as encompassing body functions, body structures, activities, and participation.
-

Theories, models and frameworks to understand barriers to the provision of mobility assistive technologies: A scoping review

---

12. An impairment, an activity limitation, or a restriction on participation constitutes a disability.

---

Levesque's conceptual framework

1. The concept of approachability is related to the ability of individuals with health needs to recognise the existence of available services, access them, and receive effective healthcare that can improve their health.
  2. Cultural and social factors determine the acceptability of health services within their context.
  3. The reachability of health services depends on their physical presence and timeliness.
  4. Factors like personal mobility, transportation availability, adaptability in occupation, and knowledge of accessible health services are interconnected and contribute to an individual's capacity to access healthcare providers physically.
-



Theories, models and frameworks to understand barriers to the provision of mobility assistive technologies: A scoping review

---

5. The concept of affordability in healthcare refers to the ability of people to pay for services without causing undue financial hardship or affecting their ability to afford basic necessities.
  6. The ability to afford healthcare services is connected to a person's financial resources, including income, savings, and borrowing capacity.
  7. Appropriateness in healthcare refers to the fit between the services provided and the needs and preferences of clients, as well as the quality and safety of those services.
  8. Engaging in healthcare involves the active participation of clients in decision-making and treatment planning, which helps to ensure that care is aligned with their goals and values.
  9. Accessibility of health services is affected by the availability of information.
-

Theories, models and frameworks to understand barriers to the provision of mobility assistive technologies: A scoping review

---

10. Personal autonomy and the ability to choose care-seeking are linked to the ability to access health care.

---

The Human Activity Assistive Technology model (HAAT)

1. AT enhances an individual's capabilities to complete desired tasks.
  2. Human activities are essential, learnable, and influenced by societal and cultural contexts.
  3. The use of desired technology is influenced by human skills and abilities (physical, cognitive, emotional).
  4. An individual's ability to perform activities is affected by their skills and abilities (physical, cognitive, emotional).
  5. The use of AT to perform an activity is influenced by various factors in the environment, including physical, social, cultural, and institutional elements.
-

Theories, models and frameworks to understand barriers to the provision of mobility assistive technologies: A scoping review

- 
6. Choosing and implementing the right AT requires considering the interaction between different elements, including the activity being performed, the user's needs and abilities, and the broader environmental context in which the technology will be used.
  7. The process of performing an activity leads to a functional result of human performance.

---

Gibson's affordances theory

1. Cognition: Affordances exist as a cognitive process which comes through people and organisations interacting with material entities.
  2. Perception: Affordances need to be perceived or recognised by the person or organisation.
  3. Behaviour: the affordance is actualised as the behaviour that people/organisations adopt acting on the perceived opportunity for action.
-

Theories, models and frameworks to understand barriers to the provision of mobility assistive technologies: A scoping review

---

4. Evaluation: Evaluating the effects of this behaviour.

5. Environmental factors and structures can impact disabilities.

---

Systemic development model (SDM)

1. Understanding personal, organisational, and institutional capacity requires consideration of factors such as health, culture, economics, and politics.
  2. It is crucial to provide appropriate services to improve the health, well-being, and fundamental freedoms of individuals in need.
  3. Limited access to services can create a cycle of poverty and disability.
  4. Service delivery systems that are tailored to specific contexts play a significant role in ensuring appropriate service provision.
  5. Economic factors impact the availability of products and services
-

Theories, models and frameworks to understand barriers to the provision of mobility assistive technologies: A scoping review

---

and can affect the viability of service provision.

6. Evaluation of the quality, development, performance, and procurement standards of products is crucial for improving service delivery systems and individual health outcomes.
7. Political governance also plays a role in ensuring access to appropriate services.

---

Multi Intervention Paradigm for Assessment and Application of Concurrent Treatments (IMPACT<sup>2</sup>)

1. The results of interventions can be outlined by examining the six phases, including: 1) Pre-Intervention, 2) Context, 3) Baseline, 4) Intervention Strategies, 5) Outcome Covariates, and 6) Outcomes.
  2. Personal and contextual factors influence the devices and services used by individuals to perform activities.
-

Theories, models and frameworks to understand barriers to the provision of mobility assistive technologies: A scoping review

---

3. Universal design and health promotion are two methods that can be utilised to enhance functional performance.
  4. The context in which AT is used to perform a task within an environment is crucial for improving participation and QoL.
  5. Intervention approaches, such as reducing the impairment, compensating for the impairment, using AT, and redesigning the activity, are used to support the use of AT and optimise an individual's functioning.
  6. Consumer satisfaction is a desirable outcome of AT provision.
  7. Outcome(function) is defined as participation, QoL, and engagement.
  8. Cost influences the Intervention approaches therefore affecting Outcomes.
-

Theories, models and frameworks to understand barriers to the provision of mobility assistive technologies: A scoping review

Appendix 4, Table. Gaps analysis

| <b>Gaps</b>                                     | <b>Recommendations for future research</b>                                                                                                                                                                                                                                                                                                                                                                                          |
|-------------------------------------------------|-------------------------------------------------------------------------------------------------------------------------------------------------------------------------------------------------------------------------------------------------------------------------------------------------------------------------------------------------------------------------------------------------------------------------------------|
| Remote Regions and Accessibility                | Key areas for future investigation included examining access to AT in remote regions [30,42] by investigating challenges and barriers faced in remote regions [42].                                                                                                                                                                                                                                                                 |
| Stakeholder Perspectives                        | The included papers in this review draw attention to several issues, such as investigating policymakers' and HCPs' views on rehabilitation services [38]. Understanding the challenges faced by people with disabilities [44]. This includes understanding stakeholder perspectives on the various aspects of access by identifying the enablers and barriers that might aid in planning to increase access to AT services [39,42]. |
| Funding, Policy, and Legislation                | Future research should investigate funding and policy-related barriers [32,34,40], the impact of legislation on accessibility and participation for powered mobility device users [37], fostering low-cost approaches in low- and middle-income countries [36], and promoting inclusive solutions for wheelchair service provision [41,44].                                                                                         |
| Data Collection and methodological improvements | Adoption of standardised instruments to assess functioning and disability is needed [35,37]. Comparing perceptions users with and without AT [35,37]. Exploration of user                                                                                                                                                                                                                                                           |

Theories, models and frameworks to understand barriers to the provision of mobility assistive technologies: A scoping review

|                                                 |                                                                                                                                                                                                                        |
|-------------------------------------------------|------------------------------------------------------------------------------------------------------------------------------------------------------------------------------------------------------------------------|
|                                                 | satisfaction, choice, and control in relation to MATs and its impact on overall outcomes [31]. Development of standards for testing AT effectiveness [43].                                                             |
| Contextual Understanding and service evaluation | Importance of investigating in-country perspectives consideration of personal, social, economic, environmental, historical, and political factors [41]. Incorporating subjective measures in service evaluations [33]. |



Theories, models and frameworks to understand barriers to the provision of mobility assistive technologies: A scoping review

Appendix 5. Preferred Reporting Items for Systematic reviews and Meta-Analyses extension for Scoping Reviews (PRISMA-ScR) Checklist

| SECTION                           | ITEM | PRISMA-ScR CHECKLIST ITEM                                                                                                                                                                                                                                                                                  | REPORTED ON PAGE # |
|-----------------------------------|------|------------------------------------------------------------------------------------------------------------------------------------------------------------------------------------------------------------------------------------------------------------------------------------------------------------|--------------------|
| <b>TITLE</b>                      |      |                                                                                                                                                                                                                                                                                                            |                    |
| Title                             | 1    | Identify the report as a scoping review.                                                                                                                                                                                                                                                                   | 1                  |
| <b>ABSTRACT</b>                   |      |                                                                                                                                                                                                                                                                                                            |                    |
| Structured summary                | 2    | Provide a structured summary that includes (as applicable): background, objectives, eligibility criteria, sources of evidence, charting methods, results, and conclusions that relate to the review questions and objectives.                                                                              | 2                  |
| <b>INTRODUCTION</b>               |      |                                                                                                                                                                                                                                                                                                            |                    |
| Rationale                         | 3    | Describe the rationale for the review in the context of what is already known. Explain why the review questions/objectives lend themselves to a scoping review approach.                                                                                                                                   | 4                  |
| Objectives                        | 4    | Provide an explicit statement of the questions and objectives being addressed with reference to their key elements (e.g., population or participants, concepts, and context) or other relevant key elements used to conceptualize the review questions and/or objectives.                                  | 4                  |
| <b>METHODS</b>                    |      |                                                                                                                                                                                                                                                                                                            |                    |
| Protocol and registration         | 5    | Indicate whether a review protocol exists; state if and where it can be accessed (e.g., a Web address); and if available, provide registration information, including the registration number.                                                                                                             | 4 (not registered) |
| Eligibility criteria              | 6    | Specify characteristics of the sources of evidence used as eligibility criteria (e.g., years considered, language, and publication status), and provide a rationale.                                                                                                                                       | 4                  |
| Information sources*              | 7    | Describe all information sources in the search (e.g., databases with dates of coverage and contact with authors to identify additional sources), as well as the date the most recent search was executed.                                                                                                  | 6                  |
| Search                            | 8    | Present the full electronic search strategy for at least 1 database, including any limits used, such that it could be repeated.                                                                                                                                                                            | Appendix 1.        |
| Selection of sources of evidence† | 9    | State the process for selecting sources of evidence (i.e., screening and eligibility) included in the scoping review.                                                                                                                                                                                      | 6                  |
| Data charting process‡            | 10   | Describe the methods of charting data from the included sources of evidence (e.g., calibrated forms or forms that have been tested by the team before their use, and whether data charting was done independently or in duplicate) and any processes for obtaining and confirming data from investigators. | 6                  |
| Data items                        | 11   | List and define all variables for which data were sought and any assumptions and simplifications made.                                                                                                                                                                                                     | 6                  |

Theories, models and frameworks to understand barriers to the provision of mobility assistive technologies: A scoping review

| SECTION                                               | ITEM | PRISMA-ScR CHECKLIST ITEM                                                                                                                                                                             | REPORTED ON PAGE #          |
|-------------------------------------------------------|------|-------------------------------------------------------------------------------------------------------------------------------------------------------------------------------------------------------|-----------------------------|
| Critical appraisal of individual sources of evidence§ | 12   | If done, provide a rationale for conducting a critical appraisal of included sources of evidence; describe the methods used and how this information was used in any data synthesis (if appropriate). | NA                          |
| Synthesis of results                                  | 13   | Describe the methods of handling and summarizing the data that were charted.                                                                                                                          | 6                           |
| <b>RESULTS</b>                                        |      |                                                                                                                                                                                                       |                             |
| Selection of sources of evidence                      | 14   | Give numbers of sources of evidence screened, assessed for eligibility, and included in the review, with reasons for exclusions at each stage, ideally using a flow diagram.                          | 7                           |
| Characteristics of sources of evidence                | 15   | For each source of evidence, present characteristics for which data were charted and provide the citations.                                                                                           | 7 and Appendix 3            |
| Critical appraisal within sources of evidence         | 16   | If done, present data on critical appraisal of included sources of evidence (see item 12).                                                                                                            | NA                          |
| Results of individual sources of evidence             | 17   | For each included source of evidence, present the relevant data that were charted that relate to the review questions and objectives.                                                                 | 7-11, Table 3,4, Appendix 3 |
| Synthesis of results                                  | 18   | Summarize and/or present the charting results as they relate to the review questions and objectives.                                                                                                  | 10-17                       |
| <b>DISCUSSION</b>                                     |      |                                                                                                                                                                                                       |                             |
| Summary of evidence                                   | 19   | Summarize the main results (including an overview of concepts, themes, and types of evidence available), link to the review questions and objectives, and consider the relevance to key groups.       | 17                          |
| Limitations                                           | 20   | Discuss the limitations of the scoping review process.                                                                                                                                                | 18                          |
| Conclusions                                           | 21   | Provide a general interpretation of the results with respect to the review questions and objectives, as well as potential implications and/or next steps.                                             | 18                          |
| <b>FUNDING</b>                                        |      |                                                                                                                                                                                                       |                             |
| Funding                                               | 22   | Describe sources of funding for the included sources of evidence, as well as sources of funding for the scoping review. Describe the role of the funders of the scoping review.                       | 19                          |

JBI = Joanna Briggs Institute; PRISMA-ScR = Preferred Reporting Items for Systematic reviews and Meta-Analyses extension for Scoping Reviews.

\* Where *sources of evidence* (see second footnote) are compiled from, such as bibliographic databases, social media platforms, and Web sites.

† A more inclusive/heterogeneous term used to account for the different types of evidence or data sources (e.g., quantitative and/or qualitative research, expert opinion, and policy documents) that may be eligible in a scoping review as opposed to only studies. This is not to be confused with *information sources* (see first footnote).

‡ The frameworks by Arksey and O'Malley (6) and Levac and colleagues (7) and the JBI guidance (4, 5) refer to the process of data extraction in a scoping review as data charting.

§ The process of systematically examining research evidence to assess its validity, results, and relevance before using it to inform a decision. This term is used for items 12 and 19 instead of "risk of bias" (which is more applicable to systematic reviews of interventions) to include and acknowledge the various sources of evidence that

Theories, models and frameworks to understand barriers to the provision of mobility assistive technologies: A scoping review

may be used in a scoping review (e.g., quantitative and/or qualitative research, expert opinion, and policy document).

*From:* Tricco AC, Lillie E, Zarin W, O'Brien KK, Colquhoun H, Levac D, et al. PRISMA Extension for Scoping Reviews (PRISMAScR): Checklist and Explanation. *Ann Intern Med.* 2018;169:467–473. [doi: 10.7326/M18-0850](https://doi.org/10.7326/M18-0850)

For peer review only

# BMJ Open

## Theories, models and frameworks to understand barriers to the provision of mobility assistive technologies: A scoping review

|                                 |                                                                                                                                                                                                                                                                                                                                                                                                                                                                 |
|---------------------------------|-----------------------------------------------------------------------------------------------------------------------------------------------------------------------------------------------------------------------------------------------------------------------------------------------------------------------------------------------------------------------------------------------------------------------------------------------------------------|
| Journal:                        | <i>BMJ Open</i>                                                                                                                                                                                                                                                                                                                                                                                                                                                 |
| Manuscript ID                   | bmjopen-2023-080633.R1                                                                                                                                                                                                                                                                                                                                                                                                                                          |
| Article Type:                   | Original research                                                                                                                                                                                                                                                                                                                                                                                                                                               |
| Date Submitted by the Author:   | 27-Feb-2024                                                                                                                                                                                                                                                                                                                                                                                                                                                     |
| Complete List of Authors:       | Aldawood, Asma; The University of Sheffield, School of Medicine and Population Health; King Saud bin Abdulaziz University for Health Sciences, College of Applied Medical Sciences<br>Hind, Daniel; The University of Sheffield, School of Medicine and Population Health<br>Rushton, Simon; University of Sheffield, Department of Politics and International Relations<br>Field, Becky; The University of Sheffield, School of Medicine and Population Health |
| <b>Primary Subject Heading</b>: | Health services research                                                                                                                                                                                                                                                                                                                                                                                                                                        |
| Secondary Subject Heading:      | Health services research                                                                                                                                                                                                                                                                                                                                                                                                                                        |
| Keywords:                       | Health Services Accessibility, Self-Help Devices, Disabled Persons, Review                                                                                                                                                                                                                                                                                                                                                                                      |
|                                 |                                                                                                                                                                                                                                                                                                                                                                                                                                                                 |

SCHOLARONE™  
Manuscripts



I, the Submitting Author has the right to grant and does grant on behalf of all authors of the Work (as defined in the below author licence), an exclusive licence and/or a non-exclusive licence for contributions from authors who are: i) UK Crown employees; ii) where BMJ has agreed a CC-BY licence shall apply, and/or iii) in accordance with the terms applicable for US Federal Government officers or employees acting as part of their official duties; on a worldwide, perpetual, irrevocable, royalty-free basis to BMJ Publishing Group Ltd ("BMJ") its licensees and where the relevant Journal is co-owned by BMJ to the co-owners of the Journal, to publish the Work in this journal and any other BMJ products and to exploit all rights, as set out in our [licence](#).

The Submitting Author accepts and understands that any supply made under these terms is made by BMJ to the Submitting Author unless you are acting as an employee on behalf of your employer or a postgraduate student of an affiliated institution which is paying any applicable article publishing charge ("APC") for Open Access articles. Where the Submitting Author wishes to make the Work available on an Open Access basis (and intends to pay the relevant APC), the terms of reuse of such Open Access shall be governed by a Creative Commons licence – details of these licences and which [Creative Commons](#) licence will apply to this Work are set out in our licence referred to above.

Other than as permitted in any relevant BMJ Author's Self Archiving Policies, I confirm this Work has not been accepted for publication elsewhere, is not being considered for publication elsewhere and does not duplicate material already published. I confirm all authors consent to publication of this Work and authorise the granting of this licence.

1  
2  
3 **Theories, models and frameworks to understand barriers to the provision**  
4 **of mobility assistive technologies: A scoping review**  
5  
6  
7

8 Asma Aldawood<sup>1,2\*</sup>, Daniel Hind<sup>1</sup>, Simon Rushton<sup>3</sup>, Becky Field<sup>1</sup>  
9

10  
11 *1. School of Medicine and Population Health, The University of Sheffield, Sheffield, UK*  
12

13  
14 *2. King Saud bin Abdulaziz University for Health Sciences, Riyadh, Saudi Arabia*  
15

16  
17 *3. Department of Politics and International Relations, The University of Sheffield, Sheffield, UK.*  
18  
19  
20  
21  
22  
23

24 \*Corresponding author  
25

26 Email: [aaldawood2@sheffield.ac.uk](mailto:aaldawood2@sheffield.ac.uk) (AA)  
27  
28  
29  
30  
31  
32  
33  
34  
35  
36  
37  
38  
39  
40  
41  
42  
43  
44  
45  
46  
47  
48  
49  
50  
51  
52  
53  
54  
55  
56  
57  
58  
59  
60

## Abstract

**Objectives** There is strong evidence that mobility-assistive technologies improve occupational performance, social participation, educational and employment access, and overall quality of life in people with disabilities. However, people with disabilities still face barriers in accessing mobility products and related services. This review aims to summarise and synthesise: 1) theories, models, and frameworks that have been used to understand mobility-assistive technology access, 2) determinants of access, and 3) gaps in knowledge.

**Design** A Scoping review using the five-step Arksey and O'Malley Framework.

**Data sources** We searched the MEDLINE, EMBASE, CINAHL, and SCOPUS databases for publications published between 2000 and 2023. We searched for articles published up to 15 June 2023.

**Eligibility criteria** We included English-published literature in peer-reviewed journals that reported (a) barriers to the provision of mobility-assistive technologies, (b) including at least one theory, model, or framework, and (c) between 2000 and 2023.

**Data extraction and synthesis** We extracted the study characteristics, theories, models, framework usage, research recommendations, key findings on mobility-assistive technology barriers, and theoretical propositions. We conduct a theoretical synthesis guided by Turner's approach.

**Results** We included 17 articles using seven theories, models, and frameworks, synthesised into nine propositions. The synthesised theory emphasises that mobility is essential for human flourishing and that certain health conditions may impose restrictions on mobility. This impact can be alleviated by two direct determinants: (1) the provision of suitable services and (2) their comprehensive provision. Policies and costs influence these services indirectly. Environmental and personal factors also affect the use of these services. Ineffectively addressing these determinants can limit access to mobility-assistive technologies and subsequent disabilities.

**Conclusion** Our synthetic model describes the logic of providing evidence-based mobility-assistive technologies, and we identify the determinants of access which can act as targets for future work to improve mobility-assistive technologies provision.

## Strengths and limitations of this study

- We used a comprehensive search strategy developed with an information specialist to identify relevant publications.
- We mapped reported barriers to a widely used conceptual framework - the Consolidated Framework for Implementation Research - for consistent terminology.
- We conducted a theoretical synthesis to generate new insights.
- We excluded non-English studies, potentially limiting the applicability of our findings.
- We exclude grey literature, which further narrows the scope of the review.

For peer review only



## INTRODUCTION

Neurological conditions, musculoskeletal disorders, and ageing are associated with considerable human burdens, including decreased quality of life (QoL) [1,2], activity limitations [3], participation restrictions [4,5], increased dependence, and caregiver burden [6]. Mobility-assistive technologies (MATs) are vital for addressing the challenges posed by these conditions, as they can help improve QoL, promote independence, enhance occupational performance, increase participation, and alleviate the burden on individuals, families, and societies [7]. MATs encompass assistive products for mobility and related systems and services [7]. These assistive products include devices, software, or instruments specifically designed or widely available to enhance the functioning of an individual [8]. They support or substitute the ability to move, thereby facilitating movement from one location to another [8]. Examples include wheelchairs, walking frames, rollators, and prosthetic and orthotic products [8].

Wheeled mobility products, prosthetics, and orthotics are cost-effective for improving the QoL and independence of people with disabilities [9,10]. Despite being endorsed by the United Nations [11] and World Health Organization (WHO) [7], which are essential for creating equitable opportunities for people with disabilities, access to these MATs remains limited [7,12]. There is a considerable unmet need for MATs worldwide, with only a small percentage of those who require them having access [7,12]. Access to assistive technology (AT) is defined as the equitable and sustainable provision of assistive products and support services that adhere to six key principles: accessibility, affordability, availability, adaptability, acceptability, and quality [7]. These principles ensure that assistive products and services are reachable, cost-effective, adaptable to individual needs, culturally appropriate, widely available, and of high quality [7].

The reasons for the unmet need for MATs are poorly understood but include the absence of national policies, high costs, and insufficiently trained personnel [7]. Several pre-existing theories, models, and frameworks (TMFs) have been used to understand the determinants of access and uptake, each with different conceptual coverage and terminology, which could help plan corrective actions. A framework is a structure for organising concepts that enable the description of phenomena [13,14]. For instance, Levesque's conceptual framework defines five dimensions of healthcare accessibility: approachability, acceptability, availability, affordability, and appropriateness [15]. The International Classification of Functioning, Disability, and Health framework (ICF) is a framework developed by the WHO that classifies the health and disability components of functioning and contextual factors [16]. These include multi-aspect concepts related to body functions, structures, activities, participation, and environmental factors [16].

A model is a simplified representation of reality that holds for a specific case or population [13,17,18]; models may describe the relationship between their components but tend to be descriptive rather than explanatory [13]. For example, the Human Activity Assistive Technology (HAAT) model describes the interaction between human activity, AT, and the physical, social, and cultural contexts in which it is used [19]. The integrated multi-intervention paradigm for the assessment and application of concurrent treatments (IMPACT<sup>2</sup>) model describes the variables related to AT interventions [20]. The Matching Person and Technology (MPT) is a model that describes the interaction between environmental, personal, and technological factors in the success of AT uptake [21]. The Systemic Development Model (SDM), developed by the World Engagement Institute (WEI), describes four interconnected pillars of sustainability—health, culture, economics, and politics—to enhance the understanding of capacities at the personal, organisational, and institutional levels [22].

A theory is an interconnected set of abstract statements that explain, predict, or prescribe phenomena, going beyond specific contexts to consider broader meanings and implications [13,14,17,23]. For instance, Gibson's theory proposes that the environment contains actionable (and

therefore explanatory) properties, "affordances", that are directly perceived [24]. When a research area is characterised by theoretical incoherence, researchers must choose between rigid empiricism, selecting theories based on their virtues, developing their own theory, and theoretical synthesis [25]. Theoretical synthesis can amalgamate propositions from different theories into a propositional network, enabling researchers to extend the coverage, content validity, and document points of convergence [25]. Scoping reviews are ideal for uncovering key concepts and informing future research designs [26]. This paper presents a scoping review that summarises and synthesises the TMFs used to understand MAT access, identifies the determinants of access, and highlights the gaps in current knowledge.

## METHOD

We report a five-stage scoping review based on the approach outlined by Arksey and O'Malley [27], in line with the Preferred Reporting Items for Systematic Reviews and Meta-Analyses extension for Scoping Reviews (PRISMA-ScR) (online supplemental appendix 1) [28]. This study did not meet the eligibility requirements for registration using PROSPERO. The research questions were as follows: What theories, models, and frameworks have been used to understand the barriers to the provision of MATs for people with mobility issues? What are the determinants of access to MATs for people with mobility issues? What are the current knowledge gaps in access to MATs for people with mobility issues?

### Eligibility criteria

The Behaviour of Interest, Health Context, Exclusion, Models, or Theories (BeHEMOTH) framework [29] was employed to formulate the search concepts (Table 1) and eligibility criteria (Table 2).

**Table 1 Application of the BeHEMOTH framework to define search concepts**

| BeHEMOTH                           | Concept                              |
|------------------------------------|--------------------------------------|
| <b>Be – Behaviour of interest:</b> | Barriers to access or provision      |
| <b>H – Health context</b>          | People with mobility issues AND MATs |
| <b>E – Exclusions</b>              | NA                                   |
| <b>MoTh – Models or Theories</b>   | Models or Theories or Frameworks     |

**Table 2 Inclusion and exclusion criteria**

| Inclusion criteria                                              | Exclusion criteria                                         | Rationale                                                              |
|-----------------------------------------------------------------|------------------------------------------------------------|------------------------------------------------------------------------|
| Publications reporting on the barriers to the provision of MATs | Publication concentrates on aspects other than barriers to | This review focuses on understanding barriers to the provision of MATs |

|                                                               |                                                                |                                                                                                   |
|---------------------------------------------------------------|----------------------------------------------------------------|---------------------------------------------------------------------------------------------------|
|                                                               | access, and there is no report on barriers                     |                                                                                                   |
| Publications including at least a theory, model, or framework | Publications that did not employ a theory, model, or framework | To ensure that the articles concentrate on theory, model, or framework to understand the barriers |
| Publications in peer-reviewed journals                        | Other publications such as conference abstracts and theses     | To ensure that studies had undergone rigorous evaluation                                          |
| Publications published in the English language                | Publications in other languages                                | Costs and time commitment associated with article translation                                     |
| Publications between 2000 and 2023                            | Publication published before 2000                              | To ensure using the most relevant publications from the previous 23 years                         |

## Information sources and Searches

Literature searches were performed by (AA) on MEDLINE (Ovid), EMBASE (Ovid), CINAHL (EBSCO), and SCOPUS databases for studies published between 1 January 2000 and 15 June 2023. To identify the appropriate publications relevant to the research issue, a *priori* search strategy was established in collaboration with the authors (AA and DH) and an information specialist (FZ). The search terms combined the concepts of ‘barriers to provision, mobility issues, AND ‘MATs’, and a theory/model/framework’. Free text terms, subject heading, use of the Boolean operators "AND" and "OR", and truncation were all used to ensure a successful search. The final search strategy was tested on MEDLINE via Ovid, and then translated into other databases. The full search strategy and results are presented in online supplemental appendix 2. We reviewed the reference lists of the included articles to identify additional relevant articles [27] but restricted the eligibility to peer-reviewed studies, excluding grey literature.

## Study selection

The Rayyan platform (<https://www.rayyan.ai>) was used for study selection. Initial title and abstract screening were conducted by (AA), where the primary aim was to assess studies for potential relevance based on predefined inclusion and exclusion criteria. Given the subjective nature of this assessment, any uncertainties regarding study eligibility encountered by AA were systematically discussed with the other reviewers (DH, SR, and BF). Full-text screening involved consistent discussions among (AA, DH, SR, and BF), and the full texts of eligible articles were subsequently retrieved for a more detailed assessment.

## Data charting process

To facilitate consistent data presentation and synthesis, we charted general and study-specific information from the studies in Microsoft Excel spreadsheets. Data items included country of origin, study population, aims, sample size, study design, data collection tool, TMF used, a brief description of its purpose, research recommendations, and key findings related to barriers to the provision of MATs. We extracted theoretical propositions from the TMFs, as discussed in the articles included in our review. In instances in which these articles did not provide a comprehensive explanation of TMFs, such as Gibson's affordances theory, the IMPACT<sup>2</sup> model, and the HAAT model, we referred to the foundational sources. The sources cited within the included articles are original materials in which TMFs were first introduced or explained thoroughly. This ensured that our understanding and coverage of TMFs was comprehensive, especially when the application of these TMFs in the reviewed articles lacked depth. Although these foundational sources were not directly included in our review as they did not meet our inclusion criteria, they were consulted for additional insights. We mapped the reported barriers to one of the updated constructs of the Consolidated Framework for Implementation Research (CFIR), a synthetic framework of constructs used in 19 implementation theories [30,31], using a codebook (<https://cfirguide.org/>). The CFIR provides a set of standardised constructs to guide researchers, creating a common language for explicitly and consistently describing aspects that may affect the provision [32].

## Synthesis of results

Tabular summaries and narrative syntheses were completed for the included articles and their TMFs [33]. We conducted a theoretical synthesis to generate new insights that were unavailable for any TMF [34]. The synthesis was guided by Turner's [35] approach. In Step 1, the TMFs are summarised, and their shared themes are identified. In Step 2, the aspects of the TMF that pertain to core concepts by extracting the phrases used, their definitions, and their explicit and implicit relationships are identified. In Step 3, the TMFs are broken into simple propositions that can be compared and tabulated. In Step 4, the theories are compared and determined how they converge or diverge by combining similar elements. In Step 5, the convergent elements from the TMF are combined into a single conceptual model that focuses on the relationships between concepts. For example, during this stage, we examined how concepts from these TMFs—such as cost, services, and activity (mobility)—interacted and influenced each other within the synthesised theory to gain theoretical insight. We incorporated statements from the studies included in this review to strengthen the synthesis and support the resulting conceptual model (Step 6).

## Gaps analysis

To identify knowledge gaps and areas for future research, we reviewed papers and tabulated explicit recommendations, which is a core function of scoping reviews [26].

## Patients and public involvement

No patients or public were involved in the study.

## RESULTS

### Characteristics of the studies

The literature search yielded 291 citations after the removal of duplicates. A total of 235 citations were excluded after initial screening, and 56 potentially eligible articles were retrieved for full-text review. Of these, 42 were excluded because barriers were not reported ( $n=9$ ), TMFs were not reported ( $n=25$ ), and the citations were conference abstracts ( $n=7$ ) or theses ( $n=1$ ). Fourteen studies identified from the databases met all the eligibility criteria. After reviewing the reference lists and conducting manual searches, 24 additional studies were identified and examined for eligibility, and three studies were determined to be eligible (Figure 1) [36].

#### Figure 1 PRISMA flow diagram.

The final synthesis included 17 articles (online supplemental appendix 3) [21,22,37–51]. Eight studies addressed the challenges associated with the provision and use of MATs [21,22,37,38,41,43,46,48,49]. Four studies examined environmental barriers to participation [39,44,47,50,51]. Two studies explored the experiences of patients and caregivers and their rehabilitation needs [42,45]. One study drew attention to inconsistencies in AT provision schemes [40]. There were ( $n=5$ ) secondary studies and ( $n= 12$ ) primary research studies conducted between 2012 and 2023 in South Africa [48], Mongolia [47], Canada, India [45], Australia [37,40], Malaysia [43], New Zealand [39], Uganda [46], Brazil [42], United States [41], Sweden [21,44], Tanzania [50], Canada, and the United States [38]. The primary studies contained between one and 318 participants.

Seven TMFs, representing various perspectives, were identified. Two were biopsychosocial in orientation: the ICF [16] and HAAT [19], which focused on AT. Two other models that focus on AT are IMPACT<sup>2</sup> [20] and MPT [21]. Three other identified TMFs were applied to AT access: Levesque's theoretical framework [15], Gibson's affordances theory [24], and the SDM [52]. The most frequently used TMF was ICF ( $n = 12$ ). All included studies applied one TMF, except for one [40], which used two in combination: ICF and IMPACT<sup>2</sup>. There are three distinct applications of TMFs, as shown in Figure 2. The majority were used as a basis for analysis and interpretation ( $n = 12$ ) or as a guide for designing the surveys and interviews ( $n = 2$ ). In addition, TMFs were used as a comprehensive framework to provide a context for reviewing the relevant literature ( $n = 3$ ).

#### Figure 2 Theories, models, frameworks, and their purpose of application in eligible studies.

### Barriers to MATs provision synthesised using CFIR

The key barriers in the innovation domain are cost concerns [22,37–41,43,45,47,48], intervention complexity [22,38,44,46], inadequate evidence of effectiveness [40,41], product-related factors such as comfort, durability, and fit [51]; and limited models and colour choices available [21] (Figure 3). The outer-setting domain highlights societal attitudes toward AT [21,46,47,49,51], geographic distance [40,42,48], a lack of supportive legislation [22,38,44,46,47,49,50], and environmental barriers [21,51]. Within the inner-setting domain, resource constraints [22,41,42,46,48], restricted knowledge, and information access hinder provision [22,37,38,41,46,49]. The characteristics of the individuals' domains revealed knowledge about the intervention [22,46,47,49] and low self-efficacy among healthcare professionals [41,48] as barriers to its adoption. In addition, within the



1  
2  
3 characteristics of individual domains, barriers include limited information access [37–39,42,44,48],  
4 lack of awareness among users [48,49], and insufficient inclusion of user preferences in prescriptions  
5 [21]. In the process domain, barriers include insufficient stakeholder engagement [38,41,49], absence  
6 of interdisciplinary standards [41], and limited strategic planning [38].  
7  
8

9 **Figure 3 Barriers to the provision of MATs synthesised using the CFIR.**

## 11 **Theories, Models and Frameworks (TMF) Synthesis**

12 The propositions derived from the theories, models, and frameworks are described in Supplemental  
13 Appendix 4, and the resulting synthetic model is presented in Figure 4.  
14

15 **Figure 4 Synthetic model.**

### 17 **Proposition 1: mobility is essential for human flourishing**

18 The ICF framework highlights activity as a key component of health, with disabilities resulting from  
19 restricted activities, such as mobility issues [16]. This affects participation in everyday activities, such  
20 as work, socialisation, and healthcare access [16]. The HAAT model explains a similar concept,  
21 describing the ‘activity’ as the action of performing a task that represents the functional outcome of  
22 human performance [19]. Building on these insights, ‘mobility’ is viewed as an individual's ability to  
23 perform tasks that enable meaningful participation. The HAAT model and IMPACT<sup>2</sup> emphasise the  
24 importance of participation in everyday activities, such as working and socialising, for overall health  
25 [19,20], describing it as "necessary to human existence"[19]. According to the HAAT model, humans  
26 are defined based on their intrinsic physical, cognitive, and emotional abilities [19]. Accordingly,  
27 mobility is viewed more as a necessary means of meaningful participation than an end to the  
28 development of physical, cognitive, and psychosocial skills throughout life [37,45].  
29  
30  
31  
32  
33  
34  
35  
36  
37  
38

### 39 **Proposition 2: health conditions and personal factors influence mobility**

40 An individual's mobility is influenced by health and personal factors, which, in turn, affect their  
41 participation in social, work, and leisure activities. For example, the ICF framework clearly describes  
42 how health issues and personal factors can affect activities and participation [16] and describes health  
43 conditions as umbrella terms for diseases, disorders, injuries, or trauma [16]. Similarly, the HAAT  
44 model highlights the impact of a person's physical and cognitive abilities and personal elements, such  
45 as emotional and psychological factors, on their ability to perform activities [46]. Accordingly,  
46 'personal factors' that encompass elements, such as psychological attributes, age, and coping style  
47 influence an individual's ability to perform activities [16]. For example, Dwyer and Mulligan [39]  
48 highlighted how emotional changes caused by spinal cord injury (SCI) could impede participation in  
49 rehabilitation services and other areas of reintegration, such as employment and leisure activities.  
50  
51  
52  
53  
54

### 55 **Proposition 3: appropriate services influence mobility**

56 The ICF and HAAT models explicitly describe the relationships between the activities and their  
57 environments. Both emphasise the importance of activities for participating in and developing in life,  
58 and some interventions can improve a person's ability to engage in the desired activities [16,19]. For  
59  
60

1  
2  
3 instance, in the ICF framework, AT services are considered to be an environmental factor, which is  
4 appropriate for helping individuals achieve their intended activities and participate in various  
5 situations [16]. Similarly, the MPT model proposes that AT acts as an essential means of bridging the  
6 gap between an individual's capabilities and the demands of tasks in their environment, thereby  
7 significantly enhancing their engagement in the desired activities [21]. Levesque's framework  
8 identifies that 'the appropriateness of a service' is determined by its alignment with the needs of the  
9 client, whereas the HAAT and MPT models emphasise that with AT, an individual's capabilities are  
10 increased [15,19,21]. Consequently, to meet individual needs and maximise capabilities, we define the  
11 appropriateness of services based on the extent to which they are tailored. This demonstrates that  
12 MATs are vital for people with disabilities and for older people who require them, thus enhancing  
13 their independence and participation in daily life [37,45].  
14  
15  
16  
17

#### 18 **Proposition 4: service delivery must be comprehensive to influence human** 19 **mobility**

20  
21  
22 Institutional factors significantly influence individual activities, as explained by the HAAT model  
23 [19] and ICF frameworks [16]. Levesque's framework emphasises the importance of how services are  
24 provided to meet client needs [15]. Similarly, the IMPACT<sup>2</sup> model is concerned with providing  
25 services and ensuring that outcomes are met, including QOL, participation, and satisfaction with the  
26 services provided [20]. The MPT model demonstrates that user satisfaction with service provision can  
27 be achieved by considering key features of products such as usability, quality, weight, stability, and  
28 safety [21]. Accordingly, the concept of 'comprehensive services' refers to providing clients with  
29 high-quality products and the necessary support services to meet their needs and achieve satisfaction.  
30 Providing comprehensive services encompassing assessment, training, and maintenance is crucial for  
31 enhancing personal mobility [22,38]. Effective delivery of AT services requires well-trained  
32 personnel [22]. These are critical components of service delivery systems that help individuals  
33 enhance their mobility.  
34  
35  
36  
37  
38

#### 39 **Proposition 5: environmental factors influence individuals' decision to seek** 40 **appropriate health care services**

41  
42  
43 Assistive products for mobility and participation are influenced by environmental factors such as  
44 social, cultural, and physical environments, which affect individuals' health and well-being. The ICF  
45 framework views disability as a health experience arising from context and not solely within an  
46 individual [16]. It emphasises how society can create barriers such as inaccessible services or  
47 neglected facilitators, such as the lack of AT [16]. Furthermore, an individual's level of functioning is  
48 determined by their relationships with family, people, and healthcare providers, all of which can  
49 influence their decision to seek healthcare [16]. A similar concept of how society affects activities is  
50 highlighted by the HAAT model, which places particular emphasis on an individual's cultural context  
51 [19]. The MPT model also emphasises the role of sociocultural factors, acknowledging how a user's  
52 social setting and cultural attitudes towards disability can influence their perception of and adoption  
53 of mobility products. This includes consideration of product-related social implications and stigmas  
54 [21]. For example, parents of children with disabilities oppose wheelchairs because of social stigma  
55 [45], and some older people perceive mobility products negatively because of stigmatising symbolism  
56 [49]. This demonstrates the significant influence of sociocultural factors, such as support and  
57 relationships from family, health professionals, and community on MAT accessibility and acceptance.  
58  
59  
60

1  
2  
3 Furthermore, the MPT model emphasises the importance of the physical environment, which includes  
4 both the built environment within the user's home and the external surroundings, in affecting use and  
5 acceptance [21]. For example, if a wheelchair does not fit the physical and psychosocial environment  
6 in which it is used, it is more likely to limit function rather than enhance it [21]. Therefore, the  
7 success of MAT is not measured solely by its technical features but also by its ability to fit into the  
8 user's psychosocial context [21].  
9  
10

### 11 12 **Proposition 6: policies influence the provision of services** 13

14 The SDM framework highlights how organisational service delivery policies influence appropriate  
15 service provision [52], whereas the ICF explains how policies affect participation and activities [16].  
16 As part of the ICF, the term 'policy' is commonly used within the environmental factor domain as an  
17 external factor that can impact an individual's health and function [16]. This set of guidelines, rules,  
18 and regulations governs the range of services provided to individuals, including policies and standards  
19 that define the eligibility criteria for services [45]. For instance, prostheses are not considered to be  
20 life-saving medical devices or crucial components of the healthcare system [42]. However, they are  
21 life-changing for users and can quickly restore most functions [42]. Levesque's framework argues that  
22 the availability of health services implies that those in need can access either the physical space or  
23 healthcare personnel [15]. Therefore, individuals cannot access healthcare if it is unavailable in their  
24 geographic areas or if insurance does not cover their treatment [15]. This can prevent individuals from  
25 receiving the required healthcare, which can adversely affect their health. Disparities between  
26 government and institutional policies can result in confusion among AT providers and decrease  
27 service utilisation [22,46].  
28  
29  
30  
31  
32

### 33 **Proposition 7: cost influences the provision of appropriate services** 34

35 The SDM framework [52] highlights the significant influence of economic factors on service delivery  
36 and reinforces the idea that costs can significantly influence access to healthcare services. The term  
37 'cost' refers to the expenses incurred by individuals and healthcare systems to provide services  
38 [15,20]. This comprises the direct prices of services such as consultation fees, product costs, and  
39 related expenses [15]. For instance, the IMPACT<sup>2</sup> model underlines the role of cost implications in  
40 selecting intervention approaches and demonstrating the cost effects at each stage of AT provision  
41 [20]. According to Levesque et al. [15], an individual's ability to generate economic resources such as  
42 income is critical. Therefore, costs can play a significant role in determining AT use and access.  
43  
44  
45  
46

### 47 **Proposition 8: personal factors influence healthcare utilisation** 48

49 Healthcare utilisation is influenced by various 'personal factors' that represent an individual's internal  
50 aspects, such as psychological characteristics [16]. This concept is explained using Levesque's  
51 framework. It highlights factors such as an individual's need for care, awareness of these needs, and  
52 desire for treatment [15]. Gibson's affordance theory suggests that an individual's perception of their  
53 environment is based on its potential to fulfil their needs, thereby shaping their decisions [24].  
54 Therefore, the individual is responsible for unravelling the utility presented by affordance. For  
55 instance, the client in Mairami et al. [43] adapted a chair from a home to a wheelchair. This  
56 demonstrates how the client's perception of their environment shaped their recovery when an existing  
57 structure was found to have assistive potential. The ICF model explains the significance of  
58  
59  
60



1  
2  
3 environmental factors, such as the visibility of services, in determining an individual's level of  
4 functioning [16], which is related to Gibson's affordance theory, in which environmental cues trigger  
5 actions [24]. Consequently, the lack of service limits the activities that can be conducted. Personal  
6 factors not classified within the ICF are acknowledged to have a significant impact on healthcare  
7 access [16]. The MPT model highlights that the choice of assistive products is deeply personal and  
8 shaped by individual aspirations, anticipated satisfaction of needs, and perceived personal value of  
9 these products [21]. These elements play a crucial role in influencing the uptake of MATs, as they are  
10 associated with the context of users' lives [21].  
11  
12  
13  
14  
15

### 16 **Proposition 9: limited access to healthcare services creates disability**

17  
18 The ICF acknowledges the influence of environmental factors on disability development and  
19 emphasises the limitations it imposes on individuals' abilities to access healthcare services and engage  
20 in social activities [16]. As defined by the ICF, disabilities include impairments, limitations in activity  
21 levels, and restrictions on participation [16]. Consequently, restricted AT accessibility impairs body  
22 function, hinders participation, and contributes to disabilities. The SDM framework explains the  
23 significance of economic factors, particularly the "lack of economic means", which limit access to  
24 services such as MAT [52]. Restricted access can trigger continuous cycles of disabilities and poverty  
25 [22]. Persistent mobility constraints, whether due to inadequate MAT service support or diminished  
26 participation in daily life, have been identified as significant factors leading to disability [46,47].  
27  
28  
29  
30

### 31 **Gaps analysis**

32  
33 This review highlights key research areas in AT services that warrant further investigation (online  
34 supplemental appendix 5). Investigations should focus on AT access in remote regions [37,45,48];  
35 stakeholder perspectives concerning rehabilitation services and AT access barriers [46,48,50]; and  
36 funding, policy, and legislation challenges [21,22,39,41,43,47,50]. Data collection and  
37 methodological enhancements are required, including standardised instruments for assessing  
38 functioning and disability [42,44], comparisons of user experiences with and without AT [38,40], and  
39 comprehensive evaluation tools combining objective and subjective measures [38,40]. Emphasis  
40 should also be placed on understanding the in-country perspectives, inclusive solutions, and the  
41 impact of contextual factors on AT access [22]. This involves evaluating how new products impact  
42 workplace settings and determining which types of AT are essential [21]. Future studies should  
43 examine product compatibility, enhance user skills, and improve accessibility to the built environment  
44 [51]. Addressing these research gaps could contribute to the development of more effective, inclusive,  
45 and accessible AT services for individuals with disabilities.  
46  
47  
48  
49

## 50 **DISCUSSION**

51  
52 This scoping review offers a summary of the barriers to MAT provision and synthesis theories to  
53 guide future work based on 17 articles. The synthesised theory emphasises that mobility is essential  
54 for human flourishing (Proposition 1) and that certain health conditions may impose restrictions on  
55 mobility (Proposition 2). This impact can be ameliorated by two direct determinants: the provision of  
56 suitable services (Proposition 3) and their comprehensive provision (Proposition 4). Policies  
57 (Proposition 6) and costs (Proposition 7) indirectly influence these services. Furthermore, an  
58 individual's decision to access these services is determined by their environment (Proposition 5) and  
59  
60

1  
2  
3 personal factors (Proposition 8). If these direct and indirect determinants are not effectively addressed,  
4 it could result in limited access to MATs and subsequent disability (Proposition 9). This synthesised  
5 theory integrates empirical and ethical dimensions and provides evidence-based approaches to solving  
6 problems [17].  
7

8 To the best of our knowledge, this is the first report on the synthesis of TMFs and the barriers  
9 to MAT provision. Although De Alves and Matsukura's [53] literature review outlined the various  
10 theoretical models used in the AT literature, they did not attempt theoretical synthesis. TMFs organise  
11 concepts and thoughts to provide insights into different elements of practice and research [13].  
12 Lakatos proposes that scientific enquiry should appraise a series of theories rather than a single  
13 theory, noting that “the members of such series of theories are usually connected by a remarkable  
14 continuity which welds them into research programmes” [54]. Lakatos advocated for a 'pluralistic  
15 model' of scientific theories, in which several theories, which are organised deductively to varying  
16 degrees, are brought together in a unified approach [54]. Unlike Lakatos, we view this study as an  
17 enhancement of problem-solving effectiveness [55]. By combining propositions from different  
18 theories, we increased the coverage of the resulting syntheses of individual theories. It should predict  
19 the range of barriers encountered in MAT access and provision.  
20  
21

22 The theory covers a socially significant issue given that it addresses the current research  
23 priorities identified by expert panels organised by government agencies and clinical speciality  
24 organisations [7,56–58]. It addresses the phenomenon of interest to rehabilitation scholars by filling  
25 the gaps in the existing TMFs. An adequate specification was achieved by providing a clear and  
26 concise overview of the theoretical synthesis. In addition, we establish linkage adequacy by defining  
27 the concepts and their relationships [59]. The theory is testable because it contains observable  
28 concepts and propositions that can be operationalised and corroborated in empirical research. A  
29 limitation of the scoping review was the exclusion of non-English language studies, which could limit  
30 the applicability of the findings; research from other languages could have offered additional valuable  
31 insights [60]. Another limitation is that the review's focus on studies from 2000 to 2023 potentially  
32 omitted earlier relevant research on barriers and TMF. However, a broader historical scope may have  
33 reduced the relevance of the findings to contemporary decision-making in the provision of AT. The  
34 exclusion of grey literature, including government reports and policy documents, further narrowed the  
35 scope of the review. This exclusion may have resulted in the omission of relevant non-peer-reviewed  
36 TMFs. In addition, the processes of data extraction, coding using CFIR, and synthesis inherently  
37 involve subjectivity. Search terms such as 'service delivery,' 'service\*,' 'deliver\*,' and additional or  
38 alternative terms for older people, such as 'older person\*' or 'older adult\*,' may have identified  
39 additional studies.  
40  
41

42 The insights from this review and the resulting integrated model have the potential to  
43 influence clinical practice and policymaking in line with the ethical imperatives outlined by the WHO  
44 and the UN [7,11]. These organisations have emphasised the necessity of AT to meet individual needs  
45 and enable equitable opportunities for people with disabilities. The synthesised theory aligns with the  
46 principles of access to AT as advocated by the WHO and UNICEF, highlighting the necessity for  
47 assistive products and services to be reachable, affordable, adaptable to individual needs and  
48 environments, culturally appropriate, and of high quality. By addressing the direct and indirect  
49 determinants of access, as identified in the theory, including service provision, policies, costs,  
50 physical, social, cultural factors, and personal preferences, we can align better with these global  
51 principles [7]. Therefore, this review proposes a theoretical basis for reforming the existing system to  
52 align it with international standards, thus addressing the pressing and unmet needs more equitably and  
53 personally. To achieve this, future research must examine these determinants, understand the barriers  
54 to MAT provision, and plan and evaluate strategies to enhance its provision. Having a set of  
55  
56  
57  
58  
59  
60

determinants organised around the CFIR [31] allows the creation of local implementation strategies to suit different policy jurisdictions.

There is a consensus [61,62] and evidence-based approach [63] to overcome the barriers to effective AT provision found in this review. The barriers identified by the CFIR can be linked to Expert Recommendations for Implementing Change (ERIC) strategies [64]. These strategies guide the selection of implementation methods to mitigate barriers and include (1) activating local clinical leaders or champions, (2) providing educational materials, (3) organising meetings, and (4) implementing outreach or ongoing training. The implementation of these strategies can assist decision-makers in making informed choices regarding the selection of strategies for MAT provision.

## CONCLUSION

The synthesised theory emphasises that mobility is a crucial aspect of human life and certain health conditions may restrict mobility. Providing comprehensive and appropriate services can reduce this impact; however, cost and policy decisions regarding these services affect their provision. Accessibility to these services is also affected by environmental and personal factors. This knowledge can be used to develop strategies to enhance provision.

## ACKNOWLEDGEMENTS

The authors thank Louise Falzon of the School of Medicine and Population Health at the University of Sheffield. She provided invaluable assistance in refining our search strategy. We would also like to thank the University of Sheffield Institutional Open Access Fund for its funding towards the research. This work was previously presented at the 17th International Conference of the Association for the Advancement of Assistive Technology in Europe (AAATE 2023) held in Paris between 30 August and 1 September 2023.

## CONTRIBUTORS

All authors contributed to the conceptualisation and design of the study. Initial title and abstract screening were conducted by AA, with regular consultations with DH, SR, and BF. AA performed the data extraction independently, with regular discussions with DH, SR, and BF. The initial data synthesis was conducted by AA and refined by DH, SR, and BF. The manuscript was drafted by AA, and major revisions were made by DH, SR, and BF. All the authors (AA, DH, SR, and BF) have read and approved the final manuscript.

## FUNDING

This study received no specific grants from any funding agency in the public, commercial, or not-for-profit sectors.

## COMPETING INTERESTS

The authors report there are no competing interests to declare.

## DATA AVAILABILITY STATEMENT

The authors confirm that the data supporting the findings of this study are available in the article and supplementary materials.

## RIGHTS RETENTION STATEMENT

For the purpose of open access, the author has applied for a Creative Commons Attribution (CC BY) licence to any author-accepted manuscript version.

## SUPPORTING MATERIALS

Appendix 1, Checklist. Preferred Reporting Items for Systematic reviews and Meta-Analyses extension for Scoping Reviews (PRISMA-ScR)

Appendix 2, Table. Systematic search conducted in MEDLINE, EMBASE, CINAHL, and SCOPUS

Appendix 3, Table. Characteristics of included papers

Appendix 4, Table. Propositions derived from the theories, models, and frameworks

Appendix 5, Table. Gaps analysis

## ORCID iDs

Asma Aldawood, <https://orcid.org/0000-0003-4670-4348>

Daniel Hind, <https://orcid.org/0000-0002-6409-4793>

Simon Rushton, <https://orcid.org/0000-0003-1055-9871>

Becky Field, <https://orcid.org/0000-0003-3502-2691>

## Ethical Approval and Dissemination:

Ethical approval was not required for this scoping review. The dissemination plan includes publishing in peer-reviewed journals and presenting at academic conferences.

## REFERENCES

- 1 Shafrin J, Sullivan J, Goldman DP, *et al.* The association between observed mobility and quality of life in the near elderly. *PLoS One* 2017;**12**:e0182920. PMID: 28827806
- 2 Bechtold U, Stauder N, Fieder M. Let's Walk It: Mobility and the Perceived Quality of Life in Older Adults. *Int J Environ Res Public Health* 2021;**18**:11515. PMID: 34770028
- 3 Musich S, Wang SS, Ruiz J, *et al.* The impact of mobility limitations on health outcomes among older adults. *Geriatr Nurs.* 2018;**39**:162–9. PMID: 28866316
- 3 World Health Organization and World Bank. World report on disability. Geneva: *World Health Organization*; 2011. Available from: <https://www.who.int/publications/i/item/9789241564182>
- 4 van Hees SGM, van den Borne BHP, Menting J, *et al.* Patterns of social participation among older adults with disabilities and the relationship with well-being: A latent class analysis. *Arch Gerontol Geriatr* 2020;**86**:103933. PMID: 31542633.
- 6 Achilike S, Beauchamp JES, Cron SG, *et al.* Caregiver Burden and Associated Factors among Informal Caregivers of Stroke Survivors. *Journal of Neuroscience Nursing* 2020;**52**:277–83. PMID: 33156591.
- 7 World Health Organization. Global report on assistive technology. Geneva: World Health Organization; 2022. Available from: <https://www.who.int/publications/i/item/9789240049451>
- 8 ISO 9999:2022; International Organization for Standardization Assistive Products—Classification and Terminology. ISO: Geneva, Switzerland, 2022
- 9 Hagberg L, Hermansson L, Fredriksson C, *et al.* Cost-effectiveness of powered mobility devices for elderly people with disability. *Disabil Rehabil Assist Technol* 2017;**12**:115–120. PMID: 25634493.
- 10 Frossard L, Ferrada L, Quincey T, *et al.* Cost-effectiveness of transtibial bone-anchored prostheses using osseointegrated fixation: From challenges to preliminary data. *Journal of Prosthetics and Orthotics* 2021;**33**:184–195. doi:10.1097/JPO.0000000000000372.
- 11 United Nations. United Nations Convention on the Rights of Persons with Disabilities. United Nations; 2007.
- 12 Danemayer J, Boggs D, Delgado Ramos V, *et al.* Estimating need and coverage for five priority assistive products: a systematic review of global population-based research. *BMJ Glob Health* 2022;**7**:e007662. PMID: 35101862.
- 13 Nilsen P. Making sense of implementation theories, models and frameworks. *Implement Sci.* 2015;**10**:53. PMID: 25895742
- 14 Press C, Yon D, Heyes C. Building better theories. *Curr Biol.* 2022;**32**:R13–7. PMID: 35015984

- 1  
2  
3 15 Levesque J-F, Harris MF, Russell G. Patient-centred access to health care: conceptualising access at  
4 the interface of health systems and populations. *Int J Equity Health* 2013;**12**:18. PMID: 23496984.  
5  
6 16 World Health Organization. International classification of functioning, disability and health: ICF.  
7 Geneva: WHO; 2001.  
8  
9 17 Fawcett J. An overview of conceptual models, theories, and research. In: Fawcett J, editor. *The*  
10 *relationship of theory and research*. 3rd ed. Philadelphia (PA): F.A. Davis Company; 1999. p. 1–25.  
11  
12 18 Passey D. Theories, theoretical and conceptual frameworks, models and constructs: Limiting research  
13 outcomes through misconceptions and misunderstandings. *Studies in Technology Enhanced Learning*.  
14 2020;1. doi: 10.21428/8C225F6E.56810A1A  
15  
16 19 Cook A, Polgar J. Activity, human, and context: the human doing an activity in context. In: Cook A,  
17 Polgar J, editors. *Assistive technologies: principles and practice*. 4th ed. St. Louis (MO): Mosby;  
18 2015. p. 40–67.  
19  
20 20 Smith RO. IMPACT2 Model. Rehabilitation Research Design and Disability Center. 2005. Available  
21 from: <https://uwm.edu/r2d2/methods/impact2-model/>.  
22  
23 21 Oskar K, Dennis P, Björn L, *et al*. Prescribers' experience of active wheelchair provisioning in  
24 Sweden: Analysis of a postal questionnaire. *Technol Disabil*. 2011;**23**:183–9. doi: 10.3233/TAD-  
25 2011-0316  
26  
27 22 Gowran RJ, Bray N, Goldberg M, *et al*. Understanding the global challenges to accessing appropriate  
28 wheelchairs: Position paper. *Int J Environ Res Public Health* 2021;**18**:3338. PMID: 33804868.  
29  
30 23 Gregor S. The nature of theory in Information Systems. *MIS Q*. 2006;**30**:611–42.  
31 doi.org/10.2307/25148742  
32  
33 24 Gibson JJ. *The ecological approach to visual perception: classic edition*. New York and London:  
34 Psychology Press; 2014.  
35  
36 25 Denzin NK. *The Research Act: A Theoretical Introduction to Sociological Methods*. 1st ed. USA  
37 (New York): Transaction publishers; 2009. Chapter 12, Strategies of multiple triangulation; p. 234-  
38 247.  
39  
40 26 Khalil H, Tricco AC. Differentiating between mapping reviews and scoping reviews in the evidence  
41 synthesis ecosystem. *J Clin Epidemiol* 2022;**149**:175–182. PMID: 35636593.  
42  
43 27 Arksey H, O'Malley L. Scoping studies: towards a methodological framework. *Int J Soc Res*  
44 *Methodol* 2005;**8**:19–32. doi:10.1080/1364557032000119616.  
45  
46 28 Tricco AC, Lillie E, Zarin W, *et al*. PRISMA Extension for Scoping Reviews (PRISMA-ScR):  
47 Checklist and Explanation. *Ann Intern Med* 2018;**169**:467–473 PMID: 30178033.  
48  
49 29 Booth A, Carroll C. Systematic searching for theory to inform systematic reviews: is it feasible? Is it  
50 desirable? *Health Info Libr J* 2015;**32**:220–235. PMID: 26095232  
51  
52 30 Damschroder LJ, Aron DC, Keith RE, *et al*. Fostering implementation of health services research  
53 findings into practice: a consolidated framework for advancing implementation science. *Implement*  
54 *Sci* 2009;**4**:50. PMID: 19664226.  
55  
56  
57  
58  
59  
60



- 1  
2  
3 31 Damschroder LJ, Reardon CM, Widerquist MAO, *et al.* The updated Consolidated Framework for  
4 Implementation Research based on user feedback. *Implementation Science* 2022 17:1. 2022;17:1–16.  
5 PMID: 36309746  
6  
7  
8 32 Keith RE, Crosson JC, O'Malley AS, *et al.* Using the Consolidated Framework for Implementation  
9 Research (CFIR) to produce actionable findings: a rapid-cycle evaluation approach to improving  
10 implementation. *Implement Sci* 2017;12:15. PMID: 28187747.  
11  
12  
13 33 Popay J, Roberts H, Sowden A, Petticrew M, Arai L, Rodgers M, *et al.* Guidance on the conduct of  
14 narrative synthesis in systematic reviews. Prod ESRC Methods Programme Version. 2006;1: b92.  
15 doi:10.13140/2.1.1018.4643.  
16  
17  
18 34 Pound P, Campbell R. Exploring the feasibility of theory synthesis: A worked example in the field of  
19 health related risk-taking. *Soc Sci Med* 2015;124:57–65. doi:10.1016/j.socscimed. PMID: 25461862.  
20  
21  
22 35 Turner JH. Developing Cumulative and Practical Knowledge through Metatheorizing. *Sociological*  
23 *Perspectives* 1991;34:249–268. doi:10.2307/1389510.  
24  
25  
26 36 Page MJ, McKenzie JE, Bossuyt PM, *et al.* The PRISMA 2020 statement: an updated guideline for  
27 reporting systematic reviews. *BMJ* 2021;372:n71 PMID: 33782057.  
28  
29  
30 37 Layton N. Barriers and Facilitators to Community Mobility for Assistive Technology Users. *Rehabil*  
31 *Res Pract* 2012;2012:1–9. PMID: 23029617.  
32  
33  
34 38 Hammel J, Southall K, Jutai J, *et al.* Evaluating use and outcomes of mobility technology: a multiple  
35 stakeholder analysis. *Disabil Rehabil Assist Technol* 2013;8:294–304. PMID: 23137189.  
36  
37  
38 39 Dwyer K, Mulligan H. Community reintegration following spinal cord injury: Insights for health  
39 professionals in community rehabilitation services in New Zealand. *New Zealand Journal of*  
40 *Physiotherapy* 2015;43:75–85. doi:10.15619/NZJP/43.3.02.  
41  
42  
43 40 Steel EJ, Layton NA. Assistive Technology in Australia: Integrating theory and evidence into action.  
44 *Aust Occup Ther J* 2016;63:381–390. PMID: 27086661.  
45  
46  
47 41 Arthanat S, Elsaesser L-JJ, Bauer S. A survey of assistive technology service providers in the USA.  
48 *Disabil Rehabil Assist Technol* 2017;12:789–800. PMID: 28125297.  
49  
50  
51 42 Gonçalves E, Knabben J, Luz C. Portraying the amputation of lower limbs: an approach using ICF.  
52 *Fisioterapia em Movimento* 2017;30:97–106. doi:10.1590/1980-5918.030.001.ao10.  
53  
54  
55 43 Mairami FF, Allotey P, Warren N, *et al.* Adaptive invention: independence and mobility through  
56 modifications. *Disabil Rehabil Assist Technol* 2018; 13:658–664. PMID: 28836873.  
57  
58  
59 44 Widehammar C, Lidström Holmqvist K, Pettersson I, *et al.* Attitudes is the most important  
60 environmental factor for use of powered mobility devices–users' perspectives. *Scand J Occup Ther*  
2020;27:298–308. PMID: 30856033.  
61  
62  
63 45 Jindal P, MacDermid J, Rosenbaum P, *et al.* Perspectives on rehabilitation of children with cerebral  
64 palsy: exploring a cross-cultural view of parents from India and Canada using the international  
65 classification of functioning, disability and health. *Disabil Rehabil* 2018;40:2745–55. PMID:  
66 28747138.

- 1  
2  
3 46 Seymour N, Geiger M, Scheffler E. Community-based rehabilitation workers' perspectives of  
4 wheelchair provision in Uganda: A qualitative study. *Afr J Disabil* 2019;**8**: 2226-7220. PMID:  
5 31061818.  
6  
7  
8 47 Dorjbal D, Prodingler B, Zanini C, *et al.* Living with spinal cord injury in Mongolia: A qualitative  
9 study on perceived environmental barriers. *J Spinal Cord Med* 2020;**43**:518–31. PMID: 30633693.  
10  
11 48 McIntyre J, Cleland K, Ramklass S. Access to wheelchairs by persons with mobility impairment in a  
12 remote rural district of KwaZulu-Natal, South Africa: therapists' perspectives. *Rural Remote Health*  
13 2021;**21**:5855. PMID: 33478230.  
14  
15  
16 49 Bhidayasiri R, Maytharakcheep S, Phumphid S, *et al.* Improving functional disability in patients with  
17 tremor: A clinical perspective of the efficacies, considerations, and challenges of assistive technology.  
18 *J Neurol Sci* 2022;**435**:120197.PMID: 35220112.  
19  
20  
21 50 Serres-Lafontaine A de, Labbé D, Batcho CS, *et al.* Social participation of individuals with spinal  
22 injury using wheelchairs in rural Tanzania after peer training and entrepreneurial skills training. *Afr J*  
23 *Disabil* 2023;**12**. PMID: 36756462  
24  
25  
26 51 Smith EM, Sakakibara BM, Miller WC. A review of factors influencing participation in social and  
27 community activities for wheelchair users. *Disabil Rehabil Assist Technol*. 2016;**11**:361–74. PMID:  
28 25472004  
29  
30  
31 52 World Engagement Institute. Sustainable Capacity—Systemic Development Model. 2012 Available  
32 from: <http://www.weinstitute.org/methods.html>  
33  
34  
35 53 de Jesus Alves AC, Matsukura TS. Theoretic models for recommendation and implementation of  
36 assistive technology 1. *Cadernos de Terapia Ocupacional da UFSCar* 2016;**24**:591.  
37 doi:10.4322/0104-4931.ctoAO1078.  
38  
39  
40 54 Lakatos I. Falsification and the Methodology of Scientific Research Programmes. In: *Lakatos I,*  
41 *Musgrave A, editors. Criticism and the Growth of Knowledge.* Cambridge: Cambridge University  
42 Press; 1970. p. 91–196  
43  
44  
45 55 Long DM. Pragmatism, realism, and psychology: Understanding theory selection criteria. *J*  
46 *Contextual Behav Sci* 2013;**2**:61–7. doi:10.1016/J.JCBS.2013.09.003.  
47  
48  
49 56 Satpute S, Cooper R, Dicianno BE, *et al.* Mini-review: Rehabilitation engineering: Research priorities  
50 and trends. *Neurosci Lett* 2021;**764**:136207. PMID: 34478814.  
51  
52  
53 57 Best K, Smith E, Pellichero A, Sorita E, Archambault P, Kenyon L, *et al.* International research  
54 priorities on the role of cognition in power mobility device use: In pursuit of informed clinical  
55 practices and knowledge translation. *Assistive Technology*. 2021; **35**(2): 119-126. PMID: 34293271  
56  
57  
58 58 Alqahtani S, Joseph J, Dicianno B, *et al.* Stakeholder perspectives on research and development  
59 priorities for mobility assistive-technology: a literature review. *Disabil Rehabil Assist Technol*  
60 2021;**16**:362–76. PMID: 31535934.  
59  
60 59 Fawcett J. Evaluating Conceptual-Theoretical-Empirical Structures for Research. In: Fawcett J. *The*  
*relationship of theory and research*. 3rd ed. Philadelphia: F.A. Davis Company; 1999. p.85-117.



- 1  
2  
3 60 Stern C, Kleijnen J. Language bias in systematic reviews: You only get out what you put in. *JBI Evid Synth* 2020;**18**:1818–9. doi:10.11124/JBIES-20-00361.
- 4  
5  
6 61 Powell BJ, McMillen JC, Proctor EK, *et al.* A Compilation of Strategies for Implementing Clinical  
7 Innovations in Health and Mental Health. *Medical Care Research and Review* 2012;**69**:123–57.  
8 PMID: 22203646.  
9  
10  
11 62 Powell BJ, Waltz TJ, Chinman MJ, *et al.* A refined compilation of implementation strategies: Results  
12 from the Expert Recommendations for Implementing Change (ERIC) project. *Implementation Science*  
13 2015;**10**:1–14. PMID: 25889199.  
14  
15  
16 63 Powell BJ, Fernandez ME, Williams NJ, *et al.* Enhancing the Impact of Implementation Strategies in  
17 Healthcare: A Research Agenda. *Front Public Health* 2019;**7**. PMID: 30723713  
18  
19 64 Waltz TJ, Powell BJ, Fernández ME, *et al.* Choosing implementation strategies to address contextual  
20 barriers: Diversity in recommendations and future directions. *Implementation Science* 2019;**14**:1–15.  
21 PMID: 31036028.  
22  
23  
24  
25  
26  
27  
28  
29  
30  
31  
32  
33  
34  
35  
36  
37  
38  
39  
40  
41  
42  
43  
44  
45  
46  
47  
48  
49  
50  
51  
52  
53  
54  
55  
56  
57  
58  
59  
60

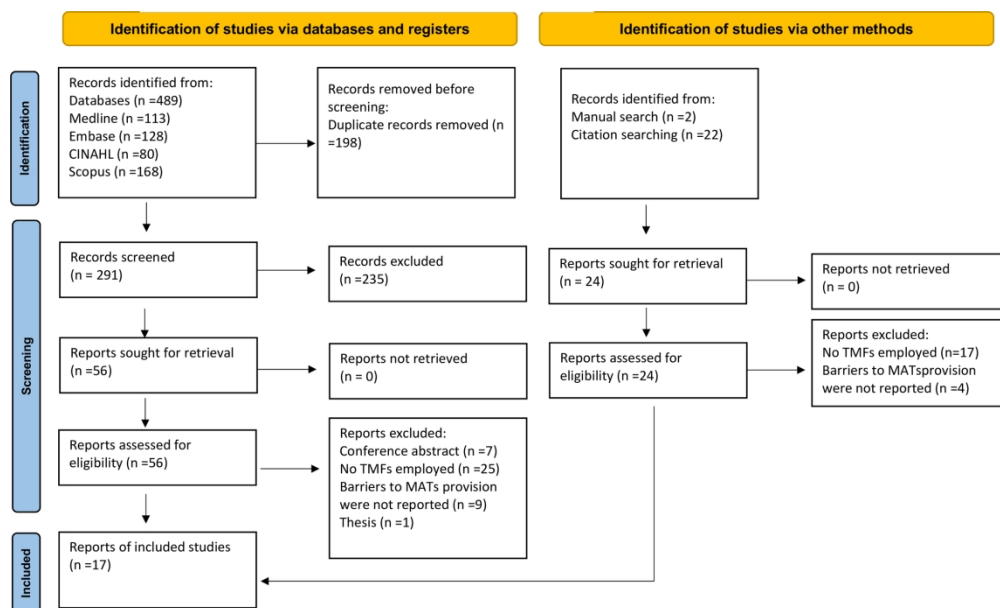

Figure 1 PRISMA flow diagram

190x114mm (300 x 300 DPI)

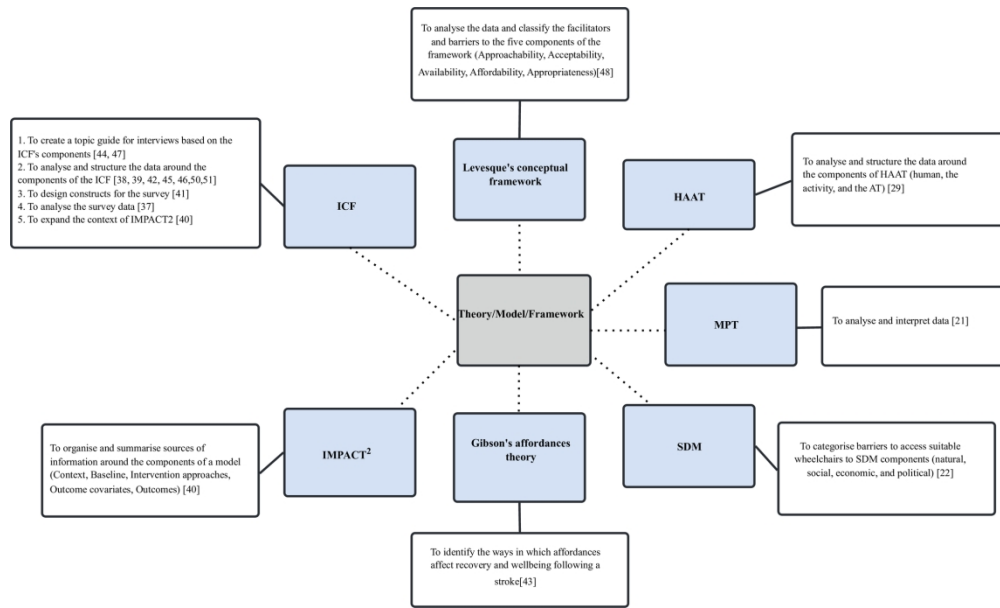

Figure 2 Theories, models, frameworks, and their purpose of application in eligible studies

190x114mm (300 x 300 DPI)

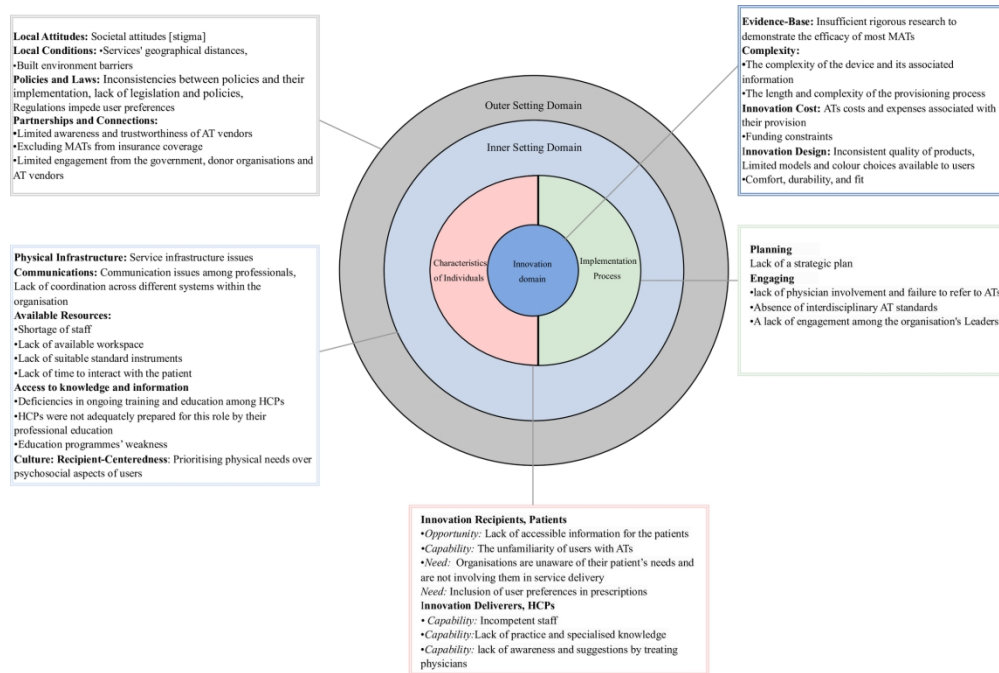

Figure 3 Barriers to the provision of MATs synthesised using the CFIR

190x127mm (300 x 300 DPI)

1  
2  
3  
4  
5  
6  
7  
8  
9  
10  
11  
12  
13  
14  
15  
16  
17  
18  
19  
20  
21  
22  
23  
24  
25  
26  
27  
28  
29  
30  
31  
32  
33  
34  
35  
36  
37  
38  
39  
40  
41  
42  
43  
44  
45  
46  
47  
48  
49  
50  
51  
52  
53  
54  
55  
56  
57  
58  
59  
60

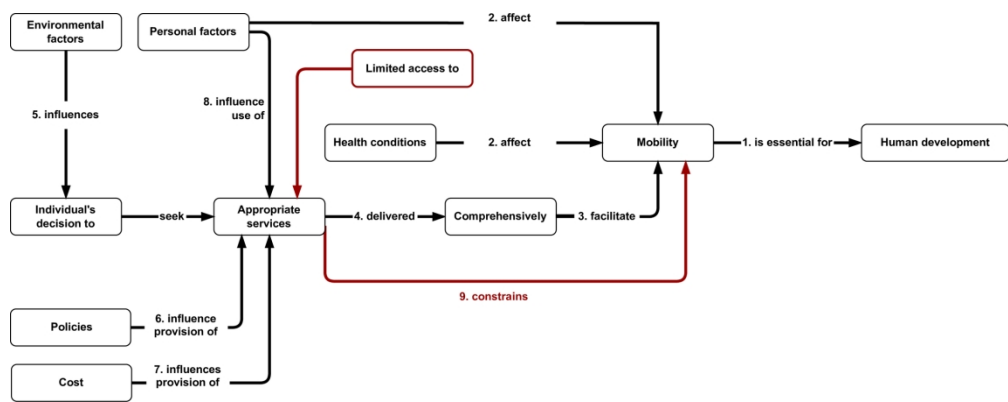

Figure 4 Synthetic model  
190x74mm (300 x 300 DPI)

Theories, models and frameworks to understand barriers to the provision of mobility assistive technologies: A scoping review

Appendix 1. Preferred Reporting Items for Systematic reviews and Meta-Analyses extension for Scoping Reviews (PRISMA-ScR) Checklist

| SECTION                           | ITEM | PRISMA-ScR CHECKLIST ITEM                                                                                                                                                                                                                                                                                  | REPORTED ON PAGE #  |
|-----------------------------------|------|------------------------------------------------------------------------------------------------------------------------------------------------------------------------------------------------------------------------------------------------------------------------------------------------------------|---------------------|
| <b>TITLE</b>                      |      |                                                                                                                                                                                                                                                                                                            |                     |
| Title                             | 1    | Identify the report as a scoping review.                                                                                                                                                                                                                                                                   | #1                  |
| <b>ABSTRACT</b>                   |      |                                                                                                                                                                                                                                                                                                            |                     |
| Structured summary                | 2    | Provide a structured summary that includes (as applicable): background, objectives, eligibility criteria, sources of evidence, charting methods, results, and conclusions that relate to the review questions and objectives.                                                                              | #2                  |
| <b>INTRODUCTION</b>               |      |                                                                                                                                                                                                                                                                                                            |                     |
| Rationale                         | 3    | Describe the rationale for the review in the context of what is already known. Explain why the review questions/objectives lend themselves to a scoping review approach.                                                                                                                                   | #4-5                |
| Objectives                        | 4    | Provide an explicit statement of the questions and objectives being addressed with reference to their key elements (e.g., population or participants, concepts, and context) or other relevant key elements used to conceptualize the review questions and/or objectives.                                  | #5                  |
| <b>METHODS</b>                    |      |                                                                                                                                                                                                                                                                                                            |                     |
| Protocol and registration         | 5    | Indicate whether a review protocol exists; state if and where it can be accessed (e.g., a Web address); and if available, provide registration information, including the registration number.                                                                                                             | #5 (not registered) |
| Eligibility criteria              | 6    | Specify characteristics of the sources of evidence used as eligibility criteria (e.g., years considered, language, and publication status), and provide a rationale.                                                                                                                                       | #5-6                |
| Information sources*              | 7    | Describe all information sources in the search (e.g., databases with dates of coverage and contact with authors to identify additional sources), as well as the date the most recent search was executed.                                                                                                  | #6                  |
| Search                            | 8    | Present the full electronic search strategy for at least 1 database, including any limits used, such that it could be repeated.                                                                                                                                                                            | Appendix 1.         |
| Selection of sources of evidence† | 9    | State the process for selecting sources of evidence (i.e., screening and eligibility) included in the scoping review.                                                                                                                                                                                      | #6                  |
| Data charting process‡            | 10   | Describe the methods of charting data from the included sources of evidence (e.g., calibrated forms or forms that have been tested by the team before their use, and whether data charting was done independently or in duplicate) and any processes for obtaining and confirming data from investigators. | #6                  |
| Data items                        | 11   | List and define all variables for which data were sought and any assumptions and simplifications made.                                                                                                                                                                                                     | #6                  |

Theories, models and frameworks to understand barriers to the provision of mobility assistive technologies: A scoping review

| SECTION                                               | ITEM | PRISMA-ScR CHECKLIST ITEM                                                                                                                                                                             | REPORTED ON PAGE #           |
|-------------------------------------------------------|------|-------------------------------------------------------------------------------------------------------------------------------------------------------------------------------------------------------|------------------------------|
| Critical appraisal of individual sources of evidence§ | 12   | If done, provide a rationale for conducting a critical appraisal of included sources of evidence; describe the methods used and how this information was used in any data synthesis (if appropriate). | NA                           |
| Synthesis of results                                  | 13   | Describe the methods of handling and summarizing the data that were charted.                                                                                                                          | #6                           |
| <b>RESULTS</b>                                        |      |                                                                                                                                                                                                       |                              |
| Selection of sources of evidence                      | 14   | Give numbers of sources of evidence screened, assessed for eligibility, and included in the review, with reasons for exclusions at each stage, ideally using a flow diagram.                          | #7                           |
| Characteristics of sources of evidence                | 15   | For each source of evidence, present characteristics for which data were charted and provide the citations.                                                                                           | #7-8 and Appendix 3          |
| Critical appraisal within sources of evidence         | 16   | If done, present data on critical appraisal of included sources of evidence (see item 12).                                                                                                            | NA                           |
| Results of individual sources of evidence             | 17   | For each included source of evidence, present the relevant data that were charted that relate to the review questions and objectives.                                                                 | #7-8, Figure 2,3, Appendix 3 |
| Synthesis of results                                  | 18   | Summarize and/or present the charting results as they relate to the review questions and objectives.                                                                                                  | #8-12                        |
| <b>DISCUSSION</b>                                     |      |                                                                                                                                                                                                       |                              |
| Summary of evidence                                   | 19   | Summarize the main results (including an overview of concepts, themes, and types of evidence available), link to the review questions and objectives, and consider the relevance to key groups.       | #12                          |
| Limitations                                           | 20   | Discuss the limitations of the scoping review process.                                                                                                                                                | #13                          |
| Conclusions                                           | 21   | Provide a general interpretation of the results with respect to the review questions and objectives, as well as potential implications and/or next steps.                                             | #13-14                       |
| <b>FUNDING</b>                                        |      |                                                                                                                                                                                                       |                              |
| Funding                                               | 22   | Describe sources of funding for the included sources of evidence, as well as sources of funding for the scoping review. Describe the role of the funders of the scoping review.                       | #14                          |

JBI = Joanna Briggs Institute; PRISMA-ScR = Preferred Reporting Items for Systematic reviews and Meta-Analyses extension for Scoping Reviews.

\* Where *sources of evidence* (see second footnote) are compiled from, such as bibliographic databases, social media platforms, and Web sites.

† A more inclusive/heterogeneous term used to account for the different types of evidence or data sources (e.g., quantitative and/or qualitative research, expert opinion, and policy documents) that may be eligible in a scoping review as opposed to only studies. This is not to be confused with *information sources* (see first footnote).

‡ The frameworks by Arksey and O'Malley (6) and Levac and colleagues (7) and the JBI guidance (4, 5) refer to the process of data extraction in a scoping review as data charting.

§ The process of systematically examining research evidence to assess its validity, results, and relevance before using it to inform a decision. This term is used for items 12 and 19 instead of "risk of bias" (which is more applicable to systematic reviews of interventions) to include and acknowledge the various sources of evidence that

Theories, models and frameworks to understand barriers to the provision of mobility assistive technologies: A scoping review

may be used in a scoping review (e.g., quantitative and/or qualitative research, expert opinion, and policy document).

*From:* Tricco AC, Lillie E, Zarin W, O'Brien KK, Colquhoun H, Levac D, et al. PRISMA Extension for Scoping Reviews (PRISMA ScR): Checklist and Explanation. *Ann Intern Med.* 2018;169:467–473. [doi: 10.7326/M18-0850](https://doi.org/10.7326/M18-0850)

For peer review only



## Appendix 2. Systematic search conducted in MEDLINE, EMBASE and CINAHL, SCOPUS

Database(s): Ovid MEDLINE(R) Search Strategy:

| #  | Query                                                                                                              | Results from 25 Jan 2024 |
|----|--------------------------------------------------------------------------------------------------------------------|--------------------------|
| 1  | (Access* adj10 (barrier* or challeng* or restrict* or obstacle* or impediment* or difficult* or issue*)).ab,ti.    | 64,598                   |
| 2  | (Provision* adj10 (barrier* or challeng* or restrict* or obstacle* or impediment* or difficult* or issue*)).ab,ti. | 7,907                    |
| 3  | (Provide* adj10 (barrier* or challeng* or restrict* or obstacle* or impediment* or difficult* or issue*)).ab,ti.   | 104,059                  |
| 4  | (Adoption* adj10 (barrier* or challeng* or restrict* or obstacle* or impediment* or difficult* or issue*)).ab,ti.  | 7,541                    |
| 5  | Wheelchairs/                                                                                                       | 5,496                    |
| 6  | Orthotic Devices/                                                                                                  | 6,985                    |
| 7  | Exoskeleton Device/                                                                                                | 1,592                    |
| 8  | Mobility device*.ab,ti.                                                                                            | 536                      |
| 9  | Mobility technolog*.ab,ti.                                                                                         | 51                       |
| 10 | Wheelchair*.ab,ti.                                                                                                 | 8,831                    |
| 11 | Scooter*.ab,ti.                                                                                                    | 840                      |
| 12 | Walker*.ab,ti.                                                                                                     | 15,385                   |
| 13 | Prosthetic*.ab,ti.                                                                                                 | 64,198                   |
| 14 | prosthesis/                                                                                                        | 50,184                   |
| 15 | orthotic*.ab,ti.                                                                                                   | 3,738                    |
| 16 | Self-Help Devices/                                                                                                 | 5,821                    |
| 17 | Exoskeleton*.ab,ti.                                                                                                | 4,672                    |
| 18 | Orthos*.ab,ti.                                                                                                     | 26,208                   |
| 19 | power mobility.ab,ti.                                                                                              | 133                      |
| 20 | Prosthe* device*.ab,ti.                                                                                            | 2,414                    |
| 21 | (Assistive technolog* adj10 mobility).ab,ti.                                                                       | 134                      |
| 22 | (Assistive device* adj10 mobility).ab,ti.                                                                          | 211                      |
| 23 | assistive product*.ab,ti.                                                                                          | 107                      |
| 24 | mobility product*.ab,ti.                                                                                           | 24                       |
| 25 | Disabled Persons/                                                                                                  | 48,333                   |
| 26 | Mobility Limitation/                                                                                               | 5,302                    |
| 27 | Elder*.ti,ab.                                                                                                      | 309,362                  |
| 28 | Physical* Disable*.ab,ti.                                                                                          | 946                      |
| 29 | Disable*.ab,ti.                                                                                                    | 29,513                   |
| 30 | Disabilit*.ab,ti.                                                                                                  | 248,032                  |
| 31 | Walking difficult*.ab,ti.                                                                                          | 676                      |
| 32 | Handicap*.ab,ti.                                                                                                   | 25,939                   |
| 33 | physical* impair*.ab,ti.                                                                                           | 3,179                    |
| 34 | physical* Challeng*.ab,ti.                                                                                         | 693                      |
| 35 | Ambulat* Difficult*.ab,ti.                                                                                         | 88                       |
| 36 | Mobility difficult*.ab,ti.                                                                                         | 248                      |

|    |                                                                                                                 |            |
|----|-----------------------------------------------------------------------------------------------------------------|------------|
| 37 | Mobility impair*.ab,ti.                                                                                         | 1,375      |
| 38 | Mobility limit*.ab,ti.                                                                                          | 1,475      |
| 39 | Amput*.ab,ti.                                                                                                   | 53,720     |
| 40 | Motor difficult*.ab,ti.                                                                                         | 538        |
| 41 | Amputation/                                                                                                     | 24,036     |
| 42 | Geriatrics/                                                                                                     | 31,564     |
| 43 | (theor* or framework* or model* or taxonom* or classifi* or concept*).ab,ti.                                    | 5,792,006  |
| 44 | (Matching Person and Technology).ab,ti.                                                                         | 22         |
| 45 | (("abandonment" or "discontinuance") and "model").ab,ti.                                                        | 652        |
| 46 | 43 or 44 or 45                                                                                                  | 5,792,010  |
| 47 | 1 or 2 or 3 or 4                                                                                                | 176,120    |
| 48 | 25 or 26 or 27 or 28 or 29 or 30 or 31 or 32 or 33 or 34 or 35 or 36 or 37 or 38 or 39 or 40 or 41 or 42        | 693,119    |
| 49 | 44 or 45                                                                                                        | 672        |
| 50 | 5 or 6 or 7 or 8 or 9 or 10 or 11 or 12 or 13 or 14 or 15 or 16 or 17 or 18 or 19 or 20 or 21 or 22 or 23 or 24 | 177,267    |
| 51 | 46 and 47 and 48 and 50                                                                                         | 125        |
| 52 | limit 51 to english language                                                                                    | 119        |
| 53 | limit 52 to dt=20000101-20230615                                                                                | <b>113</b> |
| 54 | 23 or 24                                                                                                        | 131        |
| 55 | 43 and 47 and 48 and 54                                                                                         | 7          |
| 56 | limit 55 to english language                                                                                    | 7          |
| 57 | limit 56 to dt=20000101-20230615                                                                                | 6          |
| 58 | 44 or 45                                                                                                        | 672        |
| 59 | 47 and 48 and 50 and 58                                                                                         | 1          |
| 60 | limit 59 to english language                                                                                    | 1          |
| 61 | limit 60 to dt=20000101-20230615                                                                                | 1          |

Database(s): **Ovid Embase** Search Strategy:

| #  | Query                                                                                                              | Results from 25 Jan 2024 |
|----|--------------------------------------------------------------------------------------------------------------------|--------------------------|
| 1  | (Access* adj10 (barrier* or challeng* or restrict* or obstacle* or impediment* or difficult* or issue*)).ab,ti.    | 87,961                   |
| 2  | (Provision* adj10 (barrier* or challeng* or restrict* or obstacle* or impediment* or difficult* or issue*)).ab,ti. | 10,436                   |
| 3  | (Provide* adj10 (barrier* or challeng* or restrict* or obstacle* or impediment* or difficult* or issue*)).ab,ti.   | 130,869                  |
| 4  | (Adoption* adj10 (barrier* or challeng* or restrict* or obstacle* or impediment* or difficult* or issue*)).ab,ti.  | 8,868                    |
| 5  | Wheelchairs/                                                                                                       | 11,328                   |
| 6  | Orthotic Devices/                                                                                                  | 7,401                    |
| 7  | Exoskeleton Device/                                                                                                | 1,439                    |
| 8  | Mobility device*.ab,ti.                                                                                            | 651                      |
| 9  | Mobility technolog*.ab,ti.                                                                                         | 60                       |
| 10 | Wheelchair*.ab,ti.                                                                                                 | 13,334                   |
| 11 | Scooter*.ab,ti.                                                                                                    | 1,019                    |
| 12 | Walker*.ab,ti.                                                                                                     | 17,951                   |
| 13 | Prosthetic*.ab,ti.                                                                                                 | 76,782                   |
| 14 | prosthesis/                                                                                                        | 34,110                   |
| 15 | orthotic*.ab,ti.                                                                                                   | 5,397                    |
| 16 | Self-Help Devices/                                                                                                 | 2,991                    |
| 17 | Exoskeleton*.ab,ti.                                                                                                | 5,220                    |
| 18 | Orthos*.ab,ti.                                                                                                     | 36,392                   |
| 19 | power mobility.ab,ti.                                                                                              | 164                      |
| 20 | Prosthe* device*.ab,ti.                                                                                            | 2,827                    |
| 21 | (Assistive technolog* adj10 mobility).ab,ti.                                                                       | 167                      |
| 22 | (Assistive device* adj10 mobility).ab,ti.                                                                          | 304                      |
| 23 | assistive product*.ab,ti.                                                                                          | 116                      |
| 24 | mobility product*.ab,ti.                                                                                           | 24                       |
| 25 | Disabled Persons/                                                                                                  | 31,702                   |
| 26 | Mobility Limitation/                                                                                               | 14,782                   |
| 27 | Elder*.ti,ab.                                                                                                      | 438,514                  |
| 28 | Physical* Disable*.ab,ti.                                                                                          | 1,216                    |
| 29 | Disable*.ab,ti.                                                                                                    | 38,359                   |
| 30 | Disabilit*.ab,ti.                                                                                                  | 351,478                  |
| 31 | Walking difficult*.ab,ti.                                                                                          | 1,256                    |
| 32 | Handicap*.ab,ti.                                                                                                   | 31,675                   |
| 33 | physical* impair*.ab,ti.                                                                                           | 4,519                    |
| 34 | physical* Challeng*.ab,ti.                                                                                         | 964                      |
| 35 | Ambulat* Difficult*.ab,ti.                                                                                         | 133                      |
| 36 | Mobility difficult*.ab,ti.                                                                                         | 341                      |
| 37 | Mobility impair*.ab,ti.                                                                                            | 1,840                    |
| 38 | Mobility limit*.ab,ti.                                                                                             | 1,960                    |
| 39 | Amput*.ab,ti.                                                                                                      | 67,426                   |
| 40 | Motor difficult*.ab,ti.                                                                                            | 753                      |

|    |                                                                                                           |            |
|----|-----------------------------------------------------------------------------------------------------------|------------|
| 41 | Amputation/                                                                                               | 26,615     |
| 42 | Geriatrics/                                                                                               | 34,445     |
| 43 | (theor* or framework* or model* or taxonom* or classifi* or concept*).ab,ti.                              | 7,145,078  |
| 44 | (Matching Person and Technology).ab,ti.                                                                   | 32         |
| 45 | (("abandonment" or "discontinuance") and "model").ab,ti.                                                  | 807        |
| 46 | 43 or 44 or 45                                                                                            | 7,145,085  |
| 47 | 5 or 6 or 7 or 8 or 9 or 10 or 11 or 12 or 13 or 15 or 16 or 17 or 18 or 19 or 20 or 21 or 22 or 23 or 24 | 160,676    |
| 48 | 25 or 26 or 27 or 28 or 29 or 30 or 31 or 32 or 33 or 34 or 35 or 36 or 37 or 38 or 39 or 40 or 41 or 42  | 945,466    |
| 49 | 1 or 2 or 3 or 4                                                                                          | 227,351    |
| 50 | 47 and 48 and 49                                                                                          | 511        |
| 51 | 46 and 50                                                                                                 | 138        |
| 52 | limit 51 to english language                                                                              | 135        |
| 53 | limit 52 to dc=20000101-20230615                                                                          | <b>128</b> |
| 54 | 44 or 45                                                                                                  | 837        |
| 55 | 47 and 48 and 49 and 54                                                                                   | 0          |
| 56 | 23 or 24                                                                                                  | 140        |
| 57 | 43 and 48 and 49 and 56                                                                                   | 13         |
| 58 | limit 57 to english language                                                                              | 13         |
| 59 | limit 58 to dc=20000101-20230615                                                                          | 13         |

## Database(s): EBSCO CINAHL Search Strategy:

| #   | Query                                                                                                                                                          | Results<br>January 25,<br>2024 |
|-----|----------------------------------------------------------------------------------------------------------------------------------------------------------------|--------------------------------|
| S54 | S46 AND S47 AND S48 AND S53                                                                                                                                    | 0                              |
| S53 | S44 OR S45                                                                                                                                                     | 228                            |
| S52 | S46 AND S48 AND S51 AND S43<br>Limiters - Publication Date: 20000101-20230631; Language: English                                                               | 3                              |
| S51 | S23 OR S24                                                                                                                                                     | 83                             |
| S50 | S49 AND EM 20000101-20230620                                                                                                                                   | 79                             |
| S49 | S46 AND S47 AND S48 AND S43<br><br>Limiters - Language: English                                                                                                | 83                             |
| S48 | S25 OR S26 OR S27 OR S28 OR S29 OR S30 OR S31 OR S32 OR S33 OR S34<br>OR S35 OR S36 OR S37 OR S38 OR S39 OR S40 OR S41 OR S42                                  | 301,747                        |
| S47 | S5 OR S6 OR S7 OR S8 OR S9 OR S10 OR S11 OR S12 OR S13 OR S14 OR S15<br>OR S16 OR S17 OR S18 OR S19 OR S20 OR S21 OR S22 OR S23 OR S24                         | 43,351                         |
| S46 | S1 OR S2 OR S3 OR S4                                                                                                                                           | 76,486                         |
| S45 | TI (("abandonment" or "discontinuance") and "model") OR AB<br>(("abandonment" or "discontinuance") and "model")                                                | 208                            |
| S44 | TI "Matching Person and Technology" OR AB "Matching Person and<br>Technology"                                                                                  | 22                             |
| S43 | TI ( theor* OR framework* OR model* OR taxonom* OR classifi* OR<br>concept* ) OR AB ( theor* OR framework* OR model* OR taxonom* OR<br>classifi* OR concept* ) | 1,078,845                      |
| S42 | (MH "Geriatrics")                                                                                                                                              | 6,037                          |
| S41 | (MH "Amputation")                                                                                                                                              | 7,602                          |
| S40 | TI "Motor difficult*" OR AB "Motor difficult*"                                                                                                                 | 243                            |
| S39 | TI Amput* OR AB Amput*                                                                                                                                         | 15,295                         |
| S38 | TI "Mobility limit*" OR AB "Mobility limit*"                                                                                                                   | 972                            |
| S37 | TI "Mobility impair*" OR AB "Mobility impair*"                                                                                                                 | 820                            |
| S36 | TI "Mobility difficult*" OR AB "Mobility difficult*"                                                                                                           | 170                            |
| S35 | TI "Ambulat* Difficult*" OR AB "Ambulat* Difficult*"                                                                                                           | 28                             |
| S34 | TI "physical* Challeng*" OR AB "physical* Challeng*"                                                                                                           | 422                            |
| S33 | TI "physical* impair*" OR AB "physical* impair*"                                                                                                               | 1,749                          |
| S32 | TI Handicap* OR AB Handicap*                                                                                                                                   | 6,519                          |
| S31 | TI "Walking difficult*" OR AB "Walking difficult*"                                                                                                             | 242                            |
| S30 | TI Disabilit* OR AB Disabilit*                                                                                                                                 | 133,132                        |
| S29 | TI Disable* OR AB Disable*                                                                                                                                     | 13,792                         |
| S28 | TI "Physical* Disable*" OR AB "Physical* Disable*"                                                                                                             | 466                            |
| S27 | TI Elder* OR AB Elder*                                                                                                                                         | 116,611                        |
| S26 | (MH "Physical Mobility")                                                                                                                                       | 7,634                          |
| S25 | (MH "Persons with Disabilities")                                                                                                                               | 37,272                         |
| S24 | TI "mobility product*" OR AB "mobility product*"                                                                                                               | 13                             |
| S23 | TI "assistive product*" OR AB "assistive product*"                                                                                                             | 70                             |
| S22 | TI ("Assistive device*" n10 mobility) OR AB ("Assistive device*" n10<br>mobility)                                                                              | 151                            |

|     |                                                                                                                                                                                                                                      |        |
|-----|--------------------------------------------------------------------------------------------------------------------------------------------------------------------------------------------------------------------------------------|--------|
| S21 | TI ("Assistive technolog*" n10 mobility) OR AB ("Assistive technolog*" n10 mobility)                                                                                                                                                 | 136    |
| S20 | TI "Prosthet* device*" OR AB "Prosthet* device*"                                                                                                                                                                                     | 428    |
| S19 | TI "power mobility" OR AB "power mobility"                                                                                                                                                                                           | 147    |
| S18 | TI Orthose* OR AB Orthose*                                                                                                                                                                                                           | 2,518  |
| S17 | TI Exoskeleton* OR AB Exoskeleton*                                                                                                                                                                                                   | 837    |
| S16 | (MH "Assistive Technology Devices")                                                                                                                                                                                                  | 6,676  |
| S15 | TI orthotic* OR AB orthotic*                                                                                                                                                                                                         | 2,904  |
| S14 | (MH "Limb Prosthesis")                                                                                                                                                                                                               | 2,974  |
| S13 | TI Prosthetic* OR AB Prosthetic*                                                                                                                                                                                                     | 13,058 |
| S12 | TI Walker* OR AB Walker*                                                                                                                                                                                                             | 4,154  |
| S11 | TI Scooter* OR AB Scooter*                                                                                                                                                                                                           | 477    |
| S10 | TI Wheelchair* OR AB Wheelchair*                                                                                                                                                                                                     | 6,563  |
| S9  | TI "Mobility technolog*" OR AB "Mobility technolog*"                                                                                                                                                                                 | 49     |
| S8  | TI ( "Mobility device*") OR AB ( "Mobility device*")                                                                                                                                                                                 | 471    |
| S7  | (MH "Exoskeleton Devices")                                                                                                                                                                                                           | 320    |
| S6  | (MH "Orthoses")                                                                                                                                                                                                                      | 7,168  |
| S5  | (MH "Wheelchairs")                                                                                                                                                                                                                   | 5,113  |
| S4  | TI ( (Adoption* n10 (barrier* or challeng* or restrict* or obstacle* or impediment* or difficult* or issue*)) ) OR AB ( (Adoption* n10 (barrier* or challeng* or restrict* or obstacle* or impediment* or difficult* or issue*)) )   | 3,417  |
| S3  | TI ( Provide* n10 (barrier* or challeng* or restrict* or obstacle* or impediment* or difficult* or issue*)) ) OR AB ( Provide* n10 (barrier* or challeng* or restrict* or obstacle* or impediment* or difficult* or issue*)) )       | 42,436 |
| S2  | TI ( (Provision* n10 (barrier* or challeng* or restrict* or obstacle* or impediment* or difficult* or issue*)) ) OR AB ( (Provision* n10 (barrier* or challeng* or restrict* or obstacle* or impediment* or difficult* or issue*)) ) | 5,384  |
| S1  | TI ( (Access* n10 (barrier* or challeng* or restrict* or obstacle* or impediment* or difficult* or issue*)) ) OR AB ( (Access* n10 (barrier* or challeng* or restrict* or obstacle* or impediment* or difficult* or issue*)) )       | 30,413 |

Database(s): **Scopus** Search Strategy:

```

( ( ( TITLE-ABS ( access* W/10 ( barrier* OR challeng* OR restrict* OR obstacle* OR impediment* OR difficult*
OR issue* ) ) ) ) OR ( ( TITLE-ABS ( provision* W/10 ( barrier* OR challeng* OR restrict* OR obstacle* OR
impediment* OR difficult* OR issue* ) ) ) ) OR ( ( TITLE-ABS ( provide* W/10 ( barrier* OR challeng* OR restrict*
OR obstacle* OR impediment* OR difficult* OR issue* ) ) ) ) OR ( ( TITLE-ABS ( adoption* W/10 ( barrier* OR
challeng* OR restrict* OR obstacle* OR impediment* OR difficult* OR issue* ) ) ) ) ) AND ( TITLE-ABS ( "Disabled
Person*" OR "Mobility* Limitation*" OR elder* OR "Physically Disabled" OR disable* OR disabilit* OR "Walking
difficult*" OR handicap* OR "physically impair*" OR "Physically Challeng*" OR "Ambulat* difficult*" OR
"Mobility difficult*" OR "Mobility impair*" OR "Mobility limit*" OR "Amput*" OR "Motor difficult*" OR
amputation* ) ) AND ( TITLE-ABS ( theor* OR framework* OR model* OR taxonom* OR classifi* OR concept* OR
"Matching Person and Technology" OR ( abandonment OR discontinuance AND model ) ) ) AND ( TITLE-ABS (
wheelchair* OR "power mobility*" OR "Mobility device*" OR "Mobility technolog*" OR ( "Assistive technolog*"
W/10 mobility ) OR ( "Assistive device*" W/10 mobility ) OR orthotic* OR exoskeleton* OR scooter* OR walker*
OR prosthet* OR orthos* OR prosthetic* OR "Prosthe* device*" OR orthotic* OR "mobility product*" OR
"assistive product*" ) ) AND PUBYEAR > 1999 AND PUBYEAR < 2024 AND ( LIMIT-TO ( LANGUAGE,"English" ) )

```

168 documents

Theories, models and frameworks to understand barriers to the provision of mobility assistive technologies: A scoping review

Appendix 3, Table. Characteristics of included papers

| Authors and Year                           | Study design                            | Aims of the study                                                                                                          | Population (n, characteristics)                      | Country                                 |
|--------------------------------------------|-----------------------------------------|----------------------------------------------------------------------------------------------------------------------------|------------------------------------------------------|-----------------------------------------|
| McIntyre, Cleland and Ramklass (2021) [48] | Qualitative, Semi-structured interviews | To explore facilitators and barriers to accessible wheelchair services                                                     | 11(8 occupational therapists and 3 physiotherapists) | South Africa                            |
| Dorjbal et al. (2020) [47]                 | Qualitative, Semi-structured interviews | To identify environmental barriers and their influence on daily life                                                       | 16(SCI patients)                                     | Mongolia                                |
| Jindal et al. (2018) [45]                  | Qualitative, Semi-structured interviews | To investigate parents' perceptions of rehabilitation and their information needs for their child with cerebral palsy (CP) | 18 (parents of children with CP)                     | India and Canada                        |
| Bhidayasiri et al. (2022) [49]             | Review article                          | To present clinical viewpoints on the unfulfilled needs of wearable technology, such as exoskeletons and orthoses          | N/A                                                  | N/A                                     |
| Layton (2012) [37]                         | Mixed method                            | To identify barriers and facilitators to optimal mobility from the perspective of AT users                                 | 100 (AT users. Neurological conditions)              | Australia, Survey, Open-ended responses |
| Mairami et al. (2017) [43]                 | Qualitative, case study, Semi-          | 1. To illustrate how AT influences stroke recovery and how the                                                             | 1(Stroke patient)                                    | Malaysia                                |



Theories, models and frameworks to understand barriers to the provision of mobility assistive technologies: A scoping review

|                                               |                                         |                                                                                                                              |                                                       |             |
|-----------------------------------------------|-----------------------------------------|------------------------------------------------------------------------------------------------------------------------------|-------------------------------------------------------|-------------|
|                                               | structured interview                    | environment might be altered to facilitate recovery<br>2. To examine the issues of AT affordability and accessibility        |                                                       |             |
| Dwyer and Mulligan (2015) [39]                | Literature review                       | To determine the obstacles and enablers for community reintegration as experienced by individuals with SCI                   | A total of 373 participants in the 7 included studies | New Zealand |
| Seymour, Geiger and Scheffler (2019) [46]     | Qualitative, Focus group                | To identify the issues associated with wheelchair provision and the elements that contribute to or mitigate these challenges | 21 (Community rehabilitation workers)                 | Uganda      |
| Gonçalves Junior, Knabben and Luz (2017) [42] | Qualitative, Semi-structured interviews | To demonstrate how people with lower limb amputation function and express their limitations                                  | 6 (patients with amputation)                          | Brazil      |
| Arthanat, Elsaesser and Bauer (2017) [41]     | Quantitative, Survey                    | To explore how AT providers perceive their education and training, the use of evidence and guidelines, financing policies.   | 318 (AT providers)                                    | US          |
| Gowran et al. (2021) [22]                     | Position Paper                          | To examine the global challenges related to wheelchair accessibility                                                         | N/A                                                   | N/A         |
| Steel and Layton (2016) [40]                  | Feature Article                         | An exploration of the complexities of AT provision in Australia                                                              | N/A                                                   | Australia   |
| Widehammar et al. (2020) [44]                 | Qualitative, Semi-structured interviews | An exploration of how users' experiences of power mobility products                                                          | 14(AT users)                                          | Sweden      |

Theories, models and frameworks to understand barriers to the provision of mobility assistive technologies: A scoping review

|                                      |                                                |                                                                                                                                              |                                                      |                |
|--------------------------------------|------------------------------------------------|----------------------------------------------------------------------------------------------------------------------------------------------|------------------------------------------------------|----------------|
|                                      |                                                | are influenced by environmental factors                                                                                                      |                                                      |                |
| Hammel et al. (2013) [38]            | Qualitative, multiple case study, Focus groups | Multiple stakeholders' perspectives, issues, and priorities related to accessing, using, and evaluating MATs                                 | 65(45 AT users, 10 caregivers, 10 service providers) | USA and Canada |
| Serres-Lafontaine et al. (2023) [50] | Qualitative, photovoice method                 | To study how peer training affects social involvement                                                                                        | 10 Wheelchair users (SCI patients)                   | Tanzania       |
| Oskar et al. (2011) [21]             | A postal questionnaire                         | To explore and assess the experiences of active wheelchair prescribers under the regulations and provisions set by local Swedish governments | 278 prescribers                                      | Sweden         |
| Smith et al. (2016) [51]             | Review article                                 | To investigate the determinants influencing participation among wheelchair users                                                             | 35 studies were included                             | N/A            |

Theories, models and frameworks to understand barriers to the provision of mobility assistive technologies: A scoping review

**Appendix 4 Table. Propositions identified in the theories, models and frameworks**

| Name of the theory,<br>model or framework                                 | Propositions                                                                                                                                                                                                                                                                                                                                                                                                                                                                                                                                                                                                                                                                                                                                                                                                                        |
|---------------------------------------------------------------------------|-------------------------------------------------------------------------------------------------------------------------------------------------------------------------------------------------------------------------------------------------------------------------------------------------------------------------------------------------------------------------------------------------------------------------------------------------------------------------------------------------------------------------------------------------------------------------------------------------------------------------------------------------------------------------------------------------------------------------------------------------------------------------------------------------------------------------------------|
| International Classification of Functioning, Disability, and Health (ICF) | <ol style="list-style-type: none"> <li>1. A health condition can affect both the mental and physical body functions.</li> <li>2. An individual's activities are impacted by their health condition.</li> <li>3. Health conditions affect an individual's engagement in activities, determining their level of participation.</li> <li>4. External factors, for example, social factors, can either inhibit or facilitate an individual's level of functioning.</li> <li>5. Society may create barriers, for example, inaccessible services or lack of facilitators, such as the unavailability of AT, which can affect an individual's performance.</li> <li>6. An individual's functioning is affected by the presence or absence of services, for example, equipment, products, and technologies in their environment.</li> </ol> |

Theories, models and frameworks to understand barriers to the provision of mobility assistive technologies: A scoping review

---

7. External elements like systems and policies that regulate and facilitate the provision of services can impact a person's functional capacity.
  8. An individual's level of functioning can also be influenced by external factors such as support and relationships, including family, people in positions of authority, and health professionals.
  9. Personal factors of an individual represent their internal aspects, including psychological factors, that can affect their level of functioning.
  10. Individuals' functioning and disabilities are influenced by their health status as well as contextual factors, such as environmental and personal factors.
  11. Functioning is defined as encompassing body functions, body structures, activities, and participation.
-

Theories, models and frameworks to understand barriers to the provision of mobility assistive technologies: A scoping review

---

12. An impairment, an activity limitation, or a restriction on participation constitutes a disability.

---

Levesque's conceptual framework

1. The concept of approachability is related to the ability of individuals with health needs to recognise the existence of available services, access them, and receive effective healthcare that can improve their health.
  2. Cultural and social factors determine the acceptability of health services within their context.
  3. The reachability of health services depends on their physical presence and timeliness.
  4. Factors like personal mobility, transportation availability, adaptability in occupation, and knowledge of accessible health services are interconnected and contribute to an individual's capacity to access healthcare providers physically.
-

Theories, models and frameworks to understand barriers to the provision of mobility assistive technologies: A scoping review

---

5. The concept of affordability in healthcare refers to the ability of people to pay for services without causing undue financial hardship or affecting their ability to afford basic necessities.
  6. The ability to afford healthcare services is connected to a person's financial resources, including income, savings, and borrowing capacity.
  7. Appropriateness in healthcare refers to the fit between the services provided and the needs and preferences of clients, as well as the quality and safety of those services.
  8. Engaging in healthcare involves the active participation of clients in decision-making and treatment planning, which helps to ensure that care is aligned with their goals and values.
  9. Accessibility of health services is affected by the availability of information.
-

Theories, models and frameworks to understand barriers to the provision of mobility assistive technologies: A scoping review

---

10. Personal autonomy and the ability to choose care-seeking are linked to the ability to access health care.

---

The Human Activity Assistive Technology model (HAAT)

1. AT enhances an individual's capabilities to complete desired tasks.
  2. Human activities are essential, learnable, and influenced by societal and cultural contexts.
  3. The use of desired technology is influenced by human skills and abilities (physical, cognitive, emotional).
  4. An individual's ability to perform activities is affected by their skills and abilities (physical, cognitive, emotional).
  5. The use of AT to perform an activity is influenced by various factors in the environment, including physical, social, cultural, and institutional elements.
-

Theories, models and frameworks to understand barriers to the provision of mobility assistive technologies: A scoping review

---

6. Choosing and implementing the right AT requires considering the interaction between different elements, including the activity being performed, the user's needs and abilities, and the broader environmental context in which the technology will be used.
7. The process of performing an activity leads to a functional result of human performance.

---

Gibson's affordances theory

1. Cognition: Affordances exist as a cognitive process which comes through people and organisations interacting with material entities.
  2. Perception: Affordances need to be perceived or recognised by the person or organisation.
  3. Behaviour: the affordance is actualised as the behaviour that people/organisations adopt acting on the perceived opportunity for action.
-



Theories, models and frameworks to understand barriers to the provision of mobility assistive technologies: A scoping review

1  
2  
3  
4  
5  
6  
7  
8  
9  
10  
11  
12  
13  
14  
15  
16  
17  
18  
19  
20  
21  
22  
23  
24  
25  
26  
27  
28  
29  
30  
31  
32  
33  
34  
35  
36  
37  
38  
39  
40  
41  
42  
43  
44  
45  
46  
47  
48  
49  
50  
51  
52  
53  
54  
55  
56  
57  
58  
59  
60

---

4. Evaluation: Evaluating the effects of this behaviour.

5. Environmental factors and structures can impact disabilities.

---

Systemic development model (SDM)

1. Understanding personal, organisational, and institutional capacity requires consideration of factors such as health, culture, economics, and politics.
  2. It is crucial to provide appropriate services to improve the health, well-being, and fundamental freedoms of individuals in need.
  3. Limited access to services can create a cycle of poverty and disability.
  4. Service delivery systems that are tailored to specific contexts play a significant role in ensuring appropriate service provision.
  5. Economic factors impact the availability of products and services
-

Theories, models and frameworks to understand barriers to the provision of mobility assistive technologies: A scoping review

---

and can affect the viability of service provision.

6. Evaluation of the quality, development, performance, and procurement standards of products is crucial for improving service delivery systems and individual health outcomes.
7. Political governance also plays a role in ensuring access to appropriate services.

---

Multi Intervention Paradigm for Assessment and Application of Concurrent Treatments (IMPACT<sup>2</sup>)

1. The results of interventions can be outlined by examining the six phases, including: 1) Pre-Intervention, 2) Context, 3) Baseline, 4) Intervention Strategies, 5) Outcome Covariates, and 6) Outcomes.
  2. Personal and contextual factors influence the products and services used by individuals to perform activities.
-

Theories, models and frameworks to understand barriers to the provision of mobility assistive technologies: A scoping review

---

3. Universal design and health promotion are two methods that can be utilised to enhance functional performance.
  4. The context in which AT is used to perform a task within an environment is crucial for improving participation and QoL.
  5. Intervention approaches, such as reducing the impairment, compensating for the impairment, using AT, and redesigning the activity, are used to support the use of AT and optimise an individual's functioning.
  6. Consumer satisfaction is a desirable outcome of AT provision.
  7. Outcome(function) is defined as participation, QoL, and engagement.
  8. Cost influences the Intervention approaches therefore affecting Outcomes.
-

Theories, models and frameworks to understand barriers to the provision of mobility assistive technologies: A scoping review

---

Matching Person and Technology (MPT )

1. AT serves as a bridge between individual capabilities and the demands of tasks within their environment.
  2. Personal autonomy and the performance of everyday activities are enhanced by integrating technology that matches individual needs.
  3. The compatibility of assistive products with the user's lifestyle is crucial for successful adoption and satisfaction.
  4. The user's physical, cognitive, and emotional dimensions must be considered to optimise the functionality of AT.
  5. AT should empower individuals, promoting independence and self-efficacy in their desired roles and activities.
  6. The design and functionality of assistive technology must reflect the
-

Theories, models and frameworks to understand barriers to the provision of mobility assistive technologies: A scoping review

---

1  
2  
3  
4  
5 user's self-image and socio-cultural  
6  
7 identity to foster acceptance.

8  
9  
10 7. AT should assist and elevate the user's  
11  
12 ability to engage in social roles and  
13  
14 activities with confidence and ease.

15  
16 8. The choice of AT is personal,  
17  
18 influenced by individual preferences,  
19  
20 aspirations, and the context of their  
21  
22 lives.

23  
24  
25 9. Effective AT integrates into the user's  
26  
27 environment, enhancing their  
28  
29 capabilities without introducing new  
30  
31 barriers.

32  
33  
34 10. The success of an assistive product is  
35  
36 measured not only by its technical  
37  
38 features but also by its ability to align  
39  
40 with the user's psychosocial context  
41  
42 and enhance their QoL.  
43  
44  
45  
46  
47  
48  
49  
50  
51  
52  
53  
54  
55  
56  
57  
58  
59  
60

---

Theories, models and frameworks to understand barriers to the provision of mobility assistive technologies: A scoping review

Appendix 5, Table. Gaps analysis

| Gaps                                            | Recommendations for future research                                                                                                                                                                                                                                                                                                                                                                                                 |
|-------------------------------------------------|-------------------------------------------------------------------------------------------------------------------------------------------------------------------------------------------------------------------------------------------------------------------------------------------------------------------------------------------------------------------------------------------------------------------------------------|
| Remote Regions and Accessibility                | Key areas for future investigation included examining access to AT in remote regions [37, 48, 45] by investigating challenges and barriers faced in remote regions [48], and concentrating on modifiable elements like wheelchair skills and ease of access [51]                                                                                                                                                                    |
| Stakeholder Perspectives                        | The included papers in this review draw attention to several issues, such as investigating policymakers' and HCPs' views on rehabilitation services [45]. Understanding the challenges faced by people with disabilities [50]. This includes understanding stakeholder perspectives on the various aspects of access by identifying the enablers and barriers that might aid in planning to increase access to AT services [46,48]. |
| Funding, Policy, and Legislation                | Future research should investigate funding and policy-related barriers [ 21, 39, 41, 47], the impact of legislation on accessibility and participation for powered mobility product users [44], fostering low-cost approaches in low- and middle-income countries [43], and promoting inclusive solutions for wheelchair service provision [22,50].                                                                                 |
| Data Collection and methodological improvements | Adoption of standardised instruments to assess functioning and disability is needed                                                                                                                                                                                                                                                                                                                                                 |

Theories, models and frameworks to understand barriers to the provision of mobility assistive technologies: A scoping review

|                                                 |                                                                                                                                                                                                                                                                                                                                                                        |
|-------------------------------------------------|------------------------------------------------------------------------------------------------------------------------------------------------------------------------------------------------------------------------------------------------------------------------------------------------------------------------------------------------------------------------|
|                                                 | [42,44]. Comparing perceptions users with and without AT [42,44]. Exploration of user satisfaction, choice, and control in relation to MATs and its impact on overall outcomes [38]. Development of standards for testing AT effectiveness [49].                                                                                                                       |
| Contextual Understanding and service evaluation | Importance of investigating in-country perspectives consideration of personal, social, economic, environmental, historical, and political factors [22]. Incorporating subjective measures in service evaluations [40]. Assessing the effects of new products on work environments and identifying the annually prescribed types of AT are essential undertakings [21]. |

# BMJ Open

## Theories, models and frameworks to understand barriers to the provision of mobility assistive technologies: A scoping review

|                                 |                                                                                                                                                                                                                                                                                                                                                                                                                                                                 |
|---------------------------------|-----------------------------------------------------------------------------------------------------------------------------------------------------------------------------------------------------------------------------------------------------------------------------------------------------------------------------------------------------------------------------------------------------------------------------------------------------------------|
| Journal:                        | <i>BMJ Open</i>                                                                                                                                                                                                                                                                                                                                                                                                                                                 |
| Manuscript ID                   | bmjopen-2023-080633.R2                                                                                                                                                                                                                                                                                                                                                                                                                                          |
| Article Type:                   | Original research                                                                                                                                                                                                                                                                                                                                                                                                                                               |
| Date Submitted by the Author:   | 02-Apr-2024                                                                                                                                                                                                                                                                                                                                                                                                                                                     |
| Complete List of Authors:       | Aldawood, Asma; The University of Sheffield, School of Medicine and Population Health; King Saud bin Abdulaziz University for Health Sciences, College of Applied Medical Sciences<br>Hind, Daniel; The University of Sheffield, School of Medicine and Population Health<br>Rushton, Simon; University of Sheffield, Department of Politics and International Relations<br>Field, Becky; The University of Sheffield, School of Medicine and Population Health |
| <b>Primary Subject Heading</b>: | Health services research                                                                                                                                                                                                                                                                                                                                                                                                                                        |
| Secondary Subject Heading:      | Health services research                                                                                                                                                                                                                                                                                                                                                                                                                                        |
| Keywords:                       | Health Services Accessibility, Self-Help Devices, Disabled Persons, Review                                                                                                                                                                                                                                                                                                                                                                                      |
|                                 |                                                                                                                                                                                                                                                                                                                                                                                                                                                                 |

SCHOLARONE™  
Manuscripts





I, the Submitting Author has the right to grant and does grant on behalf of all authors of the Work (as defined in the below author licence), an exclusive licence and/or a non-exclusive licence for contributions from authors who are: i) UK Crown employees; ii) where BMJ has agreed a CC-BY licence shall apply, and/or iii) in accordance with the terms applicable for US Federal Government officers or employees acting as part of their official duties; on a worldwide, perpetual, irrevocable, royalty-free basis to BMJ Publishing Group Ltd ("BMJ") its licensees and where the relevant Journal is co-owned by BMJ to the co-owners of the Journal, to publish the Work in this journal and any other BMJ products and to exploit all rights, as set out in our [licence](#).

The Submitting Author accepts and understands that any supply made under these terms is made by BMJ to the Submitting Author unless you are acting as an employee on behalf of your employer or a postgraduate student of an affiliated institution which is paying any applicable article publishing charge ("APC") for Open Access articles. Where the Submitting Author wishes to make the Work available on an Open Access basis (and intends to pay the relevant APC), the terms of reuse of such Open Access shall be governed by a Creative Commons licence – details of these licences and which [Creative Commons](#) licence will apply to this Work are set out in our licence referred to above.

Other than as permitted in any relevant BMJ Author's Self Archiving Policies, I confirm this Work has not been accepted for publication elsewhere, is not being considered for publication elsewhere and does not duplicate material already published. I confirm all authors consent to publication of this Work and authorise the granting of this licence.

1  
2  
3 **Theories, models and frameworks to understand barriers to the provision**  
4 **of mobility assistive technologies: A scoping review**  
5  
6  
7

8 Asma Aldawood<sup>1,2\*</sup>, Daniel Hind<sup>1</sup>, Simon Rushton<sup>3</sup>, Becky Field<sup>1</sup>  
9

10  
11 *1. School of Medicine and Population Health, The University of Sheffield, Sheffield, UK*  
12

13  
14 *2. King Saud bin Abdulaziz University for Health Sciences, Riyadh, Saudi Arabia*  
15

16  
17 *3. Department of Politics and International Relations, The University of Sheffield, Sheffield, UK.*  
18  
19  
20  
21  
22

23  
24 \*Corresponding author  
25

26 Email: [aaldawood2@sheffield.ac.uk](mailto:aaldawood2@sheffield.ac.uk) (AA)  
27  
28  
29  
30  
31  
32  
33  
34  
35  
36  
37  
38  
39  
40  
41  
42  
43  
44  
45  
46  
47  
48  
49  
50  
51  
52  
53  
54  
55  
56  
57  
58  
59  
60

## Abstract

**Objectives** There is strong evidence that mobility-assistive technologies improve occupational performance, social participation, educational and employment access, and overall quality of life in people with disabilities. However, people with disabilities still face barriers in accessing mobility products and related services. This review aims to summarise and synthesise: 1) theories, models, and frameworks that have been used to understand mobility-assistive technology access, 2) determinants of access, and 3) gaps in knowledge.

**Design** A Scoping review using the five-step Arksey and O'Malley Framework.

**Data sources** We searched the MEDLINE, EMBASE, CINAHL, and SCOPUS databases for publications published between 2000 and 2024. We searched for articles published up to 20 March 2024.

**Eligibility criteria** We included English-published literature in peer-reviewed journals that reported (a) barriers to the provision of mobility-assistive technologies, (b) including at least one theory, model, or framework, and (c) between 2000 and 2024.

**Data extraction and synthesis** We extracted the study characteristics, theories, models, framework usage, research recommendations, key findings on mobility-assistive technology barriers, and theoretical propositions. We conduct a theoretical synthesis guided by Turner's approach.

**Results** We included 18 articles that used eight theories, models, and frameworks, synthesised into nine propositions. The synthesised theory emphasises that mobility is essential for human flourishing, and that certain health conditions may impose restrictions on mobility. This impact can be alleviated by two direct determinants: (1) the provision of suitable services and (2) their comprehensive provision. Policies and costs influence these services indirectly. Environmental and personal factors also affect the use of these services. Ineffectively addressing these determinants can limit access to mobility-assistive technologies and subsequent disabilities.

**Conclusion** Our synthetic model describes the logic of providing evidence-based mobility-assistive technologies, and we identify the determinants of access which can act as targets for future work to improve mobility-assistive technologies provision.

## Strengths and limitations of this study

- We used a comprehensive search strategy developed with an information specialist to identify relevant publications.
- We mapped reported barriers to a widely used conceptual framework - the Consolidated Framework for Implementation Research - for consistent terminology.
- We conducted a theoretical synthesis to generate new insights.
- We excluded non-English studies, potentially limiting the applicability of our findings.
- We exclude grey literature, which further narrows the scope of the review.

For peer review only

## INTRODUCTION

Neurological conditions, musculoskeletal disorders, and ageing are associated with considerable human burdens, including decreased quality of life (QoL) [1,2], activity limitations [3], participation restrictions [4,5], increased dependence, and caregiver burden [6]. Mobility-assistive technologies (MATs) are vital for addressing the challenges posed by these conditions, as they can help improve QoL, promote independence, enhance occupational performance, increase participation, and alleviate the burden on individuals, families, and societies [7]. MATs encompass assistive products for mobility and related systems and services [7]. These assistive products include devices, software, or instruments specifically designed or widely available to enhance the functioning of an individual [8]. They support or substitute the ability to move, thereby facilitating movement from one location to another [8]. Examples include wheelchairs, walking frames, rollators, and prosthetic and orthotic products [8].

Wheeled mobility products, prosthetics, and orthotics are cost-effective for improving the QoL and independence of people with disabilities [9,10]. Despite being endorsed by the United Nations [11] and World Health Organization (WHO) [7], which are essential for creating equitable opportunities for people with disabilities, access to these MATs remains limited [7,12]. There is a considerable unmet need for MATs worldwide, with only a small percentage of those who require them having access [7,12]. Access to assistive technology (AT) is defined as the equitable and sustainable provision of assistive products and support services that adhere to six key principles: accessibility, affordability, availability, adaptability, acceptability, and quality [7]. These principles ensure that assistive products and services are reachable, cost-effective, adaptable to individual needs, culturally appropriate, widely available, and of high quality [7].

The reasons for the unmet need for MATs are poorly understood but include the absence of national policies, high costs, and insufficiently trained personnel [7]. Several pre-existing theories, models, and frameworks (TMFs) have been used to understand the determinants of access and uptake, each with different conceptual coverage and terminology, which could help plan corrective actions. A framework is a structure for organising concepts that enable the description of phenomena [13,14]. For instance, Levesque's conceptual framework defines five dimensions of healthcare accessibility: approachability, acceptability, availability, affordability, and appropriateness [15]. This framework builds upon Penchansky and Thomas' foundational work, which originally identified the key dimensions of access to healthcare services as availability, accessibility, accommodation, affordability, and acceptability. These dimensions define access by assessing how well healthcare systems are prepared to meet patients' needs [16]. The International Classification of Functioning, Disability, and Health framework (ICF) is a framework developed by the WHO that classifies the health and disability components of functioning and contextual factors [17]. These include multi-aspect concepts related to body functions, structures, activities, participation, and environmental factors [17].

A model is a simplified representation of reality that holds for a specific case or population [13,18,19]; models may describe the relationship between their components but tend to be descriptive rather than explanatory [13]. For example, the Human Activity Assistive Technology (HAAT) model describes the interaction between human activity, AT, and the physical, social, and cultural contexts in which it is used [20]. The integrated multi-intervention paradigm for the assessment and application of concurrent treatments (IMPACT<sup>2</sup>) model describes the variables related to AT interventions [21]. The Matching Person and Technology (MPT) is a model that describes the interaction between environmental, personal, and technological factors in the success of AT uptake [22]. The Systemic Development Model (SDM), developed by the World Engagement Institute (WEI), describes four

interconnected pillars of sustainability—health, culture, economics, and politics—to enhance the understanding of capacities at the personal, organisational, and institutional levels [23].

A theory is an interconnected set of abstract statements that explain, predict, or prescribe phenomena, going beyond specific contexts to consider broader meanings and implications [13,14,18,24]. For instance, Gibson's theory proposes that the environment contains actionable (and therefore explanatory) properties, "affordances", that are directly perceived [25]. When a research area is characterised by theoretical incoherence, researchers must choose between rigid empiricism, selecting theories based on their virtues, developing their own theory, and theoretical synthesis [26]. Theoretical synthesis can amalgamate propositions from different theories into a propositional network, enabling researchers to extend the coverage, content validity, and document points of convergence [26]. Scoping reviews are ideal for uncovering key concepts and informing future research designs [27]. This paper presents a scoping review that summarises and synthesises the TMFs used to understand MAT access, identifies the determinants of access, and highlights the gaps in current knowledge.

## METHOD

We report a five-stage scoping review based on the approach outlined by Arksey and O'Malley [28], in line with the Preferred Reporting Items for Systematic Reviews and Meta-Analyses extension for Scoping Reviews (PRISMA-ScR) (online supplemental appendix 1) [29]. This study did not meet the eligibility requirements for registration using PROSPERO. The research questions were as follows: What theories, models, and frameworks have been used to understand the barriers to the provision of MATs for people with mobility issues? What are the determinants of access to MATs for people with mobility issues? What are the current knowledge gaps in access to MATs for people with mobility issues?

### Eligibility criteria

The Behaviour of Interest, Health Context, Exclusion, Models, or Theories (BeHEMoTH) framework [30] was employed to formulate the search concepts (Table 1) and eligibility criteria (Table 2).

**Table 1 Application of the BeHEMoTH framework to define search concepts**

| BeHEMoTH                           | Concept                              |
|------------------------------------|--------------------------------------|
| <b>Be – Behaviour of interest:</b> | Barriers to access or provision      |
| <b>H – Health context</b>          | People with mobility issues AND MATs |
| <b>E – Exclusions</b>              | NA                                   |
| <b>MoTh – Models or Theories</b>   | Models or Theories or Frameworks     |

**Table 2 Inclusion and exclusion criteria**

| Inclusion criteria | Exclusion criteria | Rationale |
|--------------------|--------------------|-----------|
|--------------------|--------------------|-----------|

|                                                                 |                                                                                                       |                                                                                                   |
|-----------------------------------------------------------------|-------------------------------------------------------------------------------------------------------|---------------------------------------------------------------------------------------------------|
| Publications reporting on the barriers to the provision of MATs | Publication concentrates on aspects other than barriers to access, and there is no report on barriers | This review focuses on understanding barriers to the provision of MATs                            |
| Publications including at least a theory, model, or framework   | Publications that did not employ a theory, model, or framework                                        | To ensure that the articles concentrate on theory, model, or framework to understand the barriers |
| Publications in peer-reviewed journals                          | Other publications such as conference abstracts and theses                                            | To ensure that studies had undergone rigorous evaluation                                          |
| Publications published in the English language                  | Publications in other languages                                                                       | Costs and time commitment associated with article translation                                     |
| Publications between 2000 and 2024                              | Publication published before 2000                                                                     | To ensure using the most relevant publications from the previous 24 years                         |

## Information sources and Searches

Literature searches were performed by (AA) on MEDLINE (Ovid), EMBASE (Ovid), CINAHL (EBSCO), and SCOPUS databases for studies published between 1 January 2000 and 20 March 2024. To identify the appropriate publications relevant to the research issue, a *priori* search strategy was established in collaboration with the authors (AA and DH) and an information specialist (FZ). The search terms combined the concepts of ‘barriers to provision, mobility issues, AND ‘MATs’, and a theory/model/framework’. Free text terms, subject heading, use of the Boolean operators "AND" and "OR", and truncation were all used to ensure a successful search. The final search strategy was tested on MEDLINE via Ovid, and then translated into other databases. The full search strategy and results are presented in online supplemental appendix 2. We reviewed the reference lists of the included articles to identify additional relevant articles [28] but restricted the eligibility to peer-reviewed studies, excluding grey literature.

## Study selection

The Rayyan platform (<https://www.rayyan.ai>) was used for study selection. Initial title and abstract screening were conducted by (AA), where the primary aim was to assess studies for potential relevance based on predefined inclusion and exclusion criteria. Given the subjective nature of this assessment, any uncertainties regarding study eligibility encountered by AA were systematically discussed with the other reviewers (DH, SR, and BF). Full-text screening involved consistent discussions among (AA, DH, SR, and BF), and the full texts of eligible articles were subsequently retrieved for a more detailed assessment.



## Data charting process

To facilitate consistent data presentation and synthesis, we charted general and study-specific information from the studies in Microsoft Excel spreadsheets. Data items included country of origin, study population, aims, sample size, study design, data collection tool, TMF used, a brief description of its purpose, research recommendations, and key findings related to barriers to the provision of MATs. We extracted theoretical propositions from the TMFs, as discussed in the articles included in our review. In instances in which these articles did not provide a comprehensive explanation of TMFs, such as Gibson's affordances theory, the IMPACT<sup>2</sup> model, and the HAAT model, we referred to the foundational sources. The sources cited within the included articles are original materials in which TMFs were first introduced or explained thoroughly. This ensured that our understanding and coverage of TMFs was comprehensive, especially when the application of these TMFs in the reviewed articles lacked depth. Although these foundational sources were not directly included in our review as they did not meet our inclusion criteria, they were consulted for additional insights. We mapped the reported barriers to one of the updated constructs of the Consolidated Framework for Implementation Research (CFIR), a synthetic framework of constructs used in 19 implementation theories [31,32], using a codebook (<https://cfirguide.org/>). The CFIR provides a set of standardised constructs to guide researchers, creating a common language for explicitly and consistently describing aspects that may affect the provision [33].

## Synthesis of results

Tabular summaries and narrative syntheses were completed for the included articles and their TMFs [34]. We conducted a theoretical synthesis to generate new insights that were unavailable for any TMF [35]. The synthesis was guided by Turner's [36] approach. In Step 1, the TMFs are summarised, and their shared themes are identified. In Step 2, the aspects of the TMF that pertain to core concepts by extracting the phrases used, their definitions, and their explicit and implicit relationships are identified. In Step 3, the TMFs are broken into simple propositions that can be compared and tabulated. In Step 4, the theories are compared and determined how they converge or diverge by combining similar elements. In Step 5, the convergent elements from the TMF are combined into a single conceptual model that focuses on the relationships between concepts. For example, during this stage, we examined how concepts from these TMFs—such as cost, services, and activity (mobility)—interacted and influenced each other within the synthesised theory to gain theoretical insight. We incorporated statements from the studies included in this review to strengthen the synthesis and support the resulting conceptual model (Step 6).

## Gaps analysis

To identify knowledge gaps and areas for future research, we reviewed papers and tabulated explicit recommendations, which is a core function of scoping reviews [27].

## Patients and public involvement

No patients or public were involved in the study.



## RESULTS

### Characteristics of the studies

The literature search yielded 306 citations after the removal of duplicates. A total of 246 citations were excluded after initial screening, and 60 potentially eligible articles were retrieved for full-text review. Of these, 45 were excluded because barriers were not reported ( $n=10$ ), TMFs were not reported ( $n=27$ ), and the citations were conference abstracts ( $n=7$ ) or theses ( $n=1$ ). Fifteen studies identified from the databases met all the eligibility criteria. After reviewing the reference lists and conducting manual searches, 25 additional studies were identified and examined for eligibility, and three studies were determined to be eligible (Figure 1) [37].

#### Figure 1 PRISMA flow diagram.

The final synthesis included 18 articles (online supplemental appendix 3) [16,22,23,38–52]. Eight studies addressed the challenges associated with the provision and use of MATs [16,22,23,38,39,42,44,47,49,50]. Four studies examined environmental barriers to participation [40,45,48,51,52]. Two studies explored the experiences of patients and caregivers and their rehabilitation needs [43,46]. One study drew attention to inconsistencies in AT provision schemes [41]. There were ( $n=5$ ) secondary studies and ( $n=13$ ) primary research studies conducted between 2012 and 2023 in South Africa [49], Mongolia [48], Canada, India [46], Australia [38,41], Malaysia [44], New Zealand [40], Uganda [47], Brazil [43], United States [42], Iran [16], Sweden [22,45], Tanzania [51], Canada, and the United States [39]. The primary studies contained between one and 318 participants.

Eight TMFs, representing various perspectives, were identified. Two were biopsychosocial in orientation: the ICF [17] and HAAT [20], which focused on AT. Two other models that focus on AT are IMPACT<sup>2</sup> [21] and MPT [22]. Four other identified TMFs were applied to AT access: Penchansky and Thomas's framework [16], Levesque's theoretical framework [15], Gibson's affordances theory [25], and the SDM [53]. The most frequently used TMF was ICF ( $n=12$ ). All included studies applied one TMF, except for one [41], which used two in combination: ICF and IMPACT<sup>2</sup>. There are three distinct applications of TMFs, as shown in Supplemental Figure 1. The majority were used as a basis for analysis and interpretation ( $n=13$ ) or as a guide for designing the surveys and interviews ( $n=2$ ). In addition, TMFs were used as a comprehensive framework to provide a context for reviewing the relevant literature ( $n=3$ ).

### Barriers to MATs provision synthesised using CFIR

The key barriers in the innovation domain are cost concerns [16,23,38–42,44,46,48,49], intervention complexity [23,39,45,47], inadequate evidence of effectiveness [41,42], product-related factors such as comfort, durability, and fit [52]; and limited models and colour choices available [22] (Figure 2). The outer-setting domain highlights societal attitudes toward AT [22,47,48,50,52], geographic distance [16,41,43,49], a lack of supportive legislation [16,23,39,45,47,48,50,51], and environmental barriers [22,52]. Within the inner-setting domain, resource constraints [23,42,43,47,49], restricted knowledge, and information access hinder provision [23,38,39,42,47,50]. The characteristics of the individuals' domains revealed knowledge about the intervention [23,47,48,50] and low self-efficacy among healthcare professionals [16,42,49] as barriers to its adoption. In addition, within the

1  
2  
3 characteristics of individual domains, barriers include limited information access [16,38–40,43,45,49],  
4 such as a lack of access to training and instructions on the use and management of mobility products  
5 [16]. Furthermore, there is a lack of awareness among users [49,50], and insufficient inclusion of user  
6 preferences in prescriptions [22]. In the process domain, barriers include insufficient stakeholder  
7 engagement [39,42,50], absence of interdisciplinary standards [42], and limited strategic planning  
8 [39].  
9

10  
11 **Figure 2 Barriers to the provision of MATs synthesised using the CFIR.**  
12  
13

## 14 **Theories, Models and Frameworks (TMF) Synthesis**

15  
16  
17 The propositions derived from the theories, models, and frameworks are described in Supplemental  
18 Appendix 4, and the resulting synthetic model is presented in Figure 3.  
19

20  
21 **Figure 3 Synthetic model.**  
22

### 23 **Proposition 1: mobility is essential for human flourishing**

24  
25  
26 The ICF framework highlights activity as a key component of health, with disabilities resulting from  
27 restricted activities, such as mobility issues [17]. This affects participation in everyday activities, such  
28 as work, socialisation, and healthcare access [17]. The HAAT model explains a similar concept,  
29 describing the 'activity' as the action of performing a task that represents the functional outcome of  
30 human performance [20]. Building on these insights, 'mobility' is viewed as an individual's ability to  
31 perform tasks that enable meaningful participation. The HAAT model and IMPACT<sup>2</sup> emphasise the  
32 importance of participation in everyday activities, such as working and socialising, for overall health  
33 [20,21], describing it as "necessary to human existence" [20]. According to the HAAT model, humans  
34 are defined based on their intrinsic physical, cognitive, and emotional abilities [20]. Accordingly,  
35 mobility is viewed more as a necessary means of meaningful participation than an end to the  
36 development of physical, cognitive, and psychosocial skills throughout life [38,46]  
37  
38  
39  
40

### 41 **Proposition 2: health conditions and personal factors influence mobility**

42  
43  
44 An individual's mobility is influenced by health and personal factors, which, in turn, affect their  
45 participation in social, work, and leisure activities. For example, the ICF framework clearly describes  
46 how health issues and personal factors can affect activities and participation [17] and describes health  
47 conditions as umbrella terms for diseases, disorders, injuries, or trauma [17]. Similarly, the HAAT  
48 model highlights the impact of a person's physical and cognitive abilities and personal elements, such  
49 as emotional and psychological factors, on their ability to perform activities [46]. Accordingly,  
50 'personal factors' that encompass elements, such as psychological attributes, age, and coping style  
51 influence an individual's ability to perform activities [17]. For example, Dwyer and Mulligan [40]  
52 highlighted how emotional changes caused by spinal cord injury (SCI) could impede participation in  
53 rehabilitation services and other areas of reintegration, such as employment and leisure activities.  
54  
55  
56

### 57 **Proposition 3: appropriate services influence mobility**

58  
59  
60

1  
2  
3 The ICF and HAAT models explicitly describe the relationships between the activities and their  
4 environments. Both emphasise the importance of activities for participating in and developing in life,  
5 and some interventions can improve a person's ability to engage in the desired activities [17,20]. For  
6 instance, in the ICF framework, AT services are considered to be an environmental factor, which is  
7 appropriate for helping individuals achieve their intended activities and participate in various  
8 situations [17]. Similarly, the MPT model was developed considering the ICF framework and  
9 focusing on the relationship between individuals and AT [54]. This suggests that AT is an essential  
10 means of bridging the gap between an individual's capabilities and the demands of tasks in their  
11 environment, thereby significantly enhancing their engagement in the desired activities [22].  
12 Levesque's framework, building upon the foundational work of Penchansky and Thomas, identifies  
13 that 'the appropriateness of a service' is determined by its alignment with the needs of the client,  
14 whereas the HAAT and MPT models emphasise that with AT, an individual's capabilities are  
15 increased [15,16,20,22]. Consequently, to meet individual needs and maximise capabilities, we define  
16 the appropriateness of services based on the extent to which they are tailored. This demonstrates that  
17 MATs are vital for people with disabilities and for older people who require them, thus enhancing  
18 their independence and participation in daily life [38,46].  
19  
20  
21  
22  
23

#### 24 Proposition 4: service delivery must be comprehensive to influence human 25 mobility 26

27  
28 Institutional factors significantly influence individual activities, as explained by the HAAT model  
29 [20] and ICF frameworks [17]. Levesque's framework emphasises the importance of how services are  
30 provided to meet client needs [15], whereas Penchansky and Thomas highlight the necessity of  
31 adequate resources, including staff, to ensure that these needs are effectively met [16]. Similarly, the  
32 IMPACT<sup>2</sup> model is concerned with providing services and ensuring that outcomes are met, including  
33 QOL, participation, and satisfaction with the services provided [21]. The MPT model demonstrates  
34 that user satisfaction with service provision can be achieved by considering key features of products  
35 such as usability, quality, weight, stability, and safety [22]. Accordingly, the concept of  
36 'comprehensive services' refers to providing clients with high-quality products and the necessary  
37 support services to meet their needs and achieve satisfaction. Providing comprehensive services  
38 encompassing assessment, training, and maintenance is crucial for enhancing personal mobility  
39 [23,39]. Effective delivery of AT services requires well-trained personnel [23]. These are critical  
40 components of service delivery systems that help individuals enhance their mobility.  
41  
42  
43  
44  
45

#### 46 Proposition 5: environmental factors influence individuals' decision to seek 47 appropriate health care services 48

49  
50 Assistive products for mobility and participation are influenced by environmental factors such as  
51 social, cultural, and physical environments, which affect individuals' health and well-being. The ICF  
52 framework views disability as a health experience arising from context and not solely within an  
53 individual [17]. It emphasises how society can create barriers such as inaccessible services or  
54 neglected facilitators, such as the lack of AT [17]. Furthermore, an individual's level of functioning is  
55 determined by their relationships with family, people, and healthcare providers, all of which can  
56 influence their decision to seek healthcare [17]. A similar concept of how society affects activities is  
57 highlighted by the HAAT model, which places particular emphasis on an individual's cultural context  
58 [20]. The MPT model also emphasises the role of sociocultural factors, acknowledging how a user's  
59  
60

1  
2  
3 social setting and cultural attitudes towards disability can influence their perception of and adoption  
4 of mobility products. This includes consideration of product-related social implications and stigmas  
5 [22]. For example, parents of children with disabilities oppose wheelchairs because of social stigma  
6 [46], and some older people perceive mobility products negatively because of stigmatising symbolism  
7 [50]. This demonstrates the significant influence of sociocultural factors, such as support and  
8 relationships from family, health professionals, and community on MAT accessibility and acceptance.  
9 Furthermore, the MPT model emphasises the importance of the physical environment, which includes  
10 both the built environment within the user's home and the external surroundings, in affecting use and  
11 acceptance [22]. For example, if a wheelchair does not fit the physical and psychosocial environment  
12 in which it is used, it is more likely to limit function rather than enhance it [22]. Therefore, the  
13 success of MAT is not measured solely by its technical features but also by its ability to fit into the  
14 user's psychosocial context [22].  
15  
16  
17  
18

### 19 Proposition 6: policies influence the provision of services 20

21  
22 The SDM framework highlights how organisational service delivery policies influence appropriate  
23 service provision [53], whereas the ICF explains how policies affect participation and activities [17].  
24 As part of the ICF, the term 'policy' is commonly used within the environmental factor domain as an  
25 external factor that can impact an individual's health and function [17]. This set of guidelines, rules,  
26 and regulations governs the range of services provided to individuals, including policies and standards  
27 that define the eligibility criteria for services [45]. For instance, prostheses are not considered to be  
28 life-saving medical devices or crucial components of the healthcare system [43]. However, they are  
29 life-changing for users and can quickly restore most functions [43]. Levesque's framework argues that  
30 the availability of health services should ensure those in need can access either the physical facilities  
31 or healthcare personnel [15]. However, barriers to access emerge when healthcare is unavailable in  
32 certain geographic areas or when individuals' insurance does not cover the necessary treatments  
33 [15,16]. Penchansky and Thomas further emphasised the need for a well-organised supply of  
34 resources, including the integration of telephone or remote service consultations [16]. The lack of  
35 such accommodations can prevent individuals from obtaining the required healthcare, potentially  
36 leading to adverse health outcomes. Disparities between government and institutional policies can  
37 result in confusion among AT providers and decrease service utilisation [23,47].  
38  
39  
40  
41  
42

### 43 Proposition 7: cost influences the provision of appropriate services 44

45  
46 The SDM framework [53] highlights the significant influence of economic factors on service delivery  
47 and reinforces the idea that costs can significantly influence access to healthcare services. The term  
48 'cost' refers to the expenses incurred by individuals and healthcare systems to provide services  
49 [15,21]. This comprises the direct prices of services such as consultation fees, product costs, and  
50 related expenses [15]. For instance, the IMPACT<sup>2</sup> model underlines the role of cost implications in  
51 selecting intervention approaches and demonstrating the cost effects at each stage of AT provision  
52 [21]. Both Penchansky and Thomas [16] and Levesque et al. [15] emphasised the critical role of an  
53 individual's financial capacity, including income and willingness to pay, in accessing healthcare.  
54 Therefore, costs can significantly influence access to AT.  
55  
56  
57

### 58 Proposition 8: personal factors influence healthcare utilisation 59 60

1  
2  
3 Healthcare utilisation is influenced by various 'personal factors' that represent an individual's internal  
4 aspects, such as psychological characteristics [17]. This concept is explained using Levesque's  
5 framework. It highlights factors such as an individual's need for care, awareness of these needs, and  
6 desire for treatment [15]. Gibson's affordance theory suggests that an individual's perception of their  
7 environment is based on its potential to fulfil their needs, thereby shaping their decisions [25].  
8 Therefore, the individual is responsible for unravelling the utility presented by affordance. For  
9 instance, the client in Mairami et al. [44] adapted a chair from a home to a wheelchair. This  
10 demonstrates how the client's perception of their environment shaped their recovery when an existing  
11 structure was found to have assistive potential. The ICF model explains the significance of  
12 environmental factors, such as the visibility of services, in determining an individual's level of  
13 functioning [17], which is related to Gibson's affordance theory, in which environmental cues trigger  
14 actions [25]. Consequently, the lack of service limits the activities that can be conducted. Personal  
15 factors not classified within the ICF are acknowledged to have a significant impact on healthcare  
16 access [17]. The MPT model highlights that the choice of assistive products is deeply personal and  
17 shaped by individual aspirations, anticipated satisfaction of needs, and perceived personal value of  
18 these products [22]. These elements play a crucial role in influencing the uptake of MATs, as they are  
19 associated with the context of users' lives [22].  
20  
21  
22  
23  
24  
25  
26

### 27 **Proposition 9: limited access to healthcare services creates disability**

28  
29 The ICF acknowledges the influence of environmental factors on disability development and  
30 emphasises the limitations it imposes on individuals' abilities to access healthcare services and engage  
31 in social activities [17]. As defined by the ICF, disabilities include impairments, limitations in activity  
32 levels, and restrictions on participation [17]. Consequently, restricted AT accessibility impairs body  
33 function, hinders participation, and contributes to disabilities. The SDM framework explains the  
34 significance of economic factors, particularly the "lack of economic means", which limit access to  
35 services such as MAT [53]. Restricted access can trigger continuous cycles of disabilities and poverty  
36 [23]. Persistent mobility constraints, whether due to inadequate MAT service support or diminished  
37 participation in daily life, have been identified as significant factors leading to disability [47,48].  
38  
39  
40  
41

### 42 **Gaps analysis**

43  
44 This review highlights key research areas in AT services that warrant further investigation (online  
45 supplemental appendix 5). Investigations should focus on AT access in remote regions [38,46,49],  
46 examine gender disparities in service accessibility [16], explore stakeholder perspectives on  
47 rehabilitation services and barriers to AT access [47,49,51], and address challenges related to funding,  
48 policy, and legislation [22,23,40,42,44,48,51]. Data collection and methodological enhancements are  
49 required, including standardised instruments for assessing functioning and disability [43,45],  
50 comparisons of user experiences with and without AT [39,41], and comprehensive evaluation tools  
51 combining objective and subjective measures [39,41]. Emphasis should also be placed on  
52 understanding the in-country perspectives, inclusive solutions, and the impact of contextual factors on  
53 AT access [23]. This involves evaluating how new products impact workplace settings and  
54 determining which types of AT are essential [22]. Future studies should examine product  
55 compatibility, enhance user skills, and improve accessibility to the built environment [52]. Addressing  
56 these research gaps could contribute to the development of more effective, inclusive, and accessible  
57 AT services for individuals with disabilities.  
58  
59  
60



## DISCUSSION

This scoping review offers a summary of the barriers to MAT provision and synthesis theories to guide future work based on 18 articles. The synthesised theory emphasises that mobility is essential for human flourishing (Proposition 1) and that certain health conditions may impose restrictions on mobility (Proposition 2). This impact can be ameliorated by two direct determinants: the provision of suitable services (Proposition 3) and their comprehensive provision (Proposition 4). Policies (Proposition 6) and costs (Proposition 7) indirectly influence these services. Furthermore, an individual's decision to access these services is determined by their environment (Proposition 5) and personal factors (Proposition 8). If these direct and indirect determinants are not effectively addressed, it could result in limited access to MATs and subsequent disability (Proposition 9). This synthesised theory integrates empirical and ethical dimensions and provides evidence-based approaches to solving problems [18].

To the best of our knowledge, this is the first report on the synthesis of TMFs and the barriers to MAT provision. Although De Alves and Matsukura's [55] literature review outlined the various theoretical models used in the AT literature, they did not attempt theoretical synthesis. TMFs organise concepts and thoughts to provide insights into different elements of practice and research [13]. Lakatos proposes that scientific enquiry should appraise a series of theories rather than a single theory, noting that "the members of such series of theories are usually connected by a remarkable continuity which welds them into research programmes" [56]. Lakatos advocated for a 'pluralistic model' of scientific theories, in which several theories, which are organised deductively to varying degrees, are brought together in a unified approach [56]. Unlike Lakatos, we view this study as an enhancement of problem-solving effectiveness [57]. By combining propositions from different theories, we increased the coverage of the resulting syntheses of individual theories. It should predict the range of barriers encountered in MAT access and provision.

The theory covers a socially significant issue given that it addresses the current research priorities identified by expert panels organised by government agencies and clinical speciality organisations [7,58–60]. It addresses the phenomenon of interest to rehabilitation scholars by filling the gaps in the existing TMFs. Although the MPT model does not explicitly discuss barriers to AT access, it provides valuable insights into the interactions between the personal, technological, and environmental factors that influence successful AT adoption [22]. The MPT model, developed based on the ICF framework [54], highlights the importance of aligning assistive products with user needs, preferences, and contexts to optimise functionality and satisfaction. Future research should further explore how the MPT model can inform strategies to address barriers to access and provision of MAT.

An adequate specification was achieved by providing a clear and concise overview of the theoretical synthesis. In addition, we establish linkage adequacy by defining the concepts and their relationships [61]. The theory is testable because it contains observable concepts and propositions that can be operationalised and corroborated in empirical research. A limitation of the scoping review was the exclusion of non-English language studies, which could limit the applicability of the findings; research from other languages could have offered additional valuable insights [62]. Another limitation is that the review's focus on studies from 2000 to 2024 potentially omitted earlier relevant research on barriers and TMF. However, a broader historical scope may have reduced the relevance of the findings to contemporary decision-making in the provision of AT. The exclusion of grey literature, including government reports and policy documents, further narrowed the scope of the review. This exclusion may have resulted in the omission of relevant non-peer-reviewed TMFs. In addition, the processes of data extraction, coding using CFIR, and synthesis inherently involve subjectivity. Search

1  
2  
3 terms such as 'service delivery,' 'service\*', 'deliver\*,' and additional or alternative terms for older  
4 people, such as 'older person\*' or 'older adult\*,' may have identified additional studies.

5 Our review highlights several key knowledge gaps regarding MAT access and provision.  
6 These include the need for research on AT access in remote regions, stakeholder perspectives on  
7 barriers and enablers, funding and policy challenges, and the impact of contextual factors  
8 [23,38,40,42,44,46,47,49,51]. Methodological improvements such as the adoption of standardised  
9 instruments and the incorporation of user satisfaction measures are also needed to advance the field  
10 [39,41,43,45]. Importantly, the widely used ICF framework does not include personal factors that play  
11 a crucial role in MAT access [17]. Future research should address these gaps to provide a more  
12 comprehensive understanding of the determinants of access to MAT. Figures 2 and Supplemental  
13 Figure 1 provide overviews of the identified barriers and the TMFs used in the included studies,  
14 respectively. Although no single model can fully capture the complexity of MAT access, researchers  
15 and practitioners should consider the strengths and limitations of each TMF and select the most  
16 appropriate one(s) based on specific research questions and contexts.

17 The insights from this review and the resulting integrated model have the potential to  
18 influence clinical practice and policymaking in line with the ethical imperatives outlined by the WHO  
19 and the UN [7,11]. These organisations have emphasised the necessity of AT to meet individual needs  
20 and enable equitable opportunities for people with disabilities. The synthesised theory aligns with the  
21 principles of access to AT as advocated by the WHO and UNICEF, highlighting the necessity for  
22 assistive products and services to be reachable, affordable, adaptable to individual needs and  
23 environments, culturally appropriate, and of high quality. By addressing the direct and indirect  
24 determinants of access, as identified in the theory, including service provision, policies, costs,  
25 physical, social, cultural factors, and personal preferences, we can align better with these global  
26 principles [7]. Therefore, this review proposes a theoretical basis for reforming the existing system to  
27 align it with international standards, thus addressing the pressing and unmet needs more equitably and  
28 personally. To achieve this, future research must examine these determinants, understand the barriers  
29 to MAT provision, and plan and evaluate strategies to enhance its provision. Having a set of  
30 determinants organised around the CFIR [32] allows the creation of local implementation strategies to  
31 suit different policy jurisdictions.

32 There is a consensus [63,64] and evidence-based approach [65] to overcome the barriers to  
33 effective AT provision found in this review. The barriers identified by the CFIR can be linked to  
34 Expert Recommendations for Implementing Change (ERIC) strategies [66]. These strategies guide the  
35 selection of implementation methods to mitigate barriers and include (1) activating local clinical  
36 leaders or champions, (2) providing educational materials, (3) organising meetings, and (4)  
37 implementing outreach or ongoing training. The implementation of these strategies can assist  
38 decision-makers in making informed choices regarding the selection of strategies for MAT provision.

## 39 40 41 42 43 44 45 46 47 48 **CONCLUSION**

49 The synthesised theory emphasises that mobility is a crucial aspect of human life and certain health  
50 conditions may restrict mobility. Providing comprehensive and appropriate services can reduce this  
51 impact; however, cost and policy decisions regarding these services affect their provision.  
52 Accessibility to these services is also affected by environmental and personal factors. This knowledge  
53 can be used to develop strategies to enhance provision.

## 54 55 56 57 58 **ACKNOWLEDGEMENTS**

1  
2  
3 The authors thank Louise Falzon of the School of Medicine and Population Health at the University  
4 of Sheffield. She provided invaluable assistance in refining our search strategy. We would also like to  
5 thank the University of Sheffield Institutional Open Access Fund for its funding towards the research.  
6 This work was previously presented at the 17th International Conference of the Association for the  
7 Advancement of Assistive Technology in Europe (AAATE 2023) held in Paris between 30 August  
8 and 1 September 2023.  
9  
10

## 11 **CONTRIBUTORS**

12  
13  
14  
15 All authors contributed to the conceptualisation and design of the study. Initial title and abstract  
16 screening were conducted by AA, with regular consultations with DH, SR, and BF. AA performed the  
17 data extraction independently, with regular discussions with DH, SR, and BF. The initial data  
18 synthesis was conducted by AA and refined by DH, SR, and BF. The manuscript was drafted by AA,  
19 and major revisions were made by DH, SR, and BF. All the authors (AA, DH, SR, and BF) have read  
20 and approved the final manuscript.  
21  
22  
23

## 24 **FUNDING**

25  
26  
27 This study received no specific grants from any funding agency in the public, commercial, or not-for-  
28 profit sectors.  
29

## 30 **COMPETING INTERESTS**

31  
32  
33 The authors report there are no competing interests to declare.  
34

## 35 **DATA AVAILABILITY STATEMENT**

36  
37  
38 The authors confirm that the data supporting the findings of this study are available in the  
39 article and supplementary materials.  
40  
41  
42  
43

## 44 **RIGHTS RETENTION STATEMENT**

45  
46  
47 For the purpose of open access, the author has applied for a Creative Commons Attribution (CC BY)  
48 licence to any author-accepted manuscript version.  
49  
50  
51

## 52 **SUPPORTING MATERIALS**

53  
54  
55 Supplemental Appendix 1, Checklist. Preferred Reporting Items for Systematic reviews and Meta-  
56 Analyses extension for Scoping Reviews (PRISMA-ScR)  
57 Supplemental Appendix 2, Table. Systematic search conducted in MEDLINE, EMBASE, CINAHL,  
58 and SCOPUS  
59  
60



1  
2  
3 Supplemental Appendix 3, Table. Characteristics of included papers  
4 Supplemental Appendix 4, Table. Propositions derived from the theories, models, and frameworks  
5 Supplemental Appendix 5, Table. Gaps analysis  
6 Supplemental Figure 1. Theories, models, frameworks, and their purpose of application in eligible  
7 studies  
8  
9  
10  
11  
12  
13

## 14 ORCID iDs

15 Asma Aldawood, <https://orcid.org/0000-0003-4670-4348>

16 Daniel Hind, <https://orcid.org/0000-0002-6409-4793>

17 Simon Rushton, <https://orcid.org/0000-0003-1055-9871>

18 Becky Field, <https://orcid.org/0000-0003-3502-2691>  
19  
20  
21  
22  
23  
24

## 25 Ethical Approval and Dissemination:

26 Ethical approval was not required for this scoping review. The dissemination plan includes publishing  
27 in peer-reviewed journals and presenting at academic conferences.  
28  
29  
30  
31  
32

## 33 REFERENCES

- 34 1 Shafrin J, Sullivan J, Goldman DP, *et al.* The association between observed mobility and  
35 quality of life in the near elderly. *PLoS One* 2017;**12**:e0182920. PMID: 28827806  
36  
37 2 Bechtold U, Stauder N, Fieder M. Let's Walk It: Mobility and the Perceived Quality of Life in  
38 Older Adults. *Int J Environ Res Public Health* 2021;**18**:11515. PMID: 34770028  
39  
40 3 Musich S, Wang SS, Ruiz J, *et al.* The impact of mobility limitations on health outcomes  
41 among older adults. *Geriatr Nurs.* 2018;**39**:162–9. PMID: 28866316  
42  
43 4 World Health Organization and World Bank. World report on disability. Geneva: *World*  
44 *Health Organization*; 2011. Available from:  
45 <https://www.who.int/publications/i/item/9789241564182>  
46  
47 5 van Hees SGM, van den Borne BHP, Menting J, *et al.* Patterns of social participation among  
48 older adults with disabilities and the relationship with well-being: A latent class analysis. *Arch*  
49 *Gerontol Geriatr* 2020;**86**:103933. PMID: 31542633.  
50  
51 6 Achilike S, Beauchamp JES, Cron SG, *et al.* Caregiver Burden and Associated Factors among  
52 Informal Caregivers of Stroke Survivors. *Journal of Neuroscience Nursing* 2020;**52**:277–83.  
53 PMID: 33156591.  
54  
55 7 World Health Organization. Global report on assistive technology. Geneva: World Health  
56 Organization; 2022. Available from: <https://www.who.int/publications/i/item/9789240049451>  
57  
58  
59  
60

- 1  
2  
3 8 ISO 9999:2022; International Organization for Standardization Assistive Products—  
4 Classification and Terminology. ISO: Geneva, Switzerland, 2022  
5  
6 9 Hagberg L, Hermansson L, Fredriksson C, *et al.* Cost-effectiveness of powered mobility  
7 devices for elderly people with disability. *Disabil Rehabil Assist Technol* 2017;**12**:115–120.  
8 PMID: 25634493.  
9  
10 10 Frossard L, Ferrada L, Quincey T, *et al.* Cost-effectiveness of transtibial bone-anchored  
11 prostheses using osseointegrated fixation: From challenges to preliminary data. *Journal of*  
12 *Prosthetics and Orthotics* 2021;**33**:184–195. doi:10.1097/JPO.0000000000000372.  
13  
14 11 United Nations. United Nations Convention on the Rights of Persons with Disabilities. United  
15 Nations; 2007.  
16  
17 12 Danemayer J, Boggs D, Delgado Ramos V, *et al.* Estimating need and coverage for five  
18 priority assistive products: a systematic review of global population-based research. *BMJ Glob*  
19 *Health* 2022;**7**:e007662. PMID: 35101862.  
20  
21 13 Nilsen P. Making sense of implementation theories, models and frameworks. *Implement Sci.*  
22 2015;**10**:53. PMID: 25895742  
23  
24 14 Press C, Yon D, Heyes C. Building better theories. *Curr Biol.* 2022;**32**:R13–7. PMID:  
25 35015984  
26  
27 15 Levesque J-F, Harris MF, Russell G. Patient-centred access to health care: conceptualising  
28 access at the interface of health systems and populations. *Int J Equity Health* 2013;**12**:18.  
29 PMID: 23496984.  
30  
31 16 Nabizadeh S, Jalali M, Kamali M, *et al.* Barriers and facilitators of receiving prosthetic  
32 services in people with lower limb amputation during Covid-19 pandemic: A qualitative study  
33 in a developing country. *Prosthet Orthot Int.* 2023;1–10.  
34  
35 17 World Health Organization. International classification of functioning, disability and health:  
36 ICF. Geneva: WHO; 2001.  
37  
38 18 Fawcett J. An overview of conceptual models, theories, and research. In: Fawcett J, editor. *The*  
39 *relationship of theory and research*. 3rd ed. Philadelphia (PA): F.A. Davis Company; 1999. p.  
40 1–25.  
41  
42 19 Passey D. Theories, theoretical and conceptual frameworks, models and constructs: Limiting  
43 research outcomes through misconceptions and misunderstandings. *Studies in Technology*  
44 *Enhanced Learning.* 2020;**1**. doi: 10.21428/8C225F6E.56810A1A  
45  
46 20 Cook A, Polgar J. Activity, human, and context: the human doing an activity in context. In:  
47 Cook A, Polgar J, editors. *Assistive technologies: principles and practice*. 4th ed. St. Louis  
48 (MO): Mosby; 2015. p. 40–67.  
49  
50 21 Smith RO. IMPACT2 Model. Rehabilitation Research Design and Disability Center. 2005.  
51 Available from: <https://uwm.edu/r2d2/methods/impact2-model/>.  
52  
53  
54  
55  
56  
57  
58  
59  
60

- 1  
2  
3 22 Oskar K, Dennis P, Björn L, *et al.* Prescribers' experience of active wheelchair provisioning  
4 in Sweden: Analysis of a postal questionnaire. *Technol Disabil.* 2011;23:183–9. doi:  
5 10.3233/TAD-2011-0316  
6  
7  
8 23 Gowran RJ, Bray N, Goldberg M, *et al.* Understanding the global challenges to accessing  
9 appropriate wheelchairs: Position paper. *Int J Environ Res Public Health* 2021;18:3338.  
10 PMID: 33804868.  
11  
12 24 Gregor S. The nature of theory in Information Systems. *MIS Q.* 2006;30:611–42.  
13 doi.org/10.2307/25148742  
14  
15 25 Gibson JJ. *The ecological approach to visual perception: classic edition.* New York and  
16 London: Psychology Press; 2014.  
17  
18 26 Denzin NK. *The Research Act: A Theoretical Introduction to Sociological Methods.* 1st ed.  
19 USA (New York): Transaction publishers; 2009. Chapter 12, Strategies of multiple  
20 triangulation; p. 234-247.  
21  
22 27 Khalil H, Tricco AC. Differentiating between mapping reviews and scoping reviews in the  
23 evidence synthesis ecosystem. *J Clin Epidemiol* 2022;149:175–182. PMID: 35636593.  
24  
25 28 Arksey H, O'Malley L. Scoping studies: towards a methodological framework. *Int J Soc Res*  
26 *Methodol* 2005;8:19–32. doi:10.1080/1364557032000119616.  
27  
28 29 Tricco AC, Lillie E, Zarin W, *et al.* PRISMA Extension for Scoping Reviews (PRISMA-ScR):  
29 Checklist and Explanation. *Ann Intern Med* 2018;169:467–473 PMID: 30178033.  
30  
31 30 Booth A, Carroll C. Systematic searching for theory to inform systematic reviews: is it  
32 feasible? Is it desirable? *Health Info Libr J* 2015;32:220–235. PMID: 26095232  
33  
34 31 Damschroder LJ, Aron DC, Keith RE, *et al.* Fostering implementation of health services  
35 research findings into practice: a consolidated framework for advancing implementation  
36 science. *Implement Sci* 2009;4:50. PMID: 19664226.  
37  
38 32 Damschroder LJ, Reardon CM, Widerquist MAO, *et al.* The updated Consolidated Framework  
39 for Implementation Research based on user feedback. *Implementation Science* 2022 17:1.  
40 2022;17:1–16. PMID: 36309746  
41  
42 33 Keith RE, Crosson JC, O'Malley AS, *et al.* Using the Consolidated Framework for  
43 Implementation Research (CFIR) to produce actionable findings: a rapid-cycle evaluation  
44 approach to improving implementation. *Implement Sci* 2017;12:15. PMID: 28187747.  
45  
46 34 Popay J, Roberts H, Sowden A, Petticrew M, Arai L, Rodgers M, *et al.* Guidance on the  
47 conduct of narrative synthesis in systematic reviews. Prod ESRC Methods Programme  
48 Version. 2006;1: b92. doi:10.13140/2.1.1018.4643.  
49  
50 35 Pound P, Campbell R. Exploring the feasibility of theory synthesis: A worked example in the  
51 field of health related risk-taking. *Soc Sci Med* 2015;124:57–65. doi:10.1016/j.socscimed.  
52 PMID: 25461862.  
53  
54  
55  
56  
57  
58  
59  
60

- 1  
2  
3 36 Turner JH. Developing Cumulative and Practical Knowledge through Metatheorizing.  
4 *Sociological Perspectives* 1991;**34**:249–268. doi:10.2307/1389510.  
5  
6 37 Page MJ, McKenzie JE, Bossuyt PM, *et al*. The PRISMA 2020 statement: an updated  
7 guideline for reporting systematic reviews. *BMJ* 2021;**372**:n71 PMID: 33782057.  
8  
9 38 Layton N. Barriers and Facilitators to Community Mobility for Assistive Technology Users.  
10 *Rehabil Res Pract* 2012;**2012**:1–9. PMID: 23029617.  
11  
12 39 Hammel J, Southall K, Jutai J, *et al*. Evaluating use and outcomes of mobility technology: a  
13 multiple stakeholder analysis. *Disabil Rehabil Assist Technol* 2013;**8**:294–304. PMID:  
14 23137189.  
15  
16 40 Dwyer K, Mulligan H. Community reintegration following spinal cord injury: Insights for  
17 health professionals in community rehabilitation services in New Zealand. *New Zealand*  
18 *Journal of Physiotherapy* 2015;**43**:75–85. doi:10.15619/NZJP/43.3.02.  
19  
20 41 Steel EJ, Layton NA. Assistive Technology in Australia: Integrating theory and evidence into  
21 action. *Aust Occup Ther J* 2016;**63**:381–390. PMID: 27086661.  
22  
23 42 Arthanat S, Elsaesser L-JJ, Bauer S. A survey of assistive technology service providers in the  
24 USA. *Disabil Rehabil Assist Technol* 2017;**12**:789–800. PMID: 28125297.  
25  
26 43 Gonçalves E, Knabben J, Luz C. Portraying the amputation of lower limbs: an approach using  
27 ICF. *Fisioterapia em Movimento* 2017;**30**:97–106. doi:10.1590/1980-5918.030.001.ao10.  
28  
29 44 Mairami FF, Allotey P, Warren N, *et al*. Adaptive invention: independence and mobility  
30 through modifications. *Disabil Rehabil Assist Technol* 2018; **13**:658–664. PMID: 28836873.  
31  
32 45 Widehammar C, Lidström Holmqvist K, Pettersson I, *et al*. Attitudes is the most important  
33 environmental factor for use of powered mobility devices—users’ perspectives. *Scand J Occup*  
34 *Ther* 2020;**27**:298–308. PMID: 30856033.  
35  
36 46 Jindal P, MacDermid J, Rosenbaum P, *et al*. Perspectives on rehabilitation of children with  
37 cerebral palsy: exploring a cross-cultural view of parents from India and Canada using the  
38 international classification of functioning, disability and health. *Disabil Rehabil*  
39 2018;**40**:2745–55. PMID: 28747138.  
40  
41 47 Seymour N, Geiger M, Scheffler E. Community-based rehabilitation workers’ perspectives of  
42 wheelchair provision in Uganda: A qualitative study. *Afr J Disabil* 2019;**8**: 2226-7220. PMID:  
43 31061818.  
44  
45 48 Dorjbal D, Prodinger B, Zanini C, *et al*. Living with spinal cord injury in Mongolia: A  
46 qualitative study on perceived environmental barriers. *J Spinal Cord Med* 2020;**43**:518–31.  
47 PMID: 30633693.  
48  
49 49 McIntyre J, Cleland K, Ramklass S. Access to wheelchairs by persons with mobility  
50 impairment in a remote rural district of KwaZulu-Natal, South Africa: therapists’ perspectives.  
51 *Rural Remote Health* 2021;**21**:5855. PMID: 33478230.  
52  
53  
54  
55  
56  
57  
58  
59  
60

- 1  
2  
3 50 Bhidayasiri R, Maytharakcheep S, Phumphid S, *et al.* Improving functional disability in  
4 patients with tremor: A clinical perspective of the efficacies, considerations, and challenges of  
5 assistive technology. *J Neurol Sci* 2022;**435**:120197.PMID: 35220112.  
6  
7  
8 51 Serres-Lafontaine A de, Labbé D, Batcho CS, *et al.* Social participation of individuals with  
9 spinal injury using wheelchairs in rural Tanzania after peer training and entrepreneurial skills  
10 training. *Afr J Disabil* 2023;**12**. PMID: 36756462  
11  
12 52 Smith EM, Sakakibara BM, Miller WC. A review of factors influencing participation in social  
13 and community activities for wheelchair users. *Disabil Rehabil Assist Technol*. 2016;**11**:361–  
14 74. PMID: 25472004  
15  
16  
17 53 World Engagement Institute. Sustainable Capacity—Systemic Development Model. 2012  
18 Available from: <http://www.weinstitute.org/methods.html>  
19  
20 54 Lenker JA, Paquet VL. A Review of Conceptual Models for Assistive Technology Outcomes  
21 Research and Practice. *Assistive Technology*. 2003;**15**:1–15.  
22  
23 55 de Jesus Alves AC, Matsukura TS. Theoretic models for recommendation and  
24 implementation of assistive technology 1. *Cadernos de Terapia Ocupacional da UFSCar*  
25 2016;**24**:591. doi:10.4322/0104-4931.ctoAO1078.  
26  
27 56 Lakatos I. Falsification and the Methodology of Scientific Research Programmes. In: *Lakatos*  
28 *I, Musgrave A, editors. Criticism and the Growth of Knowledge*. Cambridge: Cambridge  
29 University Press; 1970. p. 91–196  
30  
31 57 Long DM. Pragmatism, realism, and psychology: Understanding theory selection criteria. *J*  
32 *Contextual Behav Sci* 2013;**2**:61–7. doi:10.1016/J.JCBS.2013.09.003.  
33  
34 58 Satpute S, Cooper R, Dicianno BE, *et al.* Mini-review: Rehabilitation engineering: Research  
35 priorities and trends. *Neurosci Lett* 2021;**764**:136207. PMID: 34478814.  
36  
37 59 Best K, Smith E, Pellichero A, Sorita E, Archambault P, Kenyon L, *et al.* International  
38 research priorities on the role of cognition in power mobility device use: In pursuit of informed  
39 clinical practices and knowledge translation. *Assistive Technology*. 2021; **35**(2): 119-126.  
40  
41  
42  
43  
44  
45  
46 60 Alqahtani S, Joseph J, Dicianno B, *et al.* Stakeholder perspectives on research and  
47 development priorities for mobility assistive-technology: a literature review. *Disabil Rehabil*  
48 *Assist Technol* 2021;**16**:362–76. PMID: 31535934.  
49  
50 61 Fawcett J. Evaluating Conceptual-Theoretical-Empirical Structures for Research. In: Fawcett  
51 *J. The relationship of theory and research*. 3rd ed. Philadelphia: F.A. Davis Company; 1999.  
52 p.85-117.  
53  
54  
55 62 Stern C, Kleijnen J. Language bias in systematic reviews: You only get out what you put in.  
56 *JBI Evid Synth* 2020;**18**:1818–9. doi:10.11124/JBIES-20-00361.  
57  
58  
59  
60

- 1  
2  
3 63 Powell BJ, McMillen JC, Proctor EK, *et al.* A Compilation of Strategies for Implementing  
4 Clinical Innovations in Health and Mental Health. *Medical Care Research and Review*  
5 2012;**69**:123–57. PMID: 22203646.  
6  
7  
8 64 Powell BJ, Waltz TJ, Chinman MJ, *et al.* A refined compilation of implementation strategies:  
9 Results from the Expert Recommendations for Implementing Change (ERIC) project.  
10  
11 *Implementation Science* 2015;**10**:1–14. PMID: 25889199.  
12  
13 65 Powell BJ, Fernandez ME, Williams NJ, *et al.* Enhancing the Impact of Implementation  
14 Strategies in Healthcare: A Research Agenda. *Front Public Health* 2019;**7**. PMID: 30723713  
15  
16 66 Waltz TJ, Powell BJ, Fernández ME, *et al.* Choosing implementation strategies to address  
17 contextual barriers: Diversity in recommendations and future directions. *Implementation*  
18 *Science* 2019;**14**:1–15. PMID: 31036028.  
19  
20  
21  
22  
23  
24  
25  
26  
27  
28  
29  
30  
31  
32  
33  
34  
35  
36  
37  
38  
39  
40  
41  
42  
43  
44  
45  
46  
47  
48  
49  
50  
51  
52  
53  
54  
55  
56  
57  
58  
59  
60

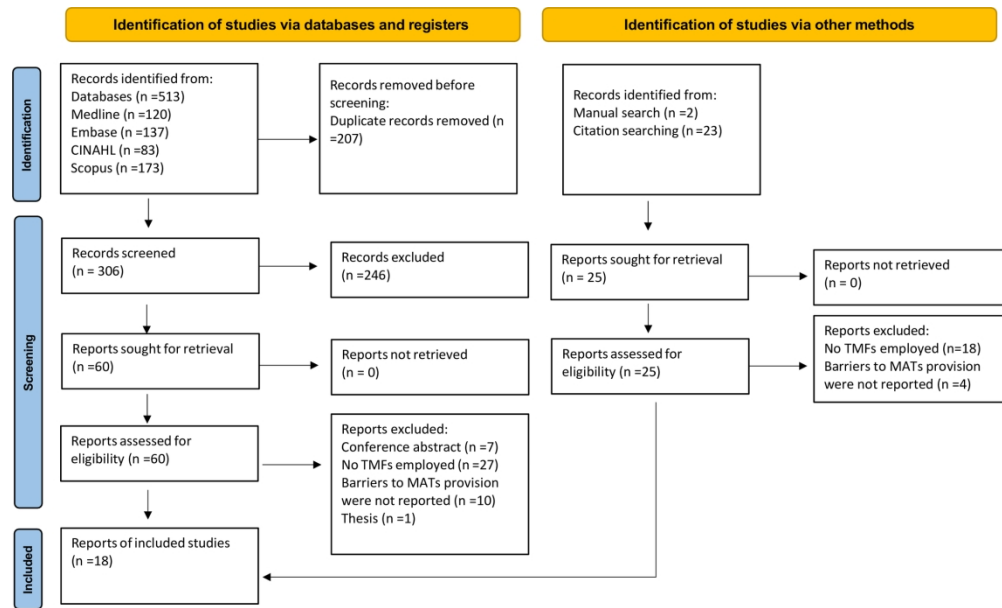

PRISMA flow diagram

190x114mm (300 x 300 DPI)



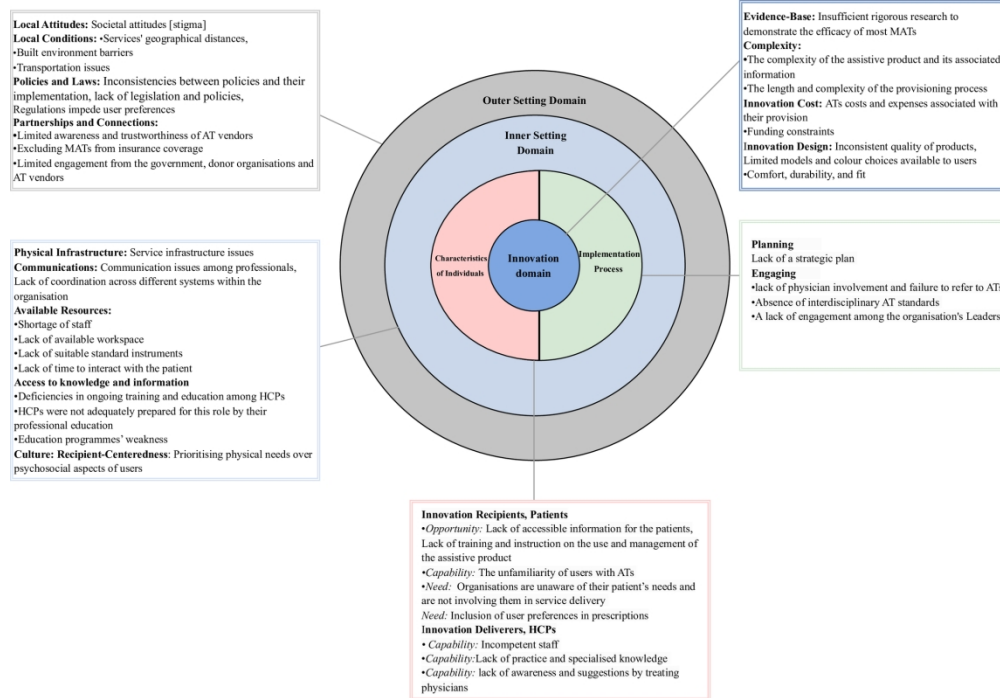

Barriers to the provision of MATs synthesised using the CFIR

190x133mm (300 x 300 DPI)



1  
2  
3  
4  
5  
6  
7  
8  
9  
10  
11  
12  
13  
14  
15  
16  
17  
18  
19  
20  
21  
22  
23  
24  
25  
26  
27  
28  
29  
30  
31  
32  
33  
34  
35  
36  
37  
38  
39  
40  
41  
42  
43  
44  
45  
46  
47  
48  
49  
50  
51  
52  
53  
54  
55  
56  
57  
58  
59  
60



Synthetic model

190x74mm (300 x 300 DPI)

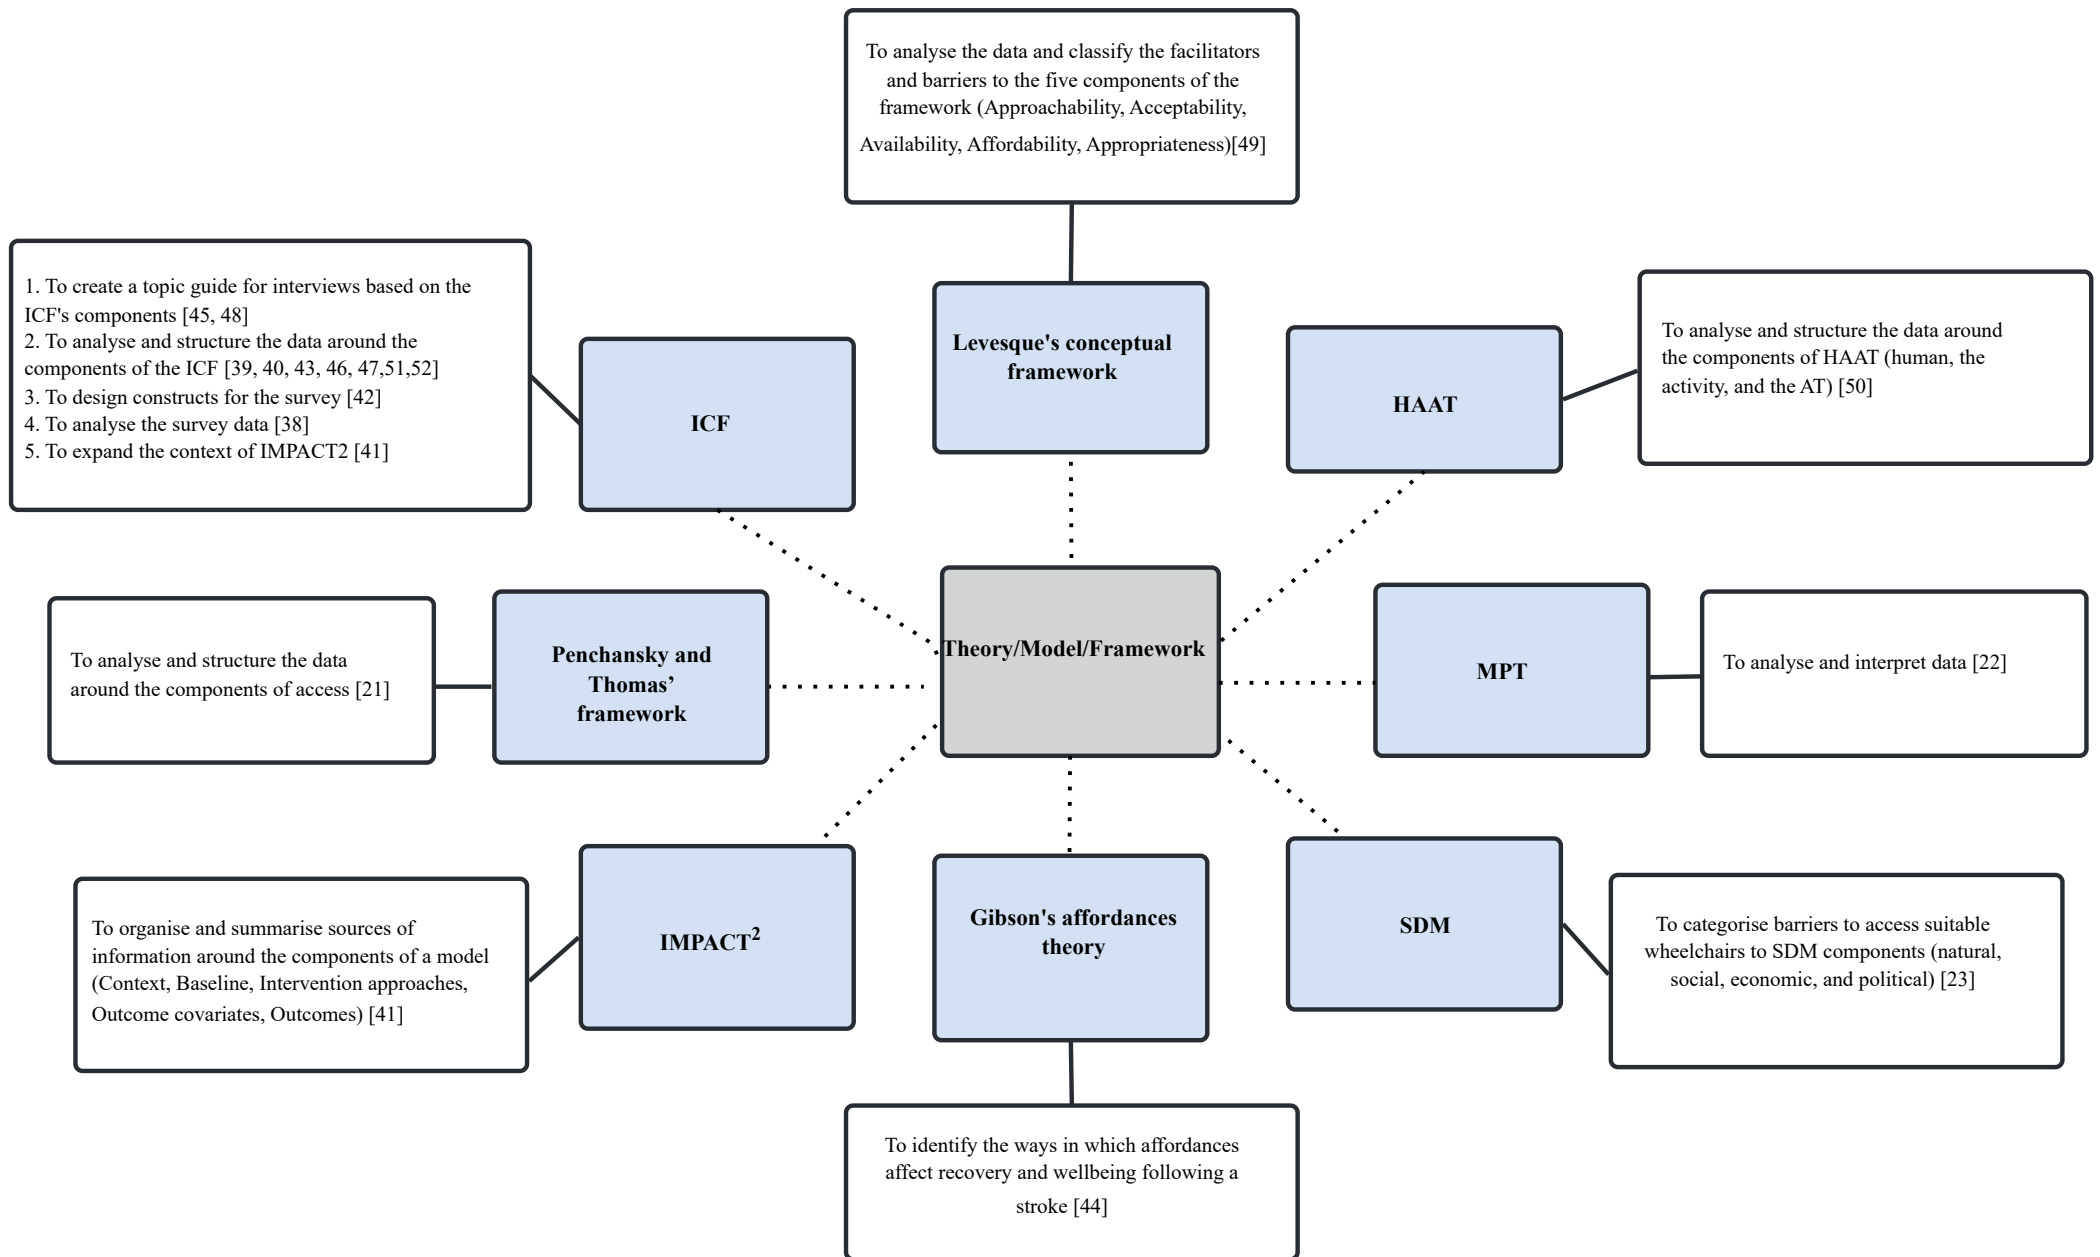

Theories, models and frameworks to understand barriers to the provision of mobility assistive technologies: A scoping review

Appendix 1. Preferred Reporting Items for Systematic reviews and Meta-Analyses extension for Scoping Reviews (PRISMA-ScR) Checklist

| SECTION                           | ITEM | PRISMA-ScR CHECKLIST ITEM                                                                                                                                                                                                                                                                                  | REPORTED ON PAGE #  |
|-----------------------------------|------|------------------------------------------------------------------------------------------------------------------------------------------------------------------------------------------------------------------------------------------------------------------------------------------------------------|---------------------|
| <b>TITLE</b>                      |      |                                                                                                                                                                                                                                                                                                            |                     |
| Title                             | 1    | Identify the report as a scoping review.                                                                                                                                                                                                                                                                   | #1                  |
| <b>ABSTRACT</b>                   |      |                                                                                                                                                                                                                                                                                                            |                     |
| Structured summary                | 2    | Provide a structured summary that includes (as applicable): background, objectives, eligibility criteria, sources of evidence, charting methods, results, and conclusions that relate to the review questions and objectives.                                                                              | #2                  |
| <b>INTRODUCTION</b>               |      |                                                                                                                                                                                                                                                                                                            |                     |
| Rationale                         | 3    | Describe the rationale for the review in the context of what is already known. Explain why the review questions/objectives lend themselves to a scoping review approach.                                                                                                                                   | #4-5                |
| Objectives                        | 4    | Provide an explicit statement of the questions and objectives being addressed with reference to their key elements (e.g., population or participants, concepts, and context) or other relevant key elements used to conceptualize the review questions and/or objectives.                                  | #5                  |
| <b>METHODS</b>                    |      |                                                                                                                                                                                                                                                                                                            |                     |
| Protocol and registration         | 5    | Indicate whether a review protocol exists; state if and where it can be accessed (e.g., a Web address); and if available, provide registration information, including the registration number.                                                                                                             | #5 (not registered) |
| Eligibility criteria              | 6    | Specify characteristics of the sources of evidence used as eligibility criteria (e.g., years considered, language, and publication status), and provide a rationale.                                                                                                                                       | #5-6                |
| Information sources*              | 7    | Describe all information sources in the search (e.g., databases with dates of coverage and contact with authors to identify additional sources), as well as the date the most recent search was executed.                                                                                                  | #6                  |
| Search                            | 8    | Present the full electronic search strategy for at least 1 database, including any limits used, such that it could be repeated.                                                                                                                                                                            | Appendix 2          |
| Selection of sources of evidence† | 9    | State the process for selecting sources of evidence (i.e., screening and eligibility) included in the scoping review.                                                                                                                                                                                      | #6                  |
| Data charting process‡            | 10   | Describe the methods of charting data from the included sources of evidence (e.g., calibrated forms or forms that have been tested by the team before their use, and whether data charting was done independently or in duplicate) and any processes for obtaining and confirming data from investigators. | #7                  |
| Data items                        | 11   | List and define all variables for which data were sought and any assumptions and simplifications made.                                                                                                                                                                                                     | #7                  |

Theories, models and frameworks to understand barriers to the provision of mobility assistive technologies: A scoping review

| SECTION                                                           | ITEM | PRISMA-ScR CHECKLIST ITEM                                                                                                                                                                             | REPORTED ON PAGE #                                |
|-------------------------------------------------------------------|------|-------------------------------------------------------------------------------------------------------------------------------------------------------------------------------------------------------|---------------------------------------------------|
| Critical appraisal of individual sources of evidence <sup>§</sup> | 12   | If done, provide a rationale for conducting a critical appraisal of included sources of evidence; describe the methods used and how this information was used in any data synthesis (if appropriate). | NA                                                |
| Synthesis of results                                              | 13   | Describe the methods of handling and summarizing the data that were charted.                                                                                                                          | #7                                                |
| <b>RESULTS</b>                                                    |      |                                                                                                                                                                                                       |                                                   |
| Selection of sources of evidence                                  | 14   | Give numbers of sources of evidence screened, assessed for eligibility, and included in the review, with reasons for exclusions at each stage, ideally using a flow diagram.                          | #8                                                |
| Characteristics of sources of evidence                            | 15   | For each source of evidence, present characteristics for which data were charted and provide the citations.                                                                                           | #8 and Appendix 3                                 |
| Critical appraisal within sources of evidence                     | 16   | If done, present data on critical appraisal of included sources of evidence (see item 12).                                                                                                            | NA                                                |
| Results of individual sources of evidence                         | 17   | For each included source of evidence, present the relevant data that were charted that relate to the review questions and objectives.                                                                 | #8-9, Figure 2, Supplemental Figure 1, Appendix 3 |
| Synthesis of results                                              | 18   | Summarize and/or present the charting results as they relate to the review questions and objectives.                                                                                                  | #8-12                                             |
| <b>DISCUSSION</b>                                                 |      |                                                                                                                                                                                                       |                                                   |
| Summary of evidence                                               | 19   | Summarize the main results (including an overview of concepts, themes, and types of evidence available), link to the review questions and objectives, and consider the relevance to key groups.       | #13                                               |
| Limitations                                                       | 20   | Discuss the limitations of the scoping review process.                                                                                                                                                | #13                                               |
| Conclusions                                                       | 21   | Provide a general interpretation of the results with respect to the review questions and objectives, as well as potential implications and/or next steps.                                             | #14                                               |
| <b>FUNDING</b>                                                    |      |                                                                                                                                                                                                       |                                                   |
| Funding                                                           | 22   | Describe sources of funding for the included sources of evidence, as well as sources of funding for the scoping review. Describe the role of the funders of the scoping review.                       | #15                                               |

JBI = Joanna Briggs Institute; PRISMA-ScR = Preferred Reporting Items for Systematic reviews and Meta-Analyses extension for Scoping Reviews.

\* Where *sources of evidence* (see second footnote) are compiled from, such as bibliographic databases, social media platforms, and Web sites.

† A more inclusive/heterogeneous term used to account for the different types of evidence or data sources (e.g., quantitative and/or qualitative research, expert opinion, and policy documents) that may be eligible in a scoping review as opposed to only studies. This is not to be confused with *information sources* (see first footnote).

‡ The frameworks by Arksey and O'Malley (6) and Levac and colleagues (7) and the JBI guidance (4, 5) refer to the process of data extraction in a scoping review as data charting.

§ The process of systematically examining research evidence to assess its validity, results, and relevance before using it to inform a decision. This term is used for items 12 and 19 instead of "risk of bias" (which is more

Theories, models and frameworks to understand barriers to the provision of mobility assistive technologies: A scoping review

applicable to systematic reviews of interventions) to include and acknowledge the various sources of evidence that may be used in a scoping review (e.g., quantitative and/or qualitative research, expert opinion, and policy document).

*From:* Tricco AC, Lillie E, Zarin W, O'Brien KK, Colquhoun H, Levac D, et al. PRISMA Extension for Scoping Reviews (PRISMA ScR): Checklist and Explanation. *Ann Intern Med.* 2018;169:467–473. doi: [10.7326/M18-0850](https://doi.org/10.7326/M18-0850)

For peer review only

## Appendix 2. Systematic search conducted in MEDLINE, EMBASE and CINAHL, SCOPUS

Database(s): Ovid MEDLINE(R) Search Strategy:

| #  | Query                                                                                                              | Results from 20 Mar 2024 |
|----|--------------------------------------------------------------------------------------------------------------------|--------------------------|
| 1  | (Access* adj10 (barrier* or challeng* or restrict* or obstacle* or impediment* or difficult* or issue*)).ab,ti.    | 65,894                   |
| 2  | (Provision* adj10 (barrier* or challeng* or restrict* or obstacle* or impediment* or difficult* or issue*)).ab,ti. | 8,001                    |
| 3  | (Provide* adj10 (barrier* or challeng* or restrict* or obstacle* or impediment* or difficult* or issue*)).ab,ti.   | 105,628                  |
| 4  | (Adoption* adj10 (barrier* or challeng* or restrict* or obstacle* or impediment* or difficult* or issue*)).ab,ti.  | 7,717                    |
| 5  | Wheelchairs/                                                                                                       | 5,516                    |
| 6  | Orthotic Devices/                                                                                                  | 7,001                    |
| 7  | Exoskeleton Device/                                                                                                | 1,615                    |
| 8  | Mobility device*.ab,ti.                                                                                            | 540                      |
| 9  | Mobility technolog*.ab,ti.                                                                                         | 52                       |
| 10 | Wheelchair*.ab,ti.                                                                                                 | 8,917                    |
| 11 | Scooter*.ab,ti.                                                                                                    | 848                      |
| 12 | Walker*.ab,ti.                                                                                                     | 15,484                   |
| 13 | Prosthetic*.ab,ti.                                                                                                 | 64,657                   |
| 14 | prosthesis/                                                                                                        | 50,316                   |
| 15 | orthotic*.ab,ti.                                                                                                   | 3,754                    |
| 16 | Self-Help Devices/                                                                                                 | 5,848                    |
| 17 | Exoskeleton*.ab,ti.                                                                                                | 4,775                    |
| 18 | Orthos*.ab,ti.                                                                                                     | 26,392                   |
| 19 | power mobility.ab,ti.                                                                                              | 135                      |
| 20 | Prosthe* device*.ab,ti.                                                                                            | 2,423                    |
| 21 | (Assistive technolog* adj10 mobility).ab,ti.                                                                       | 136                      |
| 22 | (Assistive device* adj10 mobility).ab,ti.                                                                          | 216                      |
| 23 | assistive product*.ab,ti.                                                                                          | 112                      |
| 24 | mobility product*.ab,ti.                                                                                           | 24                       |
| 25 | Disabled Persons/                                                                                                  | 48,539                   |
| 26 | Mobility Limitation/                                                                                               | 5,317                    |
| 27 | Elder*.ti,ab.                                                                                                      | 311,486                  |
| 28 | Physical* Disable*.ab,ti.                                                                                          | 948                      |
| 29 | Disable*.ab,ti.                                                                                                    | 29,670                   |
| 30 | Disabilit*.ab,ti.                                                                                                  | 251,101                  |
| 31 | Walking difficult*.ab,ti.                                                                                          | 690                      |
| 32 | Handicap*.ab,ti.                                                                                                   | 26,041                   |
| 33 | physical* impair*.ab,ti.                                                                                           | 3,209                    |
| 34 | physical* Challeng*.ab,ti.                                                                                         | 702                      |

|    |                                                                                                                 |           |
|----|-----------------------------------------------------------------------------------------------------------------|-----------|
| 35 | Ambulat* Difficult*.ab,ti.                                                                                      | 89        |
| 36 | Mobility difficult*.ab,ti.                                                                                      | 257       |
| 37 | Mobility impair*.ab,ti.                                                                                         | 1,395     |
| 38 | Mobility limit*.ab,ti.                                                                                          | 1,495     |
| 39 | Amput*.ab,ti.                                                                                                   | 54,202    |
| 40 | Motor difficult*.ab,ti.                                                                                         | 547       |
| 41 | Amputation/                                                                                                     | 24,156    |
| 42 | Geriatrics/                                                                                                     | 31,605    |
| 43 | (theor* or framework* or model* or taxonom* or classifi* or concept*).ab,ti.                                    | 5,861,883 |
| 44 | (Matching Person and Technology).ab,ti.                                                                         | 22        |
| 45 | ("abandonment" or "discontinuance") and "model").ab,ti.                                                         | 660       |
| 46 | 43 or 44 or 45                                                                                                  | 5,861,887 |
| 47 | 1 or 2 or 3 or 4                                                                                                | 179,053   |
| 48 | 25 or 26 or 27 or 28 or 29 or 30 or 31 or 32 or 33 or 34 or 35 or 36 or 37 or 38 or 39 or 40 or 41 or 42        | 698,993   |
| 49 | 44 or 45                                                                                                        | 680       |
| 50 | 5 or 6 or 7 or 8 or 9 or 10 or 11 or 12 or 13 or 14 or 15 or 16 or 17 or 18 or 19 or 20 or 21 or 22 or 23 or 24 | 178,356   |
| 51 | 43 and 47 and 48 and 50                                                                                         | 129       |
| 52 | limit 51 to english language                                                                                    | 123       |
| 53 | limit 52 to dt=20000101-20240320                                                                                | 120       |
| 54 | limit 53 to dt=20230615-20240320                                                                                | 7         |

Database(s): **Ovid Embase** Search Strategy:

| #  | Query                                                                                                              | Results from 20 Mar 2024 |
|----|--------------------------------------------------------------------------------------------------------------------|--------------------------|
| 1  | (Access* adj10 (barrier* or challeng* or restrict* or obstacle* or impediment* or difficult* or issue*)).ab,ti.    | 89,392                   |
| 2  | (Provision* adj10 (barrier* or challeng* or restrict* or obstacle* or impediment* or difficult* or issue*)).ab,ti. | 10,528                   |
| 3  | (Provide* adj10 (barrier* or challeng* or restrict* or obstacle* or impediment* or difficult* or issue*)).ab,ti.   | 132,393                  |
| 4  | (Adoption* adj10 (barrier* or challeng* or restrict* or obstacle* or impediment* or difficult* or issue*)).ab,ti.  | 9,027                    |
| 5  | Wheelchairs/                                                                                                       | 11,424                   |
| 6  | Orthotic Devices/                                                                                                  | 7,444                    |
| 7  | Exoskeleton Device/                                                                                                | 1,458                    |
| 8  | Mobility device*.ab,ti.                                                                                            | 660                      |
| 9  | Mobility technolog*.ab,ti.                                                                                         | 61                       |
| 10 | Wheelchair*.ab,ti.                                                                                                 | 13,417                   |
| 11 | Scooter*.ab,ti.                                                                                                    | 1,038                    |
| 12 | Walker*.ab,ti.                                                                                                     | 18,055                   |
| 13 | Prosthetic*.ab,ti.                                                                                                 | 77,235                   |
| 14 | prosthesis/                                                                                                        | 34,174                   |
| 15 | orthotic*.ab,ti.                                                                                                   | 5,418                    |
| 16 | Self-Help Devices/                                                                                                 | 3,039                    |
| 17 | Exoskeleton*.ab,ti.                                                                                                | 5,286                    |
| 18 | Orthos*.ab,ti.                                                                                                     | 36,589                   |
| 19 | power mobility.ab,ti.                                                                                              | 165                      |
| 20 | Prosthe* device*.ab,ti.                                                                                            | 2,837                    |
| 21 | (Assistive technolog* adj10 mobility).ab,ti.                                                                       | 169                      |
| 22 | (Assistive device* adj10 mobility).ab,ti.                                                                          | 306                      |
| 23 | assistive product*.ab,ti.                                                                                          | 120                      |
| 24 | mobility product*.ab,ti.                                                                                           | 24                       |
| 25 | Disabled Persons/                                                                                                  | 31,831                   |
| 26 | Mobility Limitation/                                                                                               | 14,932                   |
| 27 | Elder*.ti,ab.                                                                                                      | 441,358                  |
| 28 | Physical* Disable*.ab,ti.                                                                                          | 1,217                    |
| 29 | Disable*.ab,ti.                                                                                                    | 38,518                   |
| 30 | Disabilit*.ab,ti.                                                                                                  | 354,530                  |
| 31 | Walking difficult*.ab,ti.                                                                                          | 1,263                    |
| 32 | Handicap*.ab,ti.                                                                                                   | 31,792                   |
| 33 | physical* impair*.ab,ti.                                                                                           | 4,546                    |
| 34 | physical* Challeng*.ab,ti.                                                                                         | 970                      |
| 35 | Ambulat* Difficult*.ab,ti.                                                                                         | 134                      |
| 36 | Mobility difficult*.ab,ti.                                                                                         | 346                      |



|    |                                                                                                           |           |
|----|-----------------------------------------------------------------------------------------------------------|-----------|
| 37 | Mobility impair*.ab,ti.                                                                                   | 1,856     |
| 38 | Mobility limit*.ab,ti.                                                                                    | 1,969     |
| 39 | Amput*.ab,ti.                                                                                             | 67,937    |
| 40 | Motor difficult*.ab,ti.                                                                                   | 763       |
| 41 | Amputation/                                                                                               | 26,875    |
| 42 | Geriatrics/                                                                                               | 34,514    |
| 43 | (theor* or framework* or model* or taxonom* or classifi* or concept*).ab,ti.                              | 7,217,650 |
| 44 | (Matching Person and Technology).ab,ti.                                                                   | 32        |
| 45 | ((("abandonment" or "discontinuance") and "model").ab,ti.                                                 | 817       |
| 46 | 43 or 44 or 45                                                                                            | 7,217,657 |
| 47 | 5 or 6 or 7 or 8 or 9 or 10 or 11 or 12 or 13 or 15 or 16 or 17 or 18 or 19 or 20 or 21 or 22 or 23 or 24 | 161,702   |
| 48 | 25 or 26 or 27 or 28 or 29 or 30 or 31 or 32 or 33 or 34 or 35 or 36 or 37 or 38 or 39 or 40 or 41 or 42  | 952,247   |
| 49 | 1 or 2 or 3 or 4                                                                                          | 230,360   |
| 50 | 47 and 48 and 49                                                                                          | 517       |
| 51 | 46 and 50                                                                                                 | 140       |
| 52 | limit 51 to english language                                                                              | 137       |
| 53 | limit 52 to dc=20000101-20240320                                                                          | 137       |
| 54 | limit 53 to dc=20230615-20240320                                                                          | 10        |

## Database(s): EBSCO CINAHL Search Strategy:

| #   | Query                                                                                                                                                    | Results from 20 Mar 2024 |
|-----|----------------------------------------------------------------------------------------------------------------------------------------------------------|--------------------------|
| S51 | S50 AND EM 20230620-20240320                                                                                                                             | 4                        |
| S50 | S49 AND EM 20000101-20240320                                                                                                                             | 83                       |
| S49 | S46 AND S47 AND S48 AND S43<br>Limiters - Language: English                                                                                              | 85                       |
| S48 | S25 OR S26 OR S27 OR S28 OR S29 OR S30 OR S31 OR S32 OR S33 OR S34 OR S35 OR S36 OR S37 OR S38 OR S39 OR S40 OR S41 OR S42                               | 295,499                  |
| S47 | S5 OR S6 OR S7 OR S8 OR S9 OR S10 OR S11 OR S12 OR S13 OR S14 OR S15 OR S16 OR S17 OR S18 OR S19 OR S20 OR S21 OR S22 OR S23 OR S24                      | 42,407                   |
| S46 | S1 OR S2 OR S3 OR S4                                                                                                                                     | 73,563                   |
| S45 | TI ("abandonment" or "discontinuance") and "model") OR AB ("abandonment" or "discontinuance") and "model")                                               | 206                      |
| S44 | TI "Matching Person and Technology" OR AB "Matching Person and Technology"                                                                               | 22                       |
| S43 | TI ( theor* OR framework* OR model* OR taxonom* OR classifi* OR concept* ) OR AB ( theor* OR framework* OR model* OR taxonom* OR classifi* OR concept* ) | 1,068,768                |
| S42 | (MH "Geriatrics")                                                                                                                                        | 6,055                    |
| S41 | (MH "Amputation")                                                                                                                                        | 7,658                    |
| S40 | TI "Motor difficult*" OR AB "Motor difficult*"                                                                                                           | 246                      |
| S39 | TI Amput* OR AB Amput*                                                                                                                                   | 15,119                   |
| S38 | TI "Mobility limit*" OR AB "Mobility limit*"                                                                                                             | 964                      |
| S37 | TI "Mobility impair*" OR AB "Mobility impair*"                                                                                                           | 800                      |
| S36 | TI "Mobility difficult*" OR AB "Mobility difficult*"                                                                                                     | 164                      |
| S35 | TI "Ambulat* Difficult*" OR AB "Ambulat* Difficult*"                                                                                                     | 26                       |
| S34 | TI "physical* Challeng*" OR AB "physical* Challeng*"                                                                                                     | 389                      |
| S33 | TI "physical* impair*" OR AB "physical* impair*"                                                                                                         | 1,735                    |
| S32 | TI Handicap* OR AB Handicap*                                                                                                                             | 6,455                    |
| S31 | TI "Walking difficult*" OR AB "Walking difficult*"                                                                                                       | 233                      |
| S30 | TI Disabilit* OR AB Disabilit*                                                                                                                           | 127,711                  |
| S29 | TI Disable* OR AB Disable*                                                                                                                               | 12,959                   |
| S28 | TI "Physical* Disable*" OR AB "Physical* Disable*"                                                                                                       | 450                      |
| S27 | TI Elder* OR AB Elder*                                                                                                                                   | 114,817                  |
| S26 | (MH "Physical Mobility")                                                                                                                                 | 7,752                    |
| S25 | (MH "Persons with Disabilities")                                                                                                                         | 37,552                   |
| S24 | TI "mobility product*" OR AB "mobility product*"                                                                                                         | 6                        |
| S23 | TI "assistive product*" OR AB "assistive product*"                                                                                                       | 69                       |
| S22 | TI ("Assistive device*" n10 mobility) OR AB ("Assistive device*" n10 mobility)                                                                           | 152                      |
| S21 | TI ("Assistive technolog*" n10 mobility) OR AB ("Assistive technolog*" n10 mobility)                                                                     | 130                      |
| S20 | TI "Prosthet* device*" OR AB "Prosthet* device*"                                                                                                         | 410                      |
| S19 | TI "power mobility" OR AB "power mobility"                                                                                                               | 136                      |
| S18 | TI Orthose* OR AB Orthose*                                                                                                                               | 2,497                    |
| S17 | TI Exoskeleton* OR AB Exoskeleton*                                                                                                                       | 807                      |
| S16 | (MH "Assistive Technology Devices")                                                                                                                      | 6,723                    |
| S15 | TI orthotic* OR AB orthotic*                                                                                                                             | 2,695                    |
| S14 | (MH "Limb Prosthesis")                                                                                                                                   | 3,004                    |
| S13 | TI Prosthetic* OR AB Prosthetic*                                                                                                                         | 12,859                   |

|     |                                                                                                                                                                                                                                      |        |
|-----|--------------------------------------------------------------------------------------------------------------------------------------------------------------------------------------------------------------------------------------|--------|
| S12 | TI Walker* OR AB Walker*                                                                                                                                                                                                             | 3,882  |
| S11 | TI Scooter* OR AB Scooter*                                                                                                                                                                                                           | 449    |
| S10 | TI Wheelchair* OR AB Wheelchair*                                                                                                                                                                                                     | 5,801  |
| S9  | TI "Mobility technolog*" OR AB "Mobility technolog*"                                                                                                                                                                                 | 39     |
| S8  | TI ( "Mobility device*") OR AB ("Mobility device*")                                                                                                                                                                                  | 425    |
| S7  | (MH "Exoskeleton Devices")                                                                                                                                                                                                           | 328    |
| S6  | (MH "Orthoses")                                                                                                                                                                                                                      | 7,208  |
| S5  | (MH "Wheelchairs")                                                                                                                                                                                                                   | 5,126  |
| S4  | TI ( (Adoption* n10 (barrier* or challeng* or restrict* or obstacle* or impediment* or difficult* or issue*)) ) OR AB ( (Adoption* n10 (barrier* or challeng* or restrict* or obstacle* or impediment* or difficult* or issue*)) )   | 3,266  |
| S3  | TI ( Provide* n10 (barrier* or challeng* or restrict* or obstacle* or impediment* or difficult* or issue*)) ) OR AB ( Provide* n10 (barrier* or challeng* or restrict* or obstacle* or impediment* or difficult* or issue*)) )       | 40,826 |
| S2  | TI ( (Provision* n10 (barrier* or challeng* or restrict* or obstacle* or impediment* or difficult* or issue*)) ) OR AB ( (Provision* n10 (barrier* or challeng* or restrict* or obstacle* or impediment* or difficult* or issue*)) ) | 5,207  |
| S1  | TI ( (Access* n10 (barrier* or challeng* or restrict* or obstacle* or impediment* or difficult* or issue*)) ) OR AB ( (Access* n10 (barrier* or challeng* or restrict* or obstacle* or impediment* or difficult* or issue*)) )       | 29,412 |

Database(s): **Scopus** Search Strategy:  
Results from 20 Mar 2024

```
(( ( TITLE-ABS ( access* W/10 ( barrier* OR challeng* OR restrict* OR obstacle* OR impediment* OR difficult*
OR issue* ) ) ) ) OR ( ( TITLE-ABS ( provision* W/10 ( barrier* OR challeng* OR restrict* OR obstacle* OR
impediment* OR difficult* OR issue* ) ) ) ) OR ( ( TITLE-ABS ( provide* W/10 ( barrier* OR challeng* OR restrict*
OR obstacle* OR impediment* OR difficult* OR issue* ) ) ) ) OR ( ( TITLE-ABS ( adoption* W/10 ( barrier* OR
challeng* OR restrict* OR obstacle* OR impediment* OR difficult* OR issue* ) ) ) ) ) AND ( TITLE-ABS ( "Disabled
Person*" OR "Mobility* Limitation*" OR elder* OR "Physically Disabled" OR disable* OR disabilit* OR "Walking
difficult*" OR handicap* OR "physically impair*" OR "Physically Challeng*" OR "Ambulat* difficult*" OR
"Mobility difficult*" OR "Mobility impair*" OR "Mobility limit*" OR "Amput*" OR "Motor difficult*" OR
amputation* ) ) AND ( TITLE-ABS ( theor* OR framework* OR model* OR taxonom* OR classifi* OR concept* OR
"Matching Person and Technology" OR ( abandonment OR discontinuance AND model ) ) ) AND ( TITLE-ABS (
wheelchair* OR "power mobility*" OR "Mobility device*" OR "Mobility technolog*" OR ( "Assistive technolog*"
W/10 mobility ) OR ( "Assistive device*" W/10 mobility ) OR orthotic* OR exoskeleton* OR scooter* OR walker*
OR prosthet* OR orthos* OR prosthetic* OR "Prosthe* device*" OR orthotic* OR "mobility product*" OR
"assistive product*" ) ) AND PUBYEAR > 1999 AND PUBYEAR < 2025 AND ( LIMIT-TO ( LANGUAGE , "English" ) )
173 documents
```

Theories, models and frameworks to understand barriers to the provision of mobility assistive technologies: A scoping review

Appendix 3, Table. Characteristics of included papers

| Authors and Year                           | Study design                            | Aims of the study                                                                                                          | Population (n, characteristics)                      | Country                                 |
|--------------------------------------------|-----------------------------------------|----------------------------------------------------------------------------------------------------------------------------|------------------------------------------------------|-----------------------------------------|
| McIntyre, Cleland and Ramklass (2021) [49] | Qualitative, Semi-structured interviews | To explore facilitators and barriers to accessible wheelchair services                                                     | 11(8 occupational therapists and 3 physiotherapists) | South Africa                            |
| Dorjbal et al. (2020) [48]                 | Qualitative, Semi-structured interviews | To identify environmental barriers and their influence on daily life                                                       | 16(SCI patients)                                     | Mongolia                                |
| Jindal et al. (2018) [46]                  | Qualitative, Semi-structured interviews | To investigate parents' perceptions of rehabilitation and their information needs for their child with cerebral palsy (CP) | 18 (parents of children with CP)                     | India and Canada                        |
| Bhidayasiri et al. (2022) [50]             | Review article                          | To present clinical viewpoints on the unfulfilled needs of wearable technology, such as exoskeletons and orthoses          | N/A                                                  | N/A                                     |
| Layton (2012) [38]                         | Mixed method                            | To identify barriers and facilitators to optimal mobility from the perspective of AT users                                 | 100 (AT users. Neurological conditions)              | Australia, Survey, Open-ended responses |
| Mairami et al. (2017) [44]                 | Qualitative, case study, Semi-          | 1. To illustrate how AT influences stroke recovery and how the                                                             | 1(Stroke patient)                                    | Malaysia                                |

Theories, models and frameworks to understand barriers to the provision of mobility assistive technologies: A scoping review

|                                               |                                         |                                                                                                                              |                                                       |             |
|-----------------------------------------------|-----------------------------------------|------------------------------------------------------------------------------------------------------------------------------|-------------------------------------------------------|-------------|
|                                               | structured interview                    | environment might be altered to facilitate recovery<br>2. To examine the issues of AT affordability and accessibility        |                                                       |             |
| Dwyer and Mulligan (2015) [40]                | Literature review                       | To determine the obstacles and enablers for community reintegration as experienced by individuals with SCI                   | A total of 373 participants in the 7 included studies | New Zealand |
| Seymour, Geiger and Scheffler (2019) [47]     | Qualitative, Focus group                | To identify the issues associated with wheelchair provision and the elements that contribute to or mitigate these challenges | 21 (Community rehabilitation workers)                 | Uganda      |
| Gonçalves Junior, Knabben and Luz (2017) [43] | Qualitative, Semi-structured interviews | To demonstrate how people with lower limb amputation function and express their limitations                                  | 6 (patients with amputation)                          | Brazil      |
| Arthanat, Elsaesser and Bauer (2017) [42]     | Quantitative, Survey                    | To explore how AT providers perceive their education and training, the use of evidence and guidelines, financing policies.   | 318 (AT providers)                                    | US          |
| Gowran et al. (2021) [23]                     | Position Paper                          | To examine the global challenges related to wheelchair accessibility                                                         | N/A                                                   | N/A         |
| Steel and Layton (2016) [41]                  | Feature Article                         | An exploration of the complexities of AT provision in Australia                                                              | N/A                                                   | Australia   |
| Widehammar et al. (2020) [45]                 | Qualitative, Semi-structured interviews | An exploration of how users' experiences of power mobility products                                                          | 14(AT users)                                          | Sweden      |

Theories, models and frameworks to understand barriers to the provision of mobility assistive technologies: A scoping review

|                                      |                                                |                                                                                                                                              |                                                      |                |
|--------------------------------------|------------------------------------------------|----------------------------------------------------------------------------------------------------------------------------------------------|------------------------------------------------------|----------------|
|                                      |                                                | are influenced by environmental factors                                                                                                      |                                                      |                |
| Hammel et al. (2013) [39]            | Qualitative, multiple case study, Focus groups | Multiple stakeholders' perspectives, issues, and priorities related to accessing, using, and evaluating MATs                                 | 65(45 AT users, 10 caregivers, 10 service providers) | USA and Canada |
| Serres-Lafontaine et al. (2023) [51] | Qualitative, photovoice method                 | To study how peer training affects social involvement                                                                                        | 10 Wheelchair users (SCI patients)                   | Tanzania       |
| Oskar et al. (2011) [22]             | A postal questionnaire                         | To explore and assess the experiences of active wheelchair prescribers under the regulations and provisions set by local Swedish governments | 278 prescribers                                      | Sweden         |
| Smith et al. (2016) [52]             | Review article                                 | To investigate the determinants influencing participation among wheelchair users                                                             | 35 studies were included                             | N/A            |
| Nabizadeh et al., (2023) [16]        | Qualitative, Semi-structured interviews        | To explore barriers and facilitators to prosthetic services for lower limb amputees                                                          | 29 individuals with lower limb amputation            | Iran           |

Theories, models and frameworks to understand barriers to the provision of mobility assistive technologies: A scoping review

**Appendix 4 Table. Propositions identified in the theories, models and frameworks**

| Name of the theory,<br>model or framework                                 | Propositions                                                                                                                                                                                                                                                                                                                                                                                                                                                                                                                                                                                                                                                                                                                                                                                                                        |
|---------------------------------------------------------------------------|-------------------------------------------------------------------------------------------------------------------------------------------------------------------------------------------------------------------------------------------------------------------------------------------------------------------------------------------------------------------------------------------------------------------------------------------------------------------------------------------------------------------------------------------------------------------------------------------------------------------------------------------------------------------------------------------------------------------------------------------------------------------------------------------------------------------------------------|
| International Classification of Functioning, Disability, and Health (ICF) | <ol style="list-style-type: none"> <li>1. A health condition can affect both the mental and physical body functions.</li> <li>2. An individual's activities are impacted by their health condition.</li> <li>3. Health conditions affect an individual's engagement in activities, determining their level of participation.</li> <li>4. External factors, for example, social factors, can either inhibit or facilitate an individual's level of functioning.</li> <li>5. Society may create barriers, for example, inaccessible services or lack of facilitators, such as the unavailability of AT, which can affect an individual's performance.</li> <li>6. An individual's functioning is affected by the presence or absence of services, for example, equipment, products, and technologies in their environment.</li> </ol> |



Theories, models and frameworks to understand barriers to the provision of mobility assistive technologies: A scoping review

---

7. External elements like systems and policies that regulate and facilitate the provision of services can impact a person's functional capacity.
  8. An individual's level of functioning can also be influenced by external factors such as support and relationships, including family, people in positions of authority, and health professionals.
  9. Personal factors of an individual represent their internal aspects, including psychological factors, that can affect their level of functioning.
  10. Individuals' functioning and disabilities are influenced by their health status as well as contextual factors, such as environmental and personal factors.
  11. Functioning is defined as encompassing body functions, body structures, activities, and participation.
-

Theories, models and frameworks to understand barriers to the provision of mobility assistive technologies: A scoping review

---

12. An impairment, an activity limitation, or a restriction on participation constitutes a disability.

---

Levesque's conceptual framework

1. The concept of approachability is related to the ability of individuals with health needs to recognise the existence of available services, access them, and receive effective healthcare that can improve their health.
  2. Cultural and social factors determine the acceptability of health services within their context.
  3. The reachability of health services depends on their physical presence and timeliness.
  4. Factors like personal mobility, transportation availability, adaptability in occupation, and knowledge of accessible health services are interconnected and contribute to an individual's capacity to access healthcare providers physically.
-

Theories, models and frameworks to understand barriers to the provision of mobility assistive technologies: A scoping review

---

5. The concept of affordability in healthcare refers to the ability of people to pay for services without causing undue financial hardship or affecting their ability to afford basic necessities.
  6. The ability to afford healthcare services is connected to a person's financial resources, including income, savings, and borrowing capacity.
  7. Appropriateness in healthcare refers to the fit between the services provided and the needs and preferences of clients, as well as the quality and safety of those services.
  8. Engaging in healthcare involves the active participation of clients in decision-making and treatment planning, which helps to ensure that care is aligned with their goals and values.
  9. Accessibility of health services is affected by the availability of information.
-

Theories, models and frameworks to understand barriers to the provision of mobility assistive technologies: A scoping review

---

10. Personal autonomy and the ability to choose care-seeking are linked to the ability to access health care.

---

The Human Activity Assistive Technology model (HAAT)

1. AT enhances an individual's capabilities to complete desired tasks.
  2. Human activities are essential, learnable, and influenced by societal and cultural contexts.
  3. The use of desired technology is influenced by human skills and abilities (physical, cognitive, emotional).
  4. An individual's ability to perform activities is affected by their skills and abilities (physical, cognitive, emotional).
  5. The use of AT to perform an activity is influenced by various factors in the environment, including physical, social, cultural, and institutional elements.
-

Theories, models and frameworks to understand barriers to the provision of mobility assistive technologies: A scoping review

- 
6. Choosing and implementing the right AT requires considering the interaction between different elements, including the activity being performed, the user's needs and abilities, and the broader environmental context in which the technology will be used.
  7. The process of performing an activity leads to a functional result of human performance.

---

Gibson's affordances theory

1. Cognition: Affordances exist as a cognitive process which comes through people and organisations interacting with material entities.
  2. Perception: Affordances need to be perceived or recognised by the person or organisation.
  3. Behaviour: the affordance is actualised as the behaviour that people/organisations adopt acting on the perceived opportunity for action.
-

Theories, models and frameworks to understand barriers to the provision of mobility assistive technologies: A scoping review

---

4. Evaluation: Evaluating the effects of this behaviour.

5. Environmental factors and structures can impact disabilities.

---

Systemic development model (SDM)

1. Understanding personal, organisational, and institutional capacity requires consideration of factors such as health, culture, economics, and politics.
  2. It is crucial to provide appropriate services to improve the health, well-being, and fundamental freedoms of individuals in need.
  3. Limited access to services can create a cycle of poverty and disability.
  4. Service delivery systems that are tailored to specific contexts play a significant role in ensuring appropriate service provision.
  5. Economic factors impact the availability of products and services
-

Theories, models and frameworks to understand barriers to the provision of mobility assistive technologies: A scoping review

---

and can affect the viability of service provision.

6. Evaluation of the quality, development, performance, and procurement standards of products is crucial for improving service delivery systems and individual health outcomes.
7. Political governance also plays a role in ensuring access to appropriate services.

---

Multi Intervention Paradigm for Assessment and Application of Concurrent Treatments (IMPACT<sup>2</sup>)

1. The results of interventions can be outlined by examining the six phases, including: 1) Pre-Intervention, 2) Context, 3) Baseline, 4) Intervention Strategies, 5) Outcome Covariates, and 6) Outcomes.
  2. Personal and contextual factors influence the products and services used by individuals to perform activities.
-

Theories, models and frameworks to understand barriers to the provision of mobility assistive technologies: A scoping review

---

3. Universal design and health promotion are two methods that can be utilised to enhance functional performance.
  4. The context in which AT is used to perform a task within an environment is crucial for improving participation and QoL.
  5. Intervention approaches, such as reducing the impairment, compensating for the impairment, using AT, and redesigning the activity, are used to support the use of AT and optimise an individual's functioning.
  6. Consumer satisfaction is a desirable outcome of AT provision.
  7. Outcome(function) is defined as participation, QoL, and engagement.
  8. Cost influences the Intervention approaches therefore affecting Outcomes.
-



Theories, models and frameworks to understand barriers to the provision of mobility assistive technologies: A scoping review

---

Matching Person and Technology (MPT )

1. AT serves as a bridge between individual capabilities and the demands of tasks within their environment.
  2. Personal autonomy and the performance of everyday activities are enhanced by integrating technology that matches individual needs.
  3. The compatibility of assistive products with the user's lifestyle is crucial for successful adoption and satisfaction.
  4. The user's physical, cognitive, and emotional dimensions must be considered to optimise the functionality of AT.
  5. AT should empower individuals, promoting independence and self-efficacy in their desired roles and activities.
  6. The design and functionality of assistive technology must reflect the
-

Theories, models and frameworks to understand barriers to the provision of mobility assistive technologies: A scoping review

---

user's self-image and socio-cultural identity to foster acceptance.

7. AT should assist and elevate the user's ability to engage in social roles and activities with confidence and ease.
8. The choice of AT is personal, influenced by individual preferences, aspirations, and the context of their lives.
9. Effective AT integrates into the user's environment, enhancing their capabilities without introducing new barriers.
10. The success of an assistive product is measured not only by its technical features but also by its ability to align with the user's psychosocial context and enhance their QoL.

---

Penchansky and Thomas' framework of access

1. Access is defined by the degree to which healthcare systems are
-

Theories, models and frameworks to understand barriers to the provision of mobility assistive technologies: A scoping review

---

equipped to meet the requirements of patients

2. Affordability assesses whether the costs imposed by the provider align with the client's financial capacity and willingness to pay for the services offered.
  3. Availability refers to the provider's capacity to meet the client's needs through adequate resources, including staff and technology.
  4. Accessibility concerns the ease with which clients can physically reach the provider's location.
  5. Accommodation evaluates the extent to which the provider's operational procedures, such as hours of operation and telephone communication, are convenient for the client.
  6. Acceptability pertains to the degree of comfort the client experiences with the provider's fixed characteristics and encompasses considerations of the client's
-

Theories, models and frameworks to understand barriers to the provision of mobility assistive technologies: A scoping review

---

health condition and type of health

coverage.

---

For peer review only

Theories, models and frameworks to understand barriers to the provision of mobility assistive technologies: A scoping review

Appendix 5, Table. Gaps analysis

| Gaps                             | Recommendations for future research                                                                                                                                                                                                                                                                                                                                                                                                 |
|----------------------------------|-------------------------------------------------------------------------------------------------------------------------------------------------------------------------------------------------------------------------------------------------------------------------------------------------------------------------------------------------------------------------------------------------------------------------------------|
| Remote Regions and Accessibility | Key areas for future investigation included examining access to AT in remote regions [38, 49, 46] by investigating challenges and barriers faced in remote regions [49], and explore the differences between men and women in accessing services [16], and concentrating on modifiable elements like wheelchair skills and ease of access [51]                                                                                      |
| Stakeholder Perspectives         | The included papers in this review draw attention to several issues, such as investigating policymakers' and HCPs' views on rehabilitation services [46]. Understanding the challenges faced by people with disabilities [51]. This includes understanding stakeholder perspectives on the various aspects of access by identifying the enablers and barriers that might aid in planning to increase access to AT services [47,49]. |
| Funding, Policy, and Legislation | Future research should investigate funding and policy-related barriers [ 22, 40, 42, 48], the impact of legislation on accessibility and participation for powered mobility product users [45], fostering low-cost approaches in low- and middle-income countries [44], and promoting inclusive solutions for wheelchair service provision [23,51].                                                                                 |

Theories, models and frameworks to understand barriers to the provision of mobility assistive technologies: A scoping review

|                                                 |                                                                                                                                                                                                                                                                                                                                                                                                                                                           |
|-------------------------------------------------|-----------------------------------------------------------------------------------------------------------------------------------------------------------------------------------------------------------------------------------------------------------------------------------------------------------------------------------------------------------------------------------------------------------------------------------------------------------|
| Data Collection and methodological improvements | Adoption of standardised instruments to assess functioning and disability is needed [43,45]. Comparing perceptions users with and without AT [43,45]. Exploration of user satisfaction, choice, and control in relation to MATs and its impact on overall outcomes [39]. Development of standards for testing AT effectiveness [50]. Additionally, research could explore the long-term effects of delayed services on individuals with disabilities [16] |
| Contextual Understanding and service evaluation | Importance of investigating in-country perspectives consideration of personal, social, economic, environmental, historical, and political factors [23]. Incorporating subjective measures in service evaluations [41]. Assessing the effects of new products on work environments and identifying the annually prescribed types of AT are essential undertakings [22].                                                                                    |

# BMJ Open

## Theories, models and frameworks to understand barriers to the provision of mobility assistive technologies: A scoping review

|                                 |                                                                                                                                                                                                                                                                                                                                                                                                                                                                 |
|---------------------------------|-----------------------------------------------------------------------------------------------------------------------------------------------------------------------------------------------------------------------------------------------------------------------------------------------------------------------------------------------------------------------------------------------------------------------------------------------------------------|
| Journal:                        | <i>BMJ Open</i>                                                                                                                                                                                                                                                                                                                                                                                                                                                 |
| Manuscript ID                   | bmjopen-2023-080633.R3                                                                                                                                                                                                                                                                                                                                                                                                                                          |
| Article Type:                   | Original research                                                                                                                                                                                                                                                                                                                                                                                                                                               |
| Date Submitted by the Author:   | 30-Apr-2024                                                                                                                                                                                                                                                                                                                                                                                                                                                     |
| Complete List of Authors:       | Aldawood, Asma; The University of Sheffield, School of Medicine and Population Health; King Saud bin Abdulaziz University for Health Sciences, College of Applied Medical Sciences<br>Hind, Daniel; The University of Sheffield, School of Medicine and Population Health<br>Rushton, Simon; University of Sheffield, Department of Politics and International Relations<br>Field, Becky; The University of Sheffield, School of Medicine and Population Health |
| <b>Primary Subject Heading</b>: | Health services research                                                                                                                                                                                                                                                                                                                                                                                                                                        |
| Secondary Subject Heading:      | Health services research                                                                                                                                                                                                                                                                                                                                                                                                                                        |
| Keywords:                       | Health Services Accessibility, Self-Help Devices, Disabled Persons, Review                                                                                                                                                                                                                                                                                                                                                                                      |
|                                 |                                                                                                                                                                                                                                                                                                                                                                                                                                                                 |

SCHOLARONE™  
Manuscripts



I, the Submitting Author has the right to grant and does grant on behalf of all authors of the Work (as defined in the below author licence), an exclusive licence and/or a non-exclusive licence for contributions from authors who are: i) UK Crown employees; ii) where BMJ has agreed a CC-BY licence shall apply, and/or iii) in accordance with the terms applicable for US Federal Government officers or employees acting as part of their official duties; on a worldwide, perpetual, irrevocable, royalty-free basis to BMJ Publishing Group Ltd ("BMJ") its licensees and where the relevant Journal is co-owned by BMJ to the co-owners of the Journal, to publish the Work in this journal and any other BMJ products and to exploit all rights, as set out in our [licence](#).

The Submitting Author accepts and understands that any supply made under these terms is made by BMJ to the Submitting Author unless you are acting as an employee on behalf of your employer or a postgraduate student of an affiliated institution which is paying any applicable article publishing charge ("APC") for Open Access articles. Where the Submitting Author wishes to make the Work available on an Open Access basis (and intends to pay the relevant APC), the terms of reuse of such Open Access shall be governed by a Creative Commons licence – details of these licences and which [Creative Commons](#) licence will apply to this Work are set out in our licence referred to above.

Other than as permitted in any relevant BMJ Author's Self Archiving Policies, I confirm this Work has not been accepted for publication elsewhere, is not being considered for publication elsewhere and does not duplicate material already published. I confirm all authors consent to publication of this Work and authorise the granting of this licence.



1  
2  
3 **Theories, models and frameworks to understand barriers to the provision**  
4 **of mobility assistive technologies: A scoping review**  
5  
6  
7

8 Asma Aldawood<sup>1,2\*</sup>, Daniel Hind<sup>1</sup>, Simon Rushton<sup>3</sup>, Becky Field<sup>1</sup>  
9

10  
11 *1. School of Medicine and Population Health, The University of Sheffield, Sheffield, UK*  
12

13  
14 *2. King Saud bin Abdulaziz University for Health Sciences, Riyadh, Saudi Arabia*  
15

16  
17 *3. Department of Politics and International Relations, The University of Sheffield, Sheffield, UK.*  
18  
19  
20  
21  
22

23  
24 \*Corresponding author  
25

26 Email: [aaldawood2@sheffield.ac.uk](mailto:aaldawood2@sheffield.ac.uk) (AA)  
27  
28  
29  
30  
31  
32  
33  
34  
35  
36  
37  
38  
39  
40  
41  
42  
43  
44  
45  
46  
47  
48  
49  
50  
51  
52  
53  
54  
55  
56  
57  
58  
59  
60

## Abstract

**Objectives** There is strong evidence that mobility-assistive technologies improve occupational performance, social participation, educational and employment access, and overall quality of life in people with disabilities. However, people with disabilities still face barriers in accessing mobility products and related services. This review aims to summarise and synthesise: 1) theories, models, and frameworks that have been used to understand mobility-assistive technology access, 2) determinants of access, and 3) gaps in knowledge.

**Design** A Scoping review using the five-step Arksey and O'Malley Framework.

**Data sources** We searched the MEDLINE, EMBASE, CINAHL, and SCOPUS databases for publications published between 2000 and 2024. We searched for articles published up to 20 March 2024.

**Eligibility criteria** We included English-published literature in peer-reviewed journals that reported (a) barriers to the provision of mobility-assistive technologies, (b) including at least one theory, model, or framework, and (c) between 2000 and 2024.

**Data extraction and synthesis** We extracted the study characteristics, theories, models, framework usage, research recommendations, key findings on mobility-assistive technology barriers, and theoretical propositions. We conduct a theoretical synthesis guided by Turner's approach.

**Results** We included 18 articles that used eight theories, models, and frameworks, synthesised into nine propositions. The synthesised theory emphasises that mobility is essential for human flourishing, and that certain health conditions may impose restrictions on mobility. This impact can be alleviated by two direct determinants: (1) the provision of suitable services and (2) their comprehensive provision. Policies and costs influence these services indirectly. Environmental and personal factors also affect the use of these services. Ineffectively addressing these determinants can limit access to mobility-assistive technologies and subsequent disabilities.

**Conclusion** Our synthetic model describes the logic of providing evidence-based mobility-assistive technologies, and we identify the determinants of access which can act as targets for future work to improve mobility-assistive technologies provision.

## Strengths and limitations of this study

- We used a comprehensive search strategy developed with an information specialist to identify relevant publications.
- We mapped reported barriers to a widely used conceptual framework - the Consolidated Framework for Implementation Research - for consistent terminology.
- We conducted a theoretical synthesis to generate new insights.
- We excluded non-English studies, potentially limiting the applicability of our findings.
- We exclude grey literature, which further narrows the scope of the review.

For peer review only

## INTRODUCTION

Neurological conditions, musculoskeletal disorders, and ageing are associated with considerable human burdens, including decreased quality of life (QoL) [1,2], activity limitations [3], participation restrictions [4,5], increased dependence, and caregiver burden [6]. Mobility-assistive technologies (MATs) are vital for addressing the challenges posed by these conditions, as they can help improve QoL, promote independence, enhance occupational performance, increase participation, and alleviate the burden on individuals, families, and societies [7]. MATs encompass assistive products for mobility and related systems and services [7]. These assistive products include devices, software, or instruments specifically designed or widely available to enhance the functioning of an individual [8]. They support or substitute the ability to move, thereby facilitating movement from one location to another [8]. Examples include wheelchairs, walking frames, rollators, and prosthetic and orthotic products [8].

Wheeled mobility products, prosthetics, and orthotics are cost-effective for improving the QoL and independence of people with disabilities [9,10]. Despite being endorsed by the United Nations [11] and World Health Organization (WHO) [7], which are essential for creating equitable opportunities for people with disabilities, access to these MATs remains limited [7,12]. There is a considerable unmet need for MATs worldwide, with only a small percentage of those who require them having access [7,12]. Access to assistive technology (AT) is defined as the equitable and sustainable provision of assistive products and support services that adhere to six key principles: accessibility, affordability, availability, adaptability, acceptability, and quality [7]. These principles ensure that assistive products and services are reachable, cost-effective, adaptable to individual needs, culturally appropriate, widely available, and of high quality [7].

The reasons for the unmet need for MATs are poorly understood but include the absence of national policies, high costs, and insufficiently trained personnel [7]. Several pre-existing theories, models, and frameworks (TMFs) have been used to understand the determinants of access and uptake, each with different conceptual coverage and terminology, which could help plan corrective actions. A framework is a structure for organising concepts that enable the description of phenomena [13,14]. For instance, Levesque's conceptual framework defines five dimensions of healthcare accessibility: approachability, acceptability, availability, affordability, and appropriateness [15]. This framework builds upon Penchansky and Thomas' foundational work, which originally identified the key dimensions of access to healthcare services as availability, accessibility, accommodation, affordability, and acceptability. These dimensions define access by assessing how well healthcare systems are prepared to meet patients' needs [16]. The International Classification of Functioning, Disability, and Health framework (ICF) is a framework developed by the WHO that classifies the health and disability components of functioning and contextual factors [17]. These include multi-aspect concepts related to body functions, structures, activities, participation, and environmental factors [17].

A model is a simplified representation of reality that holds for a specific case or population [13,18,19]; models may describe the relationship between their components but tend to be descriptive rather than explanatory [13]. For example, the Human Activity Assistive Technology (HAAT) model describes the interaction between human activity, AT, and the physical, social, and cultural contexts in which it is used [20]. The integrated multi-intervention paradigm for the assessment and application of concurrent treatments (IMPACT<sup>2</sup>) model describes the variables related to AT interventions [21]. The Matching Person and Technology (MPT) is a model that describes the interaction between environmental, personal, and technological factors in the success of AT uptake [22]. The Systemic Development Model (SDM), developed by the World Engagement Institute (WEI), describes four

interconnected pillars of sustainability—health, culture, economics, and politics—to enhance the understanding of capacities at the personal, organisational, and institutional levels [23].

A theory is an interconnected set of abstract statements that explain, predict, or prescribe phenomena, going beyond specific contexts to consider broader meanings and implications [13,14,18,24]. For instance, Gibson's theory proposes that the environment contains actionable (and therefore explanatory) properties, "affordances", that are directly perceived [25]. When a research area is characterised by theoretical incoherence, researchers must choose between rigid empiricism, selecting theories based on their virtues, developing their own theory, and theoretical synthesis [26]. Theoretical synthesis can amalgamate propositions from different theories into a propositional network, enabling researchers to extend the coverage, content validity, and document points of convergence [26]. Scoping reviews are ideal for uncovering key concepts and informing future research designs [27]. This paper presents a scoping review that summarises and synthesises the TMFs used to understand MAT access, identifies the determinants of access, and highlights the gaps in current knowledge.

## METHOD

We report a five-stage scoping review based on the approach outlined by Arksey and O'Malley [28], in line with the Preferred Reporting Items for Systematic Reviews and Meta-Analyses extension for Scoping Reviews (PRISMA-ScR) (online supplemental appendix 1) [29]. This study did not meet the eligibility requirements for registration using PROSPERO. The research questions were as follows: What theories, models, and frameworks have been used to understand the barriers to the provision of MATs for people with mobility issues? What are the determinants of access to MATs for people with mobility issues? What are the current knowledge gaps in access to MATs for people with mobility issues?

### Eligibility criteria

The Behaviour of Interest, Health Context, Exclusion, Models, or Theories (BeHEMoTH) framework [30] was employed to formulate the search concepts (Table 1) and eligibility criteria (Table 2).

**Table 1 Application of the BeHEMoTH framework to define search concepts**

| BeHEMoTH                           | Concept                              |
|------------------------------------|--------------------------------------|
| <b>Be – Behaviour of interest:</b> | Barriers to access or provision      |
| <b>H – Health context</b>          | People with mobility issues AND MATs |
| <b>E – Exclusions</b>              | NA                                   |
| <b>MoTh – Models or Theories</b>   | Models or Theories or Frameworks     |

**Table 2 Inclusion and exclusion criteria**

| Inclusion criteria | Exclusion criteria | Rationale |
|--------------------|--------------------|-----------|
|--------------------|--------------------|-----------|

|                                                                 |                                                                                                       |                                                                                                   |
|-----------------------------------------------------------------|-------------------------------------------------------------------------------------------------------|---------------------------------------------------------------------------------------------------|
| Publications reporting on the barriers to the provision of MATs | Publication concentrates on aspects other than barriers to access, and there is no report on barriers | This review focuses on understanding barriers to the provision of MATs                            |
| Publications including at least a theory, model, or framework   | Publications that did not employ a theory, model, or framework                                        | To ensure that the articles concentrate on theory, model, or framework to understand the barriers |
| Publications in peer-reviewed journals                          | Other publications such as conference abstracts and theses                                            | To ensure that studies had undergone rigorous evaluation                                          |
| Publications published in the English language                  | Publications in other languages                                                                       | Costs and time commitment associated with article translation                                     |
| Publications between 2000 and 2024                              | Publication published before 2000                                                                     | To ensure using the most relevant publications from the previous 24 years                         |

## Information sources and Searches

Literature searches were performed by (AA) on MEDLINE (Ovid), EMBASE (Ovid), CINAHL (EBSCO), and SCOPUS databases for studies published between 1 January 2000 and 20 March 2024. To identify the appropriate publications relevant to the research issue, a *priori* search strategy was established in collaboration with the authors (AA and DH) and an information specialist (FZ). The search terms combined the concepts of ‘barriers to provision, mobility issues, AND ‘MATs’, and a theory/model/framework’. Free text terms, subject heading, use of the Boolean operators "AND" and "OR", and truncation were all used to ensure a successful search. The final search strategy was tested on MEDLINE via Ovid, and then translated into other databases. The full search strategy and results are presented in online supplemental appendix 2. We reviewed the reference lists of the included articles to identify additional relevant articles [28] but restricted the eligibility to peer-reviewed studies, excluding grey literature.

## Study selection

The Rayyan platform (<https://www.rayyan.ai>) was used for study selection. Initial title and abstract screening were conducted by (AA), where the primary aim was to assess studies for potential relevance based on predefined inclusion and exclusion criteria. Given the subjective nature of this assessment, any uncertainties regarding study eligibility encountered by AA were systematically discussed with the other reviewers (DH, SR, and BF). Full-text screening involved consistent discussions among (AA, DH, SR, and BF), and the full texts of eligible articles were subsequently retrieved for a more detailed assessment.

## Data charting process

To facilitate consistent data presentation and synthesis, we charted general and study-specific information from the studies in Microsoft Excel spreadsheets. Data items included country of origin, study population, aims, sample size, study design, data collection tool, TMF used, a brief description of its purpose, research recommendations, and key findings related to barriers to the provision of MATs. We extracted theoretical propositions from the TMFs, as discussed in the articles included in our review. In instances in which these articles did not provide a comprehensive explanation of TMFs, such as Gibson's affordances theory, the IMPACT<sup>2</sup> model, and the HAAT model, we referred to the foundational sources. The sources cited within the included articles are original materials in which TMFs were first introduced or explained thoroughly. This ensured that our understanding and coverage of TMFs was comprehensive, especially when the application of these TMFs in the reviewed articles lacked depth. Although these foundational sources were not directly included in our review as they did not meet our inclusion criteria, they were consulted for additional insights. We mapped the reported barriers to one of the updated constructs of the Consolidated Framework for Implementation Research (CFIR), a synthetic framework of constructs used in 19 implementation theories [31,32], using a codebook (<https://cfirguide.org/>). The CFIR provides a set of standardised constructs to guide researchers, creating a common language for explicitly and consistently describing aspects that may affect the provision [33].

## Synthesis of results

Tabular summaries and narrative syntheses were completed for the included articles and their TMFs [34]. We conducted a theoretical synthesis to generate new insights that were unavailable for any TMF [35]. The synthesis was guided by Turner's [36] approach. In Step 1, the TMFs are summarised, and their shared themes are identified. In Step 2, the aspects of the TMF that pertain to core concepts by extracting the phrases used, their definitions, and their explicit and implicit relationships are identified. In Step 3, the TMFs are broken into simple propositions that can be compared and tabulated. In Step 4, the theories are compared and determined how they converge or diverge by combining similar elements. In Step 5, the convergent elements from the TMF are combined into a single conceptual model that focuses on the relationships between concepts. For example, during this stage, we examined how concepts from these TMFs—such as cost, services, and activity (mobility)—interacted and influenced each other within the synthesised theory to gain theoretical insight. We incorporated statements from the studies included in this review to strengthen the synthesis and support the resulting conceptual model (Step 6).

## Gaps analysis

To identify knowledge gaps and areas for future research, we reviewed papers and tabulated explicit recommendations, which is a core function of scoping reviews [27].

## Patients and public involvement

No patients or public were involved in the study.



## RESULTS

### Characteristics of the studies

The literature search yielded 306 citations after the removal of duplicates. A total of 246 citations were excluded after initial screening, and 60 potentially eligible articles were retrieved for full-text review. Of these, 45 were excluded because barriers were not reported ( $n=10$ ), TMFs were not reported ( $n=27$ ), and the citations were conference abstracts ( $n=7$ ) or theses ( $n=1$ ). Fifteen studies identified from the databases met all the eligibility criteria. After reviewing the reference lists and conducting manual searches, 25 additional studies were identified and examined for eligibility, and three studies were determined to be eligible (Figure 1) [37].

#### Figure 1 PRISMA flow diagram.

The final synthesis included 18 articles (online supplemental appendix 3) [16,22,23,38–52]. Eight studies addressed the challenges associated with the provision and use of MATs [16,22,23,38,39,42,44,47,49,50]. Four studies examined environmental barriers to participation [40,45,48,51,52]. Two studies explored the experiences of patients and caregivers and their rehabilitation needs [43,46]. One study drew attention to inconsistencies in AT provision schemes [41]. There were ( $n=5$ ) secondary studies and ( $n=13$ ) primary research studies conducted between 2012 and 2023 in South Africa [49], Mongolia [48], Canada, India [46], Australia [38,41], Malaysia [44], New Zealand [40], Uganda [47], Brazil [43], United States [42], Iran [16], Sweden [22,45], Tanzania [51], Canada, and the United States [39]. The primary studies contained between one and 318 participants.

Eight TMFs, representing various perspectives, were identified. Two were biopsychosocial in orientation: the ICF [17] and HAAT [20], which focused on AT. Two other models that focus on AT are IMPACT<sup>2</sup> [21] and MPT [22]. Four other identified TMFs were applied to AT access: Penchansky and Thomas's framework [16], Levesque's theoretical framework [15], Gibson's affordances theory [25], and the SDM [53]. The most frequently used TMF was ICF ( $n=12$ ). All included studies applied one TMF, except for one [41], which used two in combination: ICF and IMPACT<sup>2</sup>. There are three distinct applications of TMFs, as shown in Supplemental Figure 1. The majority were used as a basis for analysis and interpretation ( $n=13$ ) or as a guide for designing the surveys and interviews ( $n=2$ ). In addition, TMFs were used as a comprehensive framework to provide a context for reviewing the relevant literature ( $n=3$ ).

### Barriers to MATs provision synthesised using CFIR

The key barriers in the innovation domain are cost concerns [16,23,38–42,44,46,48,49], intervention complexity [23,39,45,47], inadequate evidence of effectiveness [41,42], product-related factors such as comfort, durability, and fit [52]; and limited models and colour choices available [22] (Figure 2). The outer-setting domain highlights societal attitudes toward AT [22,47,48,50,52], geographic distance [16,41,43,49], a lack of supportive legislation [16,23,39,45,47,48,50,51], and environmental barriers [22,52]. Within the inner-setting domain, resource constraints [23,42,43,47,49], restricted knowledge, and information access hinder provision [23,38,39,42,47,50]. The characteristics of the individuals' domains revealed knowledge about the intervention [23,47,48,50] and low self-efficacy among healthcare professionals [16,42,49] as barriers to its adoption. In addition, within the



1  
2  
3 characteristics of individual domains, barriers include limited information access [16,38–40,43,45,49],  
4 such as a lack of access to training and instructions on the use and management of mobility products  
5 [16]. Furthermore, there is a lack of awareness among users [49,50], and insufficient inclusion of user  
6 preferences in prescriptions [22]. In the process domain, barriers include insufficient stakeholder  
7 engagement [39,42,50], absence of interdisciplinary standards [42], and limited strategic planning  
8 [39].  
9  
10

11 **Figure 2 Barriers to the provision of MATs synthesised using the CFIR.**  
12  
13

## 14 **Theories, Models and Frameworks (TMF) Synthesis**

15 The propositions derived from the theories, models, and frameworks are described in Supplemental  
16 Appendix 4, and the resulting synthetic model is presented in Figure 3.  
17  
18  
19

20 **Figure 3 Synthetic model.**  
21  
22

### 23 **Proposition 1: mobility is essential for human flourishing**

24  
25 The ICF framework highlights activity as a key component of health, with disabilities resulting from  
26 restricted activities, such as mobility issues [17]. This affects participation in everyday activities, such  
27 as work, socialisation, and healthcare access [17]. The HAAT model explains a similar concept,  
28 describing the 'activity' as the action of performing a task that represents the functional outcome of  
29 human performance [20]. Building on these insights, 'mobility' is viewed as an individual's ability to  
30 perform tasks that enable meaningful participation. The HAAT model and IMPACT<sup>2</sup> emphasise the  
31 importance of participation in everyday activities, such as working and socialising, for overall health  
32 [20,21], describing it as "necessary to human existence" [20]. According to the HAAT model, humans  
33 are defined based on their intrinsic physical, cognitive, and emotional abilities [20]. Accordingly,  
34 mobility is viewed more as a necessary means of meaningful participation than an end to the  
35 development of physical, cognitive, and psychosocial skills throughout life [38,46]  
36  
37  
38  
39  
40

### 41 **Proposition 2: health conditions and personal factors influence mobility**

42  
43 An individual's mobility is influenced by health and personal factors, which, in turn, affect their  
44 participation in social, work, and leisure activities. For example, the ICF framework clearly describes  
45 how health issues and personal factors can affect activities and participation [17] and describes health  
46 conditions as umbrella terms for diseases, disorders, injuries, or trauma [17]. Similarly, the HAAT  
47 model highlights the impact of a person's physical and cognitive abilities and personal elements, such  
48 as emotional and psychological factors, on their ability to perform activities [46]. Accordingly,  
49 'personal factors' that encompass elements, such as psychological attributes, age, and coping style  
50 influence an individual's ability to perform activities [17]. For example, Dwyer and Mulligan [40]  
51 highlighted how emotional changes caused by spinal cord injury (SCI) could impede participation in  
52 rehabilitation services and other areas of reintegration, such as employment and leisure activities.  
53  
54  
55  
56

### 57 **Proposition 3: appropriate services influence mobility**

58  
59  
60

1  
2  
3 The ICF and HAAT models explicitly describe the relationships between the activities and their  
4 environments. Both emphasise the importance of activities for participating in and developing in life,  
5 and some interventions can improve a person's ability to engage in the desired activities [17,20]. For  
6 instance, in the ICF framework, AT services are considered to be an environmental factor, which is  
7 appropriate for helping individuals achieve their intended activities and participate in various  
8 situations [17]. Similarly, the MPT model was developed considering the ICF framework and  
9 focusing on the relationship between individuals and AT [54]. This suggests that AT is an essential  
10 means of bridging the gap between an individual's capabilities and the demands of tasks in their  
11 environment, thereby significantly enhancing their engagement in the desired activities [22].  
12 Levesque's framework, building upon the foundational work of Penchansky and Thomas, identifies  
13 that 'the appropriateness of a service' is determined by its alignment with the needs of the client,  
14 whereas the HAAT and MPT models emphasise that with AT, an individual's capabilities are  
15 increased [15,16,20,22]. Consequently, to meet individual needs and maximise capabilities, we define  
16 the appropriateness of services based on the extent to which they are tailored. This demonstrates that  
17 MATs are vital for people with disabilities and for older people who require them, thus enhancing  
18 their independence and participation in daily life [38,46].  
19  
20  
21  
22  
23

#### 24 **Proposition 4: service delivery must be comprehensive to influence human** 25 **mobility**

26  
27  
28 Institutional factors significantly influence individual activities, as explained by the HAAT model  
29 [20] and ICF frameworks [17]. Levesque's framework emphasises the importance of how services are  
30 provided to meet client needs [15], whereas Penchansky and Thomas highlight the necessity of  
31 adequate resources, including staff, to ensure that these needs are effectively met [16]. Similarly, the  
32 IMPACT<sup>2</sup> model is concerned with providing services and ensuring that outcomes are met, including  
33 QOL, participation, and satisfaction with the services provided [21]. The MPT model demonstrates  
34 that user satisfaction with service provision can be achieved by considering key features of products  
35 such as usability, quality, weight, stability, and safety [22]. Accordingly, the concept of  
36 'comprehensive services' refers to providing clients with high-quality products and the necessary  
37 support services to meet their needs and achieve satisfaction. Providing comprehensive services  
38 encompassing assessment, training, and maintenance is crucial for enhancing personal mobility  
39 [23,39]. Effective delivery of AT services requires well-trained personnel [23]. These are critical  
40 components of service delivery systems that help individuals enhance their mobility.  
41  
42  
43  
44  
45

#### 46 **Proposition 5: environmental factors influence individuals' decision to seek** 47 **appropriate health care services**

48  
49  
50 Assistive products for mobility and participation are influenced by environmental factors such as  
51 social, cultural, and physical environments, which affect individuals' health and well-being. The ICF  
52 framework views disability as a health experience arising from context and not solely within an  
53 individual [17]. It emphasises how society can create barriers such as inaccessible services or  
54 neglected facilitators, such as the lack of AT [17]. Furthermore, an individual's level of functioning is  
55 determined by their relationships with family, people, and healthcare providers, all of which can  
56 influence their decision to seek healthcare [17]. A similar concept of how society affects activities is  
57 highlighted by the HAAT model, which places particular emphasis on an individual's cultural context  
58 [20]. The MPT model also emphasises the role of sociocultural factors, acknowledging how a user's  
59  
60

1  
2  
3 social setting and cultural attitudes towards disability can influence their perception of and adoption  
4 of mobility products. This includes consideration of product-related social implications and stigmas  
5 [22]. For example, parents of children with disabilities oppose wheelchairs because of social stigma  
6 [46], and some older people perceive mobility products negatively because of stigmatising symbolism  
7 [50]. This demonstrates the significant influence of sociocultural factors, such as support and  
8 relationships from family, health professionals, and community on MAT accessibility and acceptance.  
9 Furthermore, the MPT model emphasises the importance of the physical environment, which includes  
10 both the built environment within the user's home and the external surroundings, in affecting use and  
11 acceptance [22]. For example, if a wheelchair does not fit the physical and psychosocial environment  
12 in which it is used, it is more likely to limit function rather than enhance it [22]. Therefore, the  
13 success of MAT is not measured solely by its technical features but also by its ability to fit into the  
14 user's psychosocial context [22].  
15  
16  
17  
18

### 19 Proposition 6: policies influence the provision of services 20

21  
22 The SDM framework highlights how organisational service delivery policies influence appropriate  
23 service provision [53], whereas the ICF explains how policies affect participation and activities [17].  
24 As part of the ICF, the term 'policy' is commonly used within the environmental factor domain as an  
25 external factor that can impact an individual's health and function [17]. This set of guidelines, rules,  
26 and regulations governs the range of services provided to individuals, including policies and standards  
27 that define the eligibility criteria for services [45]. For instance, prostheses are not considered to be  
28 life-saving medical devices or crucial components of the healthcare system [43]. However, they are  
29 life-changing for users and can quickly restore most functions [43]. Levesque's framework argues that  
30 the availability of health services should ensure those in need can access either the physical facilities  
31 or healthcare personnel [15]. However, barriers to access emerge when healthcare is unavailable in  
32 certain geographic areas or when individuals' insurance does not cover the necessary treatments  
33 [15,16]. Penchansky and Thomas further emphasised the need for a well-organised supply of  
34 resources, including the integration of telephone or remote service consultations [16]. The lack of  
35 such accommodations can prevent individuals from obtaining the required healthcare, potentially  
36 leading to adverse health outcomes. Disparities between government and institutional policies can  
37 result in confusion among AT providers and decrease service utilisation [23,47].  
38  
39  
40  
41  
42

### 43 Proposition 7: cost influences the provision of appropriate services 44

45  
46 The SDM framework [53] highlights the significant influence of economic factors on service delivery  
47 and reinforces the idea that costs can significantly influence access to healthcare services. The term  
48 'cost' refers to the expenses incurred by individuals and healthcare systems to provide services  
49 [15,21]. This comprises the direct prices of services such as consultation fees, product costs, and  
50 related expenses [15]. For instance, the IMPACT<sup>2</sup> model underlines the role of cost implications in  
51 selecting intervention approaches and demonstrating the cost effects at each stage of AT provision  
52 [21]. Both Penchansky and Thomas [16] and Levesque et al. [15] emphasised the critical role of an  
53 individual's financial capacity, including income and willingness to pay, in accessing healthcare.  
54 Therefore, costs can significantly influence access to AT.  
55  
56  
57

### 58 Proposition 8: personal factors influence healthcare utilisation 59 60

1  
2  
3 Healthcare utilisation is influenced by various 'personal factors' that represent an individual's internal  
4 aspects, such as psychological characteristics [17]. This concept is explained using Levesque's  
5 framework. It highlights factors such as an individual's need for care, awareness of these needs, and  
6 desire for treatment [15]. Gibson's affordance theory suggests that an individual's perception of their  
7 environment is based on its potential to fulfil their needs, thereby shaping their decisions [25].  
8 Therefore, the individual is responsible for unravelling the utility presented by affordance. For  
9 instance, the client in Mairami et al. [44] adapted a chair from a home to a wheelchair. This  
10 demonstrates how the client's perception of their environment shaped their recovery when an existing  
11 structure was found to have assistive potential. The ICF model explains the significance of  
12 environmental factors, such as the visibility of services, in determining an individual's level of  
13 functioning [17], which is related to Gibson's affordance theory, in which environmental cues trigger  
14 actions [25]. Consequently, the lack of service limits the activities that can be conducted. Personal  
15 factors not classified within the ICF are acknowledged to have a significant impact on healthcare  
16 access [17]. The MPT model highlights that the choice of assistive products is deeply personal and  
17 shaped by individual aspirations, anticipated satisfaction of needs, and perceived personal value of  
18 these products [22]. These elements play a crucial role in influencing the uptake of MATs, as they are  
19 associated with the context of users' lives [22].  
20  
21  
22  
23  
24  
25  
26

### 27 **Proposition 9: limited access to healthcare services creates disability**

28  
29 The ICF acknowledges the influence of environmental factors on disability development and  
30 emphasises the limitations it imposes on individuals' abilities to access healthcare services and engage  
31 in social activities [17]. As defined by the ICF, disabilities include impairments, limitations in activity  
32 levels, and restrictions on participation [17]. Consequently, restricted AT accessibility impairs body  
33 function, hinders participation, and contributes to disabilities. The SDM framework explains the  
34 significance of economic factors, particularly the "lack of economic means", which limit access to  
35 services such as MAT [53]. Restricted access can trigger continuous cycles of disabilities and poverty  
36 [23]. Persistent mobility constraints, whether due to inadequate MAT service support or diminished  
37 participation in daily life, have been identified as significant factors leading to disability [47,48].  
38  
39  
40  
41

### 42 **Gaps analysis**

43  
44 This review highlights key research areas in AT services that warrant further investigation (online  
45 supplemental appendix 5). Investigations should focus on AT access in remote regions [38,46,49],  
46 examine gender disparities in service accessibility [16], explore stakeholder perspectives on  
47 rehabilitation services and barriers to AT access [47,49,51], and address challenges related to funding,  
48 policy, and legislation [22,23,40,42,44,48,51]. Data collection and methodological enhancements are  
49 required, including standardised instruments for assessing functioning and disability [43,45],  
50 comparisons of user experiences with and without AT [39,41], and comprehensive evaluation tools  
51 combining objective and subjective measures [39,41]. Emphasis should also be placed on  
52 understanding the in-country perspectives, inclusive solutions, and the impact of contextual factors on  
53 AT access [23]. This involves evaluating how new products impact workplace settings and  
54 determining which types of AT are essential [22]. Future studies should examine product  
55 compatibility, enhance user skills, and improve accessibility to the built environment [52]. Addressing  
56 these research gaps could contribute to the development of more effective, inclusive, and accessible  
57 AT services for individuals with disabilities.  
58  
59  
60

## DISCUSSION

This scoping review offers a summary of the barriers to MAT provision and synthesis theories to guide future work based on 18 articles. The synthesised theory emphasises that mobility is essential for human flourishing (Proposition 1) and that certain health conditions may impose restrictions on mobility (Proposition 2). This impact can be ameliorated by two direct determinants: the provision of suitable services (Proposition 3) and their comprehensive provision (Proposition 4). Policies (Proposition 6) and costs (Proposition 7) indirectly influence these services. Furthermore, an individual's decision to access these services is determined by their environment (Proposition 5) and personal factors (Proposition 8). If these direct and indirect determinants are not effectively addressed, it could result in limited access to MATs and subsequent disability (Proposition 9). This synthesised theory integrates empirical and ethical dimensions and provides evidence-based approaches to solving problems [18].

To the best of our knowledge, this is the first report on the synthesis of TMFs and the barriers to MAT provision. Although De Alves and Matsukura's [55] literature review outlined the various theoretical models used in the AT literature, they did not attempt theoretical synthesis. TMFs organise concepts and thoughts to provide insights into different elements of practice and research [13]. Lakatos proposes that scientific enquiry should appraise a series of theories rather than a single theory, noting that "the members of such series of theories are usually connected by a remarkable continuity which welds them into research programmes" [56]. Lakatos advocated for a 'pluralistic model' of scientific theories, in which several theories, which are organised deductively to varying degrees, are brought together in a unified approach [56]. Unlike Lakatos, we view this study as an enhancement of problem-solving effectiveness [57]. By combining propositions from different theories, we increased the coverage of the resulting syntheses of individual theories. It should predict the range of barriers encountered in MAT access and provision.

The theory covers a socially significant issue given that it addresses the current research priorities identified by expert panels organised by government agencies and clinical speciality organisations [7,58–60]. It addresses the phenomenon of interest to rehabilitation scholars by filling the gaps in the existing TMFs. Although the MPT model does not explicitly discuss barriers to AT access, it provides valuable insights into the interactions between the personal, technological, and environmental factors that influence successful AT adoption [22]. The MPT model, developed based on the ICF framework [54], highlights the importance of aligning assistive products with user needs, preferences, and contexts to optimise functionality and satisfaction. Future research should further explore how the MPT model can inform strategies to address barriers to access and provision of MAT.

An adequate specification was achieved by providing a clear and concise overview of the theoretical synthesis. In addition, we establish linkage adequacy by defining the concepts and their relationships [61]. The theory is testable because it contains observable concepts and propositions that can be operationalised and corroborated in empirical research. A limitation of the scoping review was the exclusion of non-English language studies, which could limit the applicability of the findings; research from other languages could have offered additional valuable insights [62]. Another limitation is that the review's focus on studies from 2000 to 2024 potentially omitted earlier relevant research on barriers and TMF. However, a broader historical scope may have reduced the relevance of the findings to contemporary decision-making in the provision of AT. The exclusion of grey literature, including government reports and policy documents, further narrowed the scope of the review. This exclusion may have resulted in the omission of relevant non-peer-reviewed TMFs. In addition, the processes of data extraction, coding using CFIR, and synthesis inherently involve subjectivity. Our search strategies and the databases selected may not have captured all relevant literature pertaining to



1  
2  
3 other important TMFs that have been used to understand barriers to MAT access, such as the Student,  
4 Environment, Tasks, and Tools (SETT) [63] and the Wisconsin Assistive Technology Initiative  
5 (WATI) [64]. Despite using SETT and WATI as search terms, these terms yielded no results in the  
6 databases we explored. This could indicate a lack in the literature where these frameworks are applied  
7 or reported in relation to barriers to MAT access, which requires further investigation. Search terms  
8 such as 'service delivery,' 'service\*,' 'deliver\*,' and additional or alternative terms for older people,  
9 such as 'older person\*' or 'older adult\*,' may have identified additional studies.

10  
11 Our review highlights several key knowledge gaps regarding MAT access and provision.  
12 These include the need for research on AT access in remote regions, stakeholder perspectives on  
13 barriers and enablers, funding and policy challenges, and the impact of contextual factors  
14 [23,38,40,42,44,46,47,49,51]. Methodological improvements such as the adoption of standardised  
15 instruments and the incorporation of user satisfaction measures are also needed to advance the field  
16 [39,41,43,45]. Importantly, the widely used ICF framework does not include personal factors that play  
17 a crucial role in MAT access [17]. Future research should address these gaps to provide a more  
18 comprehensive understanding of the determinants of access to MAT. Figures 2 and Supplemental  
19 Figure 1 provide overviews of the identified barriers and the TMFs used in the included studies,  
20 respectively. Although no single model can fully capture the complexity of MAT access, researchers  
21 and practitioners should consider the strengths and limitations of each TMF and select the most  
22 appropriate one(s) based on specific research questions and contexts.

23  
24 The insights from this review and the resulting integrated model have the potential to  
25 influence clinical practice and policymaking in line with the ethical imperatives outlined by the WHO  
26 and the UN [7,11]. These organisations have emphasised the necessity of AT to meet individual needs  
27 and enable equitable opportunities for people with disabilities. The synthesised theory aligns with the  
28 principles of access to AT as advocated by the WHO and UNICEF, highlighting the necessity for  
29 assistive products and services to be reachable, affordable, adaptable to individual needs and  
30 environments, culturally appropriate, and of high quality. By addressing the direct and indirect  
31 determinants of access, as identified in the theory, including service provision, policies, costs,  
32 personal preferences, and physical, social, and cultural factors, we can align better with these global  
33 principles [7]. These factors are important and have also been linked to the abandonment or  
34 discontinuance of using mobility products [65–67]. For example, difficult interactions between users  
35 and their products, as well as difficulties with the environment in which users live, could contribute to  
36 product discontinuance [65]. Therefore, this review proposes a theoretical basis for reforming the  
37 existing system to align it with international standards, thus addressing the pressing and unmet needs  
38 more equitably and personally to ensure successful access to and use of AT. To achieve this, future  
39 research must examine these determinants, understand the barriers to MAT provision, and plan and  
40 evaluate strategies to enhance its provision. Having a set of determinants organised around the CFIR  
41 [32] allows the creation of local implementation strategies to suit different policy jurisdictions.

42  
43 There is a consensus [68,69] and evidence-based approach [70] to overcome the barriers to  
44 effective AT provision found in this review. The barriers identified by the CFIR can be linked to  
45 Expert Recommendations for Implementing Change (ERIC) strategies [71]. These strategies guide the  
46 selection of implementation methods to mitigate barriers and include (1) activating local clinical  
47 leaders or champions, (2) providing educational materials, (3) organising meetings, and (4)  
48 implementing outreach or ongoing training. The implementation of these strategies can assist  
49 decision-makers in making informed choices regarding the selection of strategies for MAT provision.

## 50 51 52 53 54 55 56 57 58 **CONCLUSION**

1  
2  
3 The synthesised theory emphasises that mobility is a crucial aspect of human life and certain health  
4 conditions may restrict mobility. Providing comprehensive and appropriate services can reduce this  
5 impact; however, cost and policy decisions regarding these services affect their provision.  
6 Accessibility to these services is also affected by environmental and personal factors. This knowledge  
7 can be used to develop strategies to enhance provision.  
8  
9

## 10 **ACKNOWLEDGEMENTS**

11  
12  
13 The authors thank Louise Falzon of the School of Medicine and Population Health at the University  
14 of Sheffield. She provided invaluable assistance in refining our search strategy. We would also like to  
15 thank the University of Sheffield Institutional Open Access Fund for its funding towards the research.  
16 This work was previously presented at the 17th International Conference of the Association for the  
17 Advancement of Assistive Technology in Europe (AAATE 2023) held in Paris between 30 August  
18 and 1 September 2023.  
19  
20

## 21 **CONTRIBUTORS**

22  
23  
24  
25 All authors contributed to the conceptualisation and design of the study. Initial title and abstract  
26 screening were conducted by AA, with regular consultations with DH, SR, and BF. AA performed the  
27 data extraction independently, with regular discussions with DH, SR, and BF. The initial data  
28 synthesis was conducted by AA and refined by DH, SR, and BF. The manuscript was drafted by AA,  
29 and major revisions were made by DH, SR, and BF. All the authors (AA, DH, SR, and BF) have read  
30 and approved the final manuscript.  
31  
32

## 33 **FUNDING**

34  
35  
36  
37 This study received no specific grants from any funding agency in the public, commercial, or not-for-  
38 profit sectors.  
39

## 40 **COMPETING INTERESTS**

41  
42  
43 The authors report there are no competing interests to declare.  
44

## 45 **DATA AVAILABILITY STATEMENT**

46  
47  
48  
49 The authors confirm that the data supporting the findings of this study are available in the  
50 article and supplementary materials.  
51

## 52 **RIGHTS RETENTION STATEMENT**

53  
54  
55  
56  
57  
58 For the purpose of open access, the author has applied for a Creative Commons Attribution (CC BY)  
59 licence to any author-accepted manuscript version.  
60

## SUPPORTING MATERIALS

Supplemental Appendix 1, Checklist. Preferred Reporting Items for Systematic reviews and Meta-Analyses extension for Scoping Reviews (PRISMA-ScR)

Supplemental Appendix 2, Table. Systematic search conducted in MEDLINE, EMBASE, CINAHL, and SCOPUS

Supplemental Appendix 3, Table. Characteristics of included papers

Supplemental Appendix 4, Table. Propositions derived from the theories, models, and frameworks

Supplemental Appendix 5, Table. Gaps analysis

Supplemental Figure 1. Theories, models, frameworks, and their purpose of application in eligible studies

## ORCID iDs

Asma Aldawood, <https://orcid.org/0000-0003-4670-4348>

Daniel Hind, <https://orcid.org/0000-0002-6409-4793>

Simon Rushton, <https://orcid.org/0000-0003-1055-9871>

Becky Field, <https://orcid.org/0000-0003-3502-2691>

## Ethical Approval and Dissemination:

Ethical approval was not required for this scoping review. The dissemination plan includes publishing in peer-reviewed journals and presenting at academic conferences.

## REFERENCES

- 1 Shafrin J, Sullivan J, Goldman DP, *et al.* The association between observed mobility and quality of life in the near elderly. *PLoS One* 2017;**12**:e0182920. PMID: 28827806
- 2 Bechtold U, Stauder N, Fieder M. Let's Walk It: Mobility and the Perceived Quality of Life in Older Adults. *Int J Environ Res Public Health* 2021;**18**:11515. PMID: 34770028
- 3 Musich S, Wang SS, Ruiz J, *et al.* The impact of mobility limitations on health outcomes among older adults. *Geriatr Nurs.* 2018;**39**:162–9. PMID: 28866316
- 4 World Health Organization and World Bank. World report on disability. Geneva: *World Health Organization*; 2011. Available from: <https://www.who.int/publications/i/item/9789241564182>



- 1  
2  
3 5 van Hees SGM, van den Borne BHP, Menting J, *et al.* Patterns of social participation among  
4 older adults with disabilities and the relationship with well-being: A latent class analysis. *Arch*  
5 *Gerontol Geriatr* 2020;**86**:103933. PMID: 31542633.  
6  
7  
8 6 Achilike S, Beauchamp JES, Cron SG, *et al.* Caregiver Burden and Associated Factors among  
9 Informal Caregivers of Stroke Survivors. *Journal of Neuroscience Nursing* 2020;**52**:277–83.  
10 PMID: 33156591.  
11  
12 7 World Health Organization. Global report on assistive technology. Geneva: World Health  
13 Organization; 2022. Available from: <https://www.who.int/publications/i/item/9789240049451>  
14  
15 8 ISO 9999:2022; International Organization for Standardization Assistive Products—  
16 Classification and Terminology. ISO: Geneva, Switzerland, 2022  
17  
18 9 Hagberg L, Hermansson L, Fredriksson C, *et al.* Cost-effectiveness of powered mobility  
19 devices for elderly people with disability. *Disabil Rehabil Assist Technol* 2017;**12**:115–120.  
20 PMID: 25634493.  
21  
22 10 Frossard L, Ferrada L, Quincey T, *et al.* Cost-effectiveness of transtibial bone-anchored  
23 prostheses using osseointegrated fixation: From challenges to preliminary data. *Journal of*  
24 *Prosthetics and Orthotics* 2021;**33**:184–195. doi:10.1097/JPO.0000000000000372.  
25  
26 11 United Nations. United Nations Convention on the Rights of Persons with Disabilities. United  
27 Nations; 2007.  
28  
29 12 Danemayer J, Boggs D, Delgado Ramos V, *et al.* Estimating need and coverage for five  
30 priority assistive products: a systematic review of global population-based research. *BMJ Glob*  
31 *Health* 2022;**7**:e007662. PMID: 35101862.  
32  
33 13 Nilsen P. Making sense of implementation theories, models and frameworks. *Implement Sci.*  
34 2015;**10**:53. PMID: 25895742  
35  
36 14 Press C, Yon D, Heyes C. Building better theories. *Curr Biol.* 2022;**32**:R13–7. PMID:  
37 35015984  
38  
39 15 Levesque J-F, Harris MF, Russell G. Patient-centred access to health care: conceptualising  
40 access at the interface of health systems and populations. *Int J Equity Health* 2013;**12**:18.  
41 PMID: 23496984.  
42  
43 16 Nabizadeh S, Jalali M, Kamali M, *et al.* Barriers and facilitators of receiving prosthetic  
44 services in people with lower limb amputation during Covid-19 pandemic: A qualitative study  
45 in a developing country. *Prosthet Orthot Int.* 2023;1–10.  
46  
47 17 World Health Organization. International classification of functioning, disability and health:  
48 ICF. Geneva: WHO; 2001.  
49  
50 18 Fawcett J. An overview of conceptual models, theories, and research. In: Fawcett J, editor. *The*  
51 *relationship of theory and research*. 3rd ed. Philadelphia (PA): F.A. Davis Company; 1999. p.  
52 1–25.  
53  
54  
55  
56  
57  
58  
59  
60

- 1  
2  
3 19 Passey D. Theories, theoretical and conceptual frameworks, models and constructs: Limiting  
4 research outcomes through misconceptions and misunderstandings. *Studies in Technology*  
5 *Enhanced Learning*. 2020;1. doi: 10.21428/8C225F6E.56810A1A  
6  
7  
8 20 Cook A, Polgar J. Activity, human, and context: the human doing an activity in context. In:  
9 Cook A, Polgar J, editors. *Assistive technologies: principles and practice*. 4th ed. St. Louis  
10 (MO): Mosby; 2015. p. 40–67.  
11  
12 21 Smith RO. IMPACT2 Model. Rehabilitation Research Design and Disability Center. 2005.  
13 Available from: <https://uwm.edu/r2d2/methods/impact2-model/>.  
14  
15 22 Oskar K, Dennis P, Björn L, *et al*. Prescribers' experience of active wheelchair provisioning  
16 in Sweden: Analysis of a postal questionnaire. *Technol Disabil*. 2011;23:183–9. doi:  
17 10.3233/TAD-2011-0316  
18  
19 23 Gowran RJ, Bray N, Goldberg M, *et al*. Understanding the global challenges to accessing  
20 appropriate wheelchairs: Position paper. *Int J Environ Res Public Health* 2021;18:3338.  
21 PMID: 33804868.  
22  
23 24 Gregor S. The nature of theory in Information Systems. *MIS Q*. 2006;30:611–42.  
24 doi.org/10.2307/25148742  
25  
26 25 Gibson JJ. *The ecological approach to visual perception: classic edition*. New York and  
27 London: Psychology Press; 2014.  
28  
29 26 Denzin NK. *The Research Act: A Theoretical Introduction to Sociological Methods*. 1st ed.  
30 USA (New York): Transaction publishers; 2009. Chapter 12, Strategies of multiple  
31 triangulation; p. 234-247.  
32  
33 27 Khalil H, Tricco AC. Differentiating between mapping reviews and scoping reviews in the  
34 evidence synthesis ecosystem. *J Clin Epidemiol* 2022;149:175–182. PMID: 35636593.  
35  
36 28 Arksey H, O'Malley L. Scoping studies: towards a methodological framework. *Int J Soc Res*  
37 *Methodol* 2005;8:19–32. doi:10.1080/1364557032000119616.  
38  
39 29 Tricco AC, Lillie E, Zarin W, *et al*. PRISMA Extension for Scoping Reviews (PRISMA-ScR):  
40 Checklist and Explanation. *Ann Intern Med* 2018;169:467–473 PMID: 30178033.  
41  
42 30 Booth A, Carroll C. Systematic searching for theory to inform systematic reviews: is it  
43 feasible? Is it desirable? *Health Info Libr J* 2015;32:220–235. PMID: 26095232  
44  
45 31 Damschroder LJ, Aron DC, Keith RE, *et al*. Fostering implementation of health services  
46 research findings into practice: a consolidated framework for advancing implementation  
47 science. *Implement Sci* 2009;4:50. PMID: 19664226.  
48  
49 32 Damschroder LJ, Reardon CM, Widerquist MAO, *et al*. The updated Consolidated Framework  
50 for Implementation Research based on user feedback. *Implementation Science* 2022 17:1.  
51 2022;17:1–16. PMID: 36309746  
52  
53  
54  
55  
56  
57  
58  
59  
60

- 1  
2  
3 33 Keith RE, Crosson JC, O'Malley AS, *et al.* Using the Consolidated Framework for  
4 Implementation Research (CFIR) to produce actionable findings: a rapid-cycle evaluation  
5 approach to improving implementation. *Implement Sci* 2017;**12**:15. PMID: 28187747.  
6  
7  
8 34 Popay J, Roberts H, Sowden A, Petticrew M, Arai L, Rodgers M, *et al.* Guidance on the  
9 conduct of narrative synthesis in systematic reviews. Prod ESRC Methods Programme  
10 Version. 2006;1: b92. doi:10.13140/2.1.1018.4643.  
11  
12  
13 35 Pound P, Campbell R. Exploring the feasibility of theory synthesis: A worked example in the  
14 field of health related risk-taking. *Soc Sci Med* 2015;**124**:57–65. doi:10.1016/j.socscimed.  
15 PMID: 25461862.  
16  
17  
18 36 Turner JH. Developing Cumulative and Practical Knowledge through Metatheorizing.  
19 *Sociological Perspectives* 1991;**34**:249–268. doi:10.2307/1389510.  
20  
21  
22 37 Page MJ, McKenzie JE, Bossuyt PM, *et al.* The PRISMA 2020 statement: an updated  
23 guideline for reporting systematic reviews. *BMJ* 2021;**372**:n71 PMID: 33782057.  
24  
25  
26 38 Layton N. Barriers and Facilitators to Community Mobility for Assistive Technology Users.  
27 *Rehabil Res Pract* 2012;**2012**:1–9. PMID: 23029617.  
28  
29  
30 39 Hammel J, Southall K, Jutai J, *et al.* Evaluating use and outcomes of mobility technology: a  
31 multiple stakeholder analysis. *Disabil Rehabil Assist Technol* 2013;**8**:294–304. PMID:  
32 23137189.  
33  
34  
35 40 Dwyer K, Mulligan H. Community reintegration following spinal cord injury: Insights for  
36 health professionals in community rehabilitation services in New Zealand. *New Zealand*  
37 *Journal of Physiotherapy* 2015;**43**:75–85. doi:10.15619/NZJP/43.3.02.  
38  
39  
40 41 Steel EJ, Layton NA. Assistive Technology in Australia: Integrating theory and evidence into  
41 action. *Aust Occup Ther J* 2016;**63**:381–390. PMID: 27086661.  
42  
43  
44 42 Arthanat S, Elsaesser L-JJ, Bauer S. A survey of assistive technology service providers in the  
45 USA. *Disabil Rehabil Assist Technol* 2017;**12**:789–800. PMID: 28125297.  
46  
47  
48 43 Gonçalves E, Knabben J, Luz C. Portraying the amputation of lower limbs: an approach using  
49 ICF. *Fisioterapia em Movimento* 2017;**30**:97–106. doi:10.1590/1980-5918.030.001.a010.  
50  
51  
52 44 Mairami FF, Allotey P, Warren N, *et al.* Adaptive invention: independence and mobility  
53 through modifications. *Disabil Rehabil Assist Technol* 2018; **13**:658–664. PMID: 28836873.  
54  
55  
56 45 Widehammar C, Lidström Holmqvist K, Pettersson I, *et al.* Attitudes is the most important  
57 environmental factor for use of powered mobility devices—users' perspectives. *Scand J Occup*  
58 *Ther* 2020;**27**:298–308. PMID: 30856033.  
59  
60  
61 46 Jindal P, MacDermid J, Rosenbaum P, *et al.* Perspectives on rehabilitation of children with  
62 cerebral palsy: exploring a cross-cultural view of parents from India and Canada using the  
63 international classification of functioning, disability and health. *Disabil Rehabil*  
64 2018;**40**:2745–55. PMID: 28747138.

- 1  
2  
3 47 Seymour N, Geiger M, Scheffler E. Community-based rehabilitation workers' perspectives of  
4 wheelchair provision in Uganda: A qualitative study. *Afr J Disabil* 2019;**8**: 2226-7220. PMID:  
5 31061818.  
6  
7  
8 48 Dorjbal D, Prodinger B, Zanini C, *et al*. Living with spinal cord injury in Mongolia: A  
9 qualitative study on perceived environmental barriers. *J Spinal Cord Med* 2020;**43**:518–31.  
10 PMID: 30633693.  
11  
12 49 McIntyre J, Cleland K, Ramklass S. Access to wheelchairs by persons with mobility  
13 impairment in a remote rural district of KwaZulu-Natal, South Africa: therapists' perspectives.  
14 *Rural Remote Health* 2021;**21**:5855. PMID: 33478230.  
15  
16 50 Bhidayasiri R, Maytharakcheep S, Phumphid S, *et al*. Improving functional disability in  
17 patients with tremor: A clinical perspective of the efficacies, considerations, and challenges of  
18 assistive technology. *J Neurol Sci* 2022;**435**:120197.PMID: 35220112.  
19  
20 51 Serres-Lafontaine A de, Labbé D, Batcho CS, *et al*. Social participation of individuals with  
21 spinal injury using wheelchairs in rural Tanzania after peer training and entrepreneurial skills  
22 training. *Afr J Disabil* 2023;**12**. PMID: 36756462  
23  
24 52 Smith EM, Sakakibara BM, Miller WC. A review of factors influencing participation in social  
25 and community activities for wheelchair users. *Disabil Rehabil Assist Technol*. 2016;**11**:361–  
26 74. PMID: 25472004  
27  
28 53 World Engagement Institute. Sustainable Capacity—Systemic Development Model. 2012  
29 Available from: <http://www.weinstitute.org/methods.html>  
30  
31 54 Lenker JA, Paquet VL. A Review of Conceptual Models for Assistive Technology Outcomes  
32 Research and Practice. *Assistive Technology*. 2003;**15**:1–15.  
33  
34 55 de Jesus Alves AC, Matsukura TS. Theoretic models for recommendation and  
35 implementation of assistive technology 1. *Cadernos de Terapia Ocupacional da UFSCar*  
36 2016;**24**:591. doi:10.4322/0104-4931.ctoAO1078.  
37  
38 56 Lakatos I. Falsification and the Methodology of Scientific Research Programmes. In: *Lakatos*  
39 *I, Musgrave A, editors. Criticism and the Growth of Knowledge*. Cambridge: Cambridge  
40 University Press; 1970. p. 91–196  
41  
42 57 Long DM. Pragmatism, realism, and psychology: Understanding theory selection criteria. *J*  
43 *Contextual Behav Sci* 2013;**2**:61–7. doi:10.1016/J.JCBS.2013.09.003.  
44  
45 58 Satpute S, Cooper R, Dicianno BE, *et al*. Mini-review: Rehabilitation engineering: Research  
46 priorities and trends. *Neurosci Lett* 2021;**764**:136207. PMID: 34478814.  
47  
48 59 Best K, Smith E, Pellichero A, Sorita E, Archambault P, Kenyon L, *et al*. International  
49 research priorities on the role of cognition in power mobility device use: In pursuit of informed  
50 clinical practices and knowledge translation. *Assistive Technology*. 2021; **35**(2): 119-126.  
51  
52  
53  
54  
55  
56  
57  
58  
59  
60

- 1  
2  
3 60 Alqahtani S, Joseph J, Dicianno B, *et al.* Stakeholder perspectives on research and  
4 development priorities for mobility assistive-technology: a literature review. *Disabil Rehabil*  
5 *Assist Technol* 2021;**16**:362–76. PMID: 31535934.  
6  
7  
8 61 Fawcett J. Evaluating Conceptual-Theoretical-Empirical Structures for Research. In: Fawcett  
9 J. *The relationship of theory and research*. 3rd ed. Philadelphia: F.A. Davis Company; 1999.  
10 p.85-117.  
11  
12 62 Stern C, Kleijnen J. Language bias in systematic reviews: You only get out what you put in.  
13 *JBI Evid Synth* 2020;**18**:1818–9. doi:10.11124/JBIES-20-00361.  
14  
15 63 Zabala J. The SETT Framework: Critical Areas To Consider When Making Informed  
16 Assistive Technology Decisions. Paper presented at: 4th Florida Assistive Technology Impact  
17 Conference and Technology and Media Division of Council for Exceptional Children; 1995  
18 Mar 2-4; Orlando, FL. ERIC Number: ED381962. Available from:  
19 <https://eric.ed.gov/?id=ED381962>.  
20  
21  
22 64 Wisconsin Assistive Technology Initiatives. Assistive technology consideration. 2003.  
23 Available from: <https://www.wati.org/> [accessed 29 April 2024].  
24  
25 65 Lauer A, Longenecker Rust K, Smith RO. ATOMS Project technical report: factors in assistive  
26 technology device abandonment: replacing “abandonment” with “discontinuance”. ATOMS  
27 Project. 2006. Available from: [http://www.r2d2.uwm.edu/atoms/archive/technicalreports/tr-](http://www.r2d2.uwm.edu/atoms/archive/technicalreports/tr-discontinuance.html#fig1)  
28 [discontinuance.html#fig1](http://www.r2d2.uwm.edu/atoms/archive/technicalreports/tr-discontinuance.html#fig1)  
29  
30  
31 66 Sugawara AT, Ramos VD, Alfieri FM, *et al.* Abandonment of assistive products: assessing  
32 abandonment levels and factors that impact on it. *Disabil Rehabil Assist Technol*.  
33 2018;**13**:716–23.  
34  
35 67 Emmel MG, Manzini MG, Mendes P V. Assistive Technology Accessibility and  
36 Abandonment: Challenges for Occupational Therapists. *Open J Occup Ther*. 2016;**4**. doi:  
37 10.15453/2168-6408.1166.  
38  
39 68 Powell BJ, McMillen JC, Proctor EK, *et al.* A Compilation of Strategies for Implementing  
40 Clinical Innovations in Health and Mental Health. *Medical Care Research and Review*  
41 2012;**69**:123–57. PMID: 22203646.  
42  
43 69 Powell BJ, Waltz TJ, Chinman MJ, *et al.* A refined compilation of implementation strategies:  
44 Results from the Expert Recommendations for Implementing Change (ERIC) project.  
45 *Implementation Science* 2015;**10**:1–14. PMID: 25889199.  
46  
47 70 Powell BJ, Fernandez ME, Williams NJ, *et al.* Enhancing the Impact of Implementation  
48 Strategies in Healthcare: A Research Agenda. *Front Public Health* 2019;**7**. PMID: 30723713  
49  
50 71 Waltz TJ, Powell BJ, Fernández ME, *et al.* Choosing implementation strategies to address  
51 contextual barriers: Diversity in recommendations and future directions. *Implementation*  
52 *Science* 2019;**14**:1–15. PMID: 31036028.  
53  
54  
55  
56  
57  
58  
59  
60

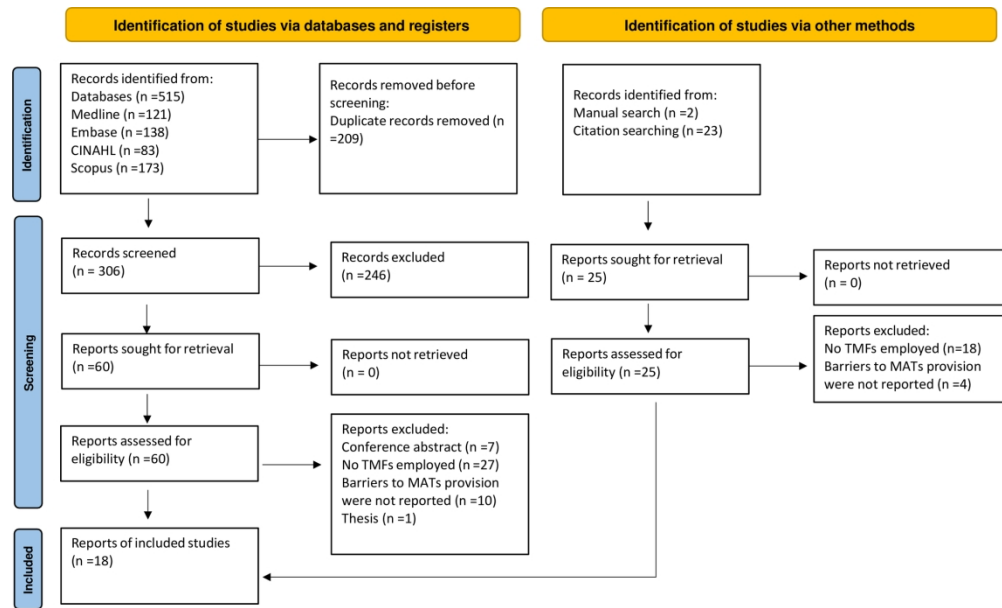

PRISMA flow diagram

190x114mm (300 x 300 DPI)



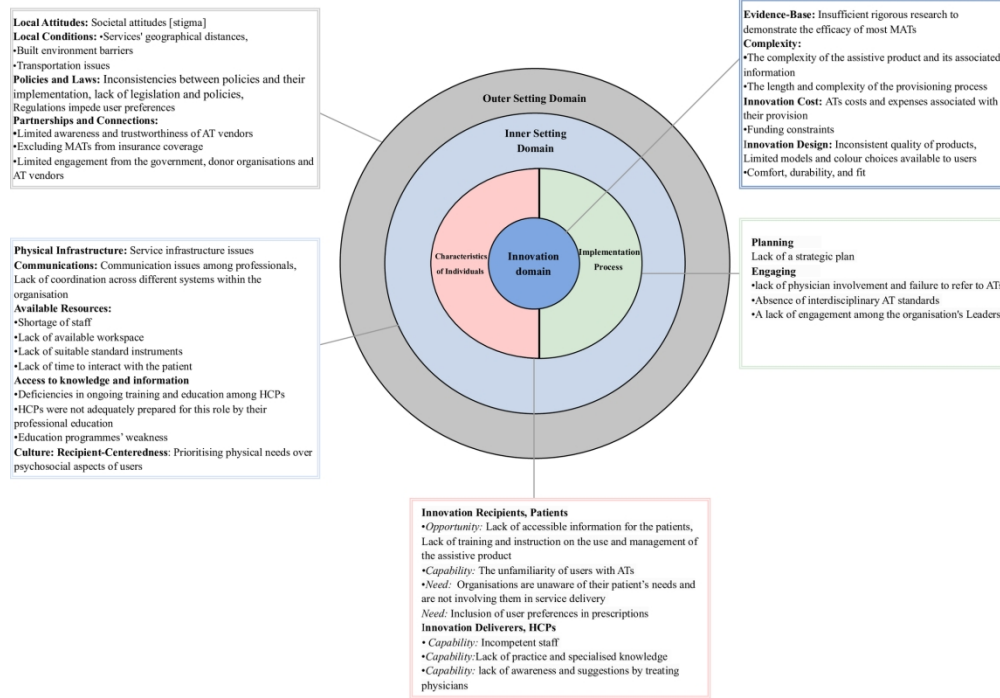

Barriers to the provision of MATs synthesised using the CFIR

190x133mm (300 x 300 DPI)

1  
2  
3  
4  
5  
6  
7  
8  
9  
10  
11  
12  
13  
14  
15  
16  
17  
18  
19  
20  
21  
22  
23  
24  
25  
26  
27  
28  
29  
30  
31  
32  
33  
34  
35  
36  
37  
38  
39  
40  
41  
42  
43  
44  
45  
46  
47  
48  
49  
50  
51  
52  
53  
54  
55  
56  
57  
58  
59  
60



Synthetic model

190x74mm (300 x 300 DPI)





Theories, models and frameworks to understand barriers to the provision of mobility assistive technologies: A scoping review

Appendix 1. Preferred Reporting Items for Systematic reviews and Meta-Analyses extension for Scoping Reviews (PRISMA-ScR) Checklist

| SECTION                           | ITEM | PRISMA-ScR CHECKLIST ITEM                                                                                                                                                                                                                                                                                  | REPORTED ON PAGE #  |
|-----------------------------------|------|------------------------------------------------------------------------------------------------------------------------------------------------------------------------------------------------------------------------------------------------------------------------------------------------------------|---------------------|
| <b>TITLE</b>                      |      |                                                                                                                                                                                                                                                                                                            |                     |
| Title                             | 1    | Identify the report as a scoping review.                                                                                                                                                                                                                                                                   | #1                  |
| <b>ABSTRACT</b>                   |      |                                                                                                                                                                                                                                                                                                            |                     |
| Structured summary                | 2    | Provide a structured summary that includes (as applicable): background, objectives, eligibility criteria, sources of evidence, charting methods, results, and conclusions that relate to the review questions and objectives.                                                                              | #2                  |
| <b>INTRODUCTION</b>               |      |                                                                                                                                                                                                                                                                                                            |                     |
| Rationale                         | 3    | Describe the rationale for the review in the context of what is already known. Explain why the review questions/objectives lend themselves to a scoping review approach.                                                                                                                                   | #4-5                |
| Objectives                        | 4    | Provide an explicit statement of the questions and objectives being addressed with reference to their key elements (e.g., population or participants, concepts, and context) or other relevant key elements used to conceptualize the review questions and/or objectives.                                  | #5                  |
| <b>METHODS</b>                    |      |                                                                                                                                                                                                                                                                                                            |                     |
| Protocol and registration         | 5    | Indicate whether a review protocol exists; state if and where it can be accessed (e.g., a Web address); and if available, provide registration information, including the registration number.                                                                                                             | #5 (not registered) |
| Eligibility criteria              | 6    | Specify characteristics of the sources of evidence used as eligibility criteria (e.g., years considered, language, and publication status), and provide a rationale.                                                                                                                                       | #5-6                |
| Information sources*              | 7    | Describe all information sources in the search (e.g., databases with dates of coverage and contact with authors to identify additional sources), as well as the date the most recent search was executed.                                                                                                  | #6                  |
| Search                            | 8    | Present the full electronic search strategy for at least 1 database, including any limits used, such that it could be repeated.                                                                                                                                                                            | Appendix 2          |
| Selection of sources of evidence† | 9    | State the process for selecting sources of evidence (i.e., screening and eligibility) included in the scoping review.                                                                                                                                                                                      | #6                  |
| Data charting process‡            | 10   | Describe the methods of charting data from the included sources of evidence (e.g., calibrated forms or forms that have been tested by the team before their use, and whether data charting was done independently or in duplicate) and any processes for obtaining and confirming data from investigators. | #7                  |
| Data items                        | 11   | List and define all variables for which data were sought and any assumptions and simplifications made.                                                                                                                                                                                                     | #7                  |

Theories, models and frameworks to understand barriers to the provision of mobility assistive technologies: A scoping review

| SECTION                                                           | ITEM | PRISMA-ScR CHECKLIST ITEM                                                                                                                                                                             | REPORTED ON PAGE #                                |
|-------------------------------------------------------------------|------|-------------------------------------------------------------------------------------------------------------------------------------------------------------------------------------------------------|---------------------------------------------------|
| Critical appraisal of individual sources of evidence <sup>§</sup> | 12   | If done, provide a rationale for conducting a critical appraisal of included sources of evidence; describe the methods used and how this information was used in any data synthesis (if appropriate). | NA                                                |
| Synthesis of results                                              | 13   | Describe the methods of handling and summarizing the data that were charted.                                                                                                                          | #7                                                |
| <b>RESULTS</b>                                                    |      |                                                                                                                                                                                                       |                                                   |
| Selection of sources of evidence                                  | 14   | Give numbers of sources of evidence screened, assessed for eligibility, and included in the review, with reasons for exclusions at each stage, ideally using a flow diagram.                          | #8                                                |
| Characteristics of sources of evidence                            | 15   | For each source of evidence, present characteristics for which data were charted and provide the citations.                                                                                           | #8 and Appendix 3                                 |
| Critical appraisal within sources of evidence                     | 16   | If done, present data on critical appraisal of included sources of evidence (see item 12).                                                                                                            | NA                                                |
| Results of individual sources of evidence                         | 17   | For each included source of evidence, present the relevant data that were charted that relate to the review questions and objectives.                                                                 | #8-9, Figure 2, Supplemental Figure 1, Appendix 3 |
| Synthesis of results                                              | 18   | Summarize and/or present the charting results as they relate to the review questions and objectives.                                                                                                  | #8-12                                             |
| <b>DISCUSSION</b>                                                 |      |                                                                                                                                                                                                       |                                                   |
| Summary of evidence                                               | 19   | Summarize the main results (including an overview of concepts, themes, and types of evidence available), link to the review questions and objectives, and consider the relevance to key groups.       | #13                                               |
| Limitations                                                       | 20   | Discuss the limitations of the scoping review process.                                                                                                                                                | #13                                               |
| Conclusions                                                       | 21   | Provide a general interpretation of the results with respect to the review questions and objectives, as well as potential implications and/or next steps.                                             | #14                                               |
| <b>FUNDING</b>                                                    |      |                                                                                                                                                                                                       |                                                   |
| Funding                                                           | 22   | Describe sources of funding for the included sources of evidence, as well as sources of funding for the scoping review. Describe the role of the funders of the scoping review.                       | #15                                               |

JBI = Joanna Briggs Institute; PRISMA-ScR = Preferred Reporting Items for Systematic reviews and Meta-Analyses extension for Scoping Reviews.

\* Where *sources of evidence* (see second footnote) are compiled from, such as bibliographic databases, social media platforms, and Web sites.

† A more inclusive/heterogeneous term used to account for the different types of evidence or data sources (e.g., quantitative and/or qualitative research, expert opinion, and policy documents) that may be eligible in a scoping review as opposed to only studies. This is not to be confused with *information sources* (see first footnote).

‡ The frameworks by Arksey and O'Malley (6) and Levac and colleagues (7) and the JBI guidance (4, 5) refer to the process of data extraction in a scoping review as data charting.

§ The process of systematically examining research evidence to assess its validity, results, and relevance before using it to inform a decision. This term is used for items 12 and 19 instead of "risk of bias" (which is more

Theories, models and frameworks to understand barriers to the provision of mobility assistive technologies: A scoping review

applicable to systematic reviews of interventions) to include and acknowledge the various sources of evidence that may be used in a scoping review (e.g., quantitative and/or qualitative research, expert opinion, and policy document).

*From:* Tricco AC, Lillie E, Zarin W, O'Brien KK, Colquhoun H, Levac D, et al. PRISMA Extension for Scoping Reviews (PRISMA ScR): Checklist and Explanation. *Ann Intern Med.* 2018;169:467–473. [doi: 10.7326/M18-0850](https://doi.org/10.7326/M18-0850)

For peer review only

## Appendix 2. Systematic search conducted in MEDLINE, EMBASE and CINAHL, SCOPUS

Database(s): Ovid MEDLINE(R) Search Strategy:

| #  | Query                                                                                                              | Results from 29 Apr 2024 |
|----|--------------------------------------------------------------------------------------------------------------------|--------------------------|
| 1  | (Access* adj10 (barrier* or challeng* or restrict* or obstacle* or impediment* or difficult* or issue*)).ab,ti.    | 66,790                   |
| 2  | (Provision* adj10 (barrier* or challeng* or restrict* or obstacle* or impediment* or difficult* or issue*)).ab,ti. | 8,055                    |
| 3  | (Provide* adj10 (barrier* or challeng* or restrict* or obstacle* or impediment* or difficult* or issue*)).ab,ti.   | 106,675                  |
| 4  | (Adoption* adj10 (barrier* or challeng* or restrict* or obstacle* or impediment* or difficult* or issue*)).ab,ti.  | 7,844                    |
| 5  | Wheelchairs/                                                                                                       | 5,537                    |
| 6  | Orthotic Devices/                                                                                                  | 7,015                    |
| 7  | Exoskeleton Device/                                                                                                | 1,640                    |
| 8  | Mobility device*.ab,ti.                                                                                            | 545                      |
| 9  | Mobility technolog*.ab,ti.                                                                                         | 55                       |
| 10 | Wheelchair*.ab,ti.                                                                                                 | 8,976                    |
| 11 | Scooter*.ab,ti.                                                                                                    | 865                      |
| 12 | Walker*.ab,ti.                                                                                                     | 15,558                   |
| 13 | Prosthetic*.ab,ti.                                                                                                 | 64,965                   |
| 14 | prosthesis/                                                                                                        | 50,410                   |
| 15 | orthotic*.ab,ti.                                                                                                   | 3,776                    |
| 16 | Self-Help Devices/                                                                                                 | 5,878                    |
| 17 | Exoskeleton*.ab,ti.                                                                                                | 4,856                    |
| 18 | Orthos*.ab,ti.                                                                                                     | 26,556                   |
| 19 | power mobility.ab,ti.                                                                                              | 135                      |
| 20 | Prosthe* device*.ab,ti.                                                                                            | 2,437                    |
| 21 | (Assistive technolog* adj10 mobility).ab,ti.                                                                       | 137                      |
| 22 | (Assistive device* adj10 mobility).ab,ti.                                                                          | 217                      |
| 23 | assistive product*.ab,ti.                                                                                          | 114                      |
| 24 | mobility product*.ab,ti.                                                                                           | 24                       |
| 25 | Disabled Persons/                                                                                                  | 48,730                   |
| 26 | Mobility Limitation/                                                                                               | 5,333                    |
| 27 | Elder*.ti,ab.                                                                                                      | 312,960                  |
| 28 | Physical* Disable*.ab,ti.                                                                                          | 951                      |
| 29 | Disable*.ab,ti.                                                                                                    | 29,789                   |
| 30 | Disabilit*.ab,ti.                                                                                                  | 253,216                  |
| 31 | Walking difficult*.ab,ti.                                                                                          | 697                      |
| 32 | Handicap*.ab,ti.                                                                                                   | 26,114                   |
| 33 | physical* impair*.ab,ti.                                                                                           | 3,224                    |
| 34 | physical* Challeng*.ab,ti.                                                                                         | 714                      |
| 35 | Ambulat* Difficult*.ab,ti.                                                                                         | 90                       |
| 36 | Mobility difficult*.ab,ti.                                                                                         | 255                      |

|    |                                                                                                                 |            |
|----|-----------------------------------------------------------------------------------------------------------------|------------|
| 37 | Mobility impair*.ab,ti.                                                                                         | 1,413      |
| 38 | Mobility limit*.ab,ti.                                                                                          | 1,503      |
| 39 | Amput*.ab,ti.                                                                                                   | 54,578     |
| 40 | Motor difficult*.ab,ti.                                                                                         | 553        |
| 41 | Amputation/                                                                                                     | 24,235     |
| 42 | Geriatrics/                                                                                                     | 31,638     |
| 43 | (theor* or framework* or model* or taxonom* or classifi* or concept*).ab,ti.                                    | 5,908,724  |
| 44 | (Matching Person and Technology).ab,ti.                                                                         | 22         |
| 45 | ("abandonment" or "discontinuance") and "model").ab,ti.                                                         | 665        |
| 46 | ("SETT " or "Student Environment Tasks Tools").ab,ti.                                                           | 92         |
| 47 | ("WATI" or "Wisconsin Assistive Technology Initiative").ab,ti.                                                  | 21         |
| 48 | ("ATOMS" or "Assistive Technology Outcomes Measurement System").ab,ti.                                          | 113,166    |
| 49 | 1 or 2 or 3 or 4                                                                                                | 181,073    |
| 50 | 25 or 26 or 27 or 28 or 29 or 30 or 31 or 32 or 33 or 34 or 35 or 36 or 37 or 38 or 39 or 40 or 41 or 42        | 703,079    |
| 51 | 5 or 6 or 7 or 8 or 9 or 10 or 11 or 12 or 13 or 14 or 15 or 16 or 17 or 18 or 19 or 20 or 21 or 22 or 23 or 24 | 179,179    |
| 52 | 43 or 44 or 45 or 46 or 47 or 48                                                                                | 5,978,819  |
| 53 | 49 and 50 and 51 and 52                                                                                         | 129        |
| 54 | limit 53 to english language                                                                                    | 123        |
| 55 | limit 54 to dt=20000101-20240320                                                                                | <b>121</b> |
| 56 | limit 55 to dt=20230615-20240320                                                                                | 7          |
| 57 | 45 or 46 or 47 or 48                                                                                            | 113,944    |
| 58 | 49 and 50 and 51 and 57                                                                                         | 1          |

Database(s): **Ovid Embase** Search Strategy:

| #  | Query                                                                                                              | Results from 29 Apr 2024 |
|----|--------------------------------------------------------------------------------------------------------------------|--------------------------|
| 1  | (Access* adj10 (barrier* or challeng* or restrict* or obstacle* or impediment* or difficult* or issue*)).ab,ti.    | 90,641                   |
| 2  | (Provision* adj10 (barrier* or challeng* or restrict* or obstacle* or impediment* or difficult* or issue*)).ab,ti. | 10,610                   |
| 3  | (Provide* adj10 (barrier* or challeng* or restrict* or obstacle* or impediment* or difficult* or issue*)).ab,ti.   | 133,811                  |
| 4  | (Adoption* adj10 (barrier* or challeng* or restrict* or obstacle* or impediment* or difficult* or issue*)).ab,ti.  | 9,176                    |
| 5  | Wheelchairs/                                                                                                       | 11,508                   |
| 6  | Orthotic Devices/                                                                                                  | 7,508                    |
| 7  | Exoskeleton Device/                                                                                                | 1,477                    |
| 8  | Mobility device*.ab,ti.                                                                                            | 661                      |
| 9  | Mobility technolog*.ab,ti.                                                                                         | 63                       |
| 10 | Wheelchair*.ab,ti.                                                                                                 | 13,489                   |
| 11 | Scooter*.ab,ti.                                                                                                    | 1,053                    |
| 12 | Walker*.ab,ti.                                                                                                     | 18,160                   |
| 13 | Prosthetic*.ab,ti.                                                                                                 | 77,740                   |
| 14 | prosthesis/                                                                                                        | 34,227                   |
| 15 | orthotic*.ab,ti.                                                                                                   | 5,449                    |
| 16 | Self-Help Devices/                                                                                                 | 3,100                    |
| 17 | Exoskeleton*.ab,ti.                                                                                                | 5,373                    |
| 18 | Orthos*.ab,ti.                                                                                                     | 36,813                   |
| 19 | power mobility.ab,ti.                                                                                              | 165                      |
| 20 | Prosthe* device*.ab,ti.                                                                                            | 2,852                    |
| 21 | (Assistive technolog* adj10 mobility).ab,ti.                                                                       | 170                      |
| 22 | (Assistive device* adj10 mobility).ab,ti.                                                                          | 311                      |
| 23 | assistive product*.ab,ti.                                                                                          | 123                      |
| 24 | mobility product*.ab,ti.                                                                                           | 24                       |
| 25 | Disabled Persons/                                                                                                  | 31,998                   |
| 26 | Mobility Limitation/                                                                                               | 15,084                   |
| 27 | Elder*.ti,ab.                                                                                                      | 443,632                  |
| 28 | Physical* Disable*.ab,ti.                                                                                          | 1,219                    |
| 29 | Disable*.ab,ti.                                                                                                    | 38,656                   |
| 30 | Disabilit*.ab,ti.                                                                                                  | 357,400                  |
| 31 | Walking difficult*.ab,ti.                                                                                          | 1,272                    |
| 32 | Handicap*.ab,ti.                                                                                                   | 31,880                   |
| 33 | physical* impair*.ab,ti.                                                                                           | 4,567                    |
| 34 | physical* Challeng*.ab,ti.                                                                                         | 982                      |
| 35 | Ambulat* Difficult*.ab,ti.                                                                                         | 136                      |
| 36 | Mobility difficult*.ab,ti.                                                                                         | 350                      |
| 37 | Mobility impair*.ab,ti.                                                                                            | 1,873                    |
| 38 | Mobility limit*.ab,ti.                                                                                             | 1,986                    |
| 39 | Amput*.ab,ti.                                                                                                      | 68,468                   |
| 40 | Motor difficult*.ab,ti.                                                                                            | 767                      |
| 41 | Amputation/                                                                                                        | 27,148                   |
| 42 | Geriatrics/                                                                                                        | 34,606                   |

|    |                                                                                                                 |            |
|----|-----------------------------------------------------------------------------------------------------------------|------------|
| 43 | (theor* or framework* or model* or taxonom* or classifi* or concept*).ab,ti.                                    | 7,279,458  |
| 44 | (Matching Person and Technology).ab,ti.                                                                         | 32         |
| 45 | (("abandonment" or "discontinuance") and "model").ab,ti.                                                        | 827        |
| 46 | ("SETT " or "Student Environment Tasks Tools").ab,ti.                                                           | 156        |
| 47 | ("WATI" or "Wisconsin Assistive Technology Initiative").ab,ti.                                                  | 45         |
| 48 | ("ATOMS" or "Assistive Technology Outcomes Measurement System").ab,ti.                                          | 80,470     |
| 49 | 1 or 2 or 3 or 4                                                                                                | 233,091    |
| 50 | 25 or 26 or 27 or 28 or 29 or 30 or 31 or 32 or 33 or 34 or 35 or 36 or 37 or 38 or 39 or 40 or 41 or 42        | 958,285    |
| 51 | 5 or 6 or 7 or 8 or 9 or 10 or 11 or 12 or 13 or 14 or 15 or 16 or 17 or 18 or 19 or 20 or 21 or 22 or 23 or 24 | 189,829    |
| 52 | 43 or 44 or 45 or 46 or 47 or 48                                                                                | 7,328,459  |
| 53 | 49 and 50 and 51 and 52                                                                                         | 143        |
| 54 | limit 53 to english language                                                                                    | 140        |
| 55 | limit 54 to dc=20000101-20240320                                                                                | <b>138</b> |
| 56 | limit 55 to dc=20230615-20240320                                                                                | 10         |
| 57 | 45 or 46 or 47 or 48                                                                                            | 81,498     |
| 58 | 49 and 50 and 51 and 57                                                                                         | 0          |



## Database(s): EBSCO CINAHL Search Strategy:

| #   | Query                                                                                                                                                    | Results from<br>29 Apr 2024 |
|-----|----------------------------------------------------------------------------------------------------------------------------------------------------------|-----------------------------|
| S58 | S49 AND S50 AND S51 AND S57                                                                                                                              | 0                           |
| S57 | S45 OR S46 OR S47 OR S48                                                                                                                                 | 587                         |
| S56 | (S54 AND EM 20230620-20240320) AND (S45 OR S46 OR S47 OR S48)                                                                                            | 0                           |
| S55 | S54 AND EM 20230620-20240320                                                                                                                             | 4                           |
| S54 | S53 AND EM 20000101-20240320                                                                                                                             | 83                          |
| S53 | (S43 OR S44 OR S45 OR S46 OR S47 OR S48) AND (S49 AND S50 AND S51 AND S52) Limiters - Language: English                                                  | 87                          |
| S52 | S43 OR S44 OR S45 OR S46 OR S47 OR S48                                                                                                                   | 1,068,868                   |
| S51 | S25 OR S26 OR S27 OR S28 OR S29 OR S30 OR S31 OR S32 OR S33 OR S34 OR S35 OR S36 OR S37 OR S38 OR S39 OR S40 OR S41 OR S42                               | 295,657                     |
| S50 | S5 OR S6 OR S7 OR S8 OR S9 OR S10 OR S11 OR S12 OR S13 OR S14 OR S15 OR S16 OR S17 OR S18 OR S19 OR S20 OR S21 OR S22 OR S23 OR S24                      | 42,403                      |
| S49 | S1 OR S2 OR S3 OR S4                                                                                                                                     | 73,674                      |
| S48 | (TI " ATOMS " OR AB " ATOMS " OR TI " Assistive Technology Outcomes Measurement System" OR AB " Assistive Technology Outcomes Measurement System")       | 325                         |
| S47 | (TI " WATI " OR AB " WATI " OR TI " Wisconsin Assistive Technology Initiative" OR AB " Wisconsin Assistive Technology Initiative")                       | 13                          |
| S46 | (TI "SETT" OR AB "SETT" OR TI "Student Environment Tasks Tools" OR AB "Student Environment Tasks Tools")                                                 | 42                          |
| S45 | TI (("abandonment" or "discontinuance") and "model") OR AB (("abandonment" or "discontinuance") and "model")                                             | 207                         |
| S44 | TI "Matching Person and Technology" OR AB "Matching Person and Technology"                                                                               | 23                          |
| S43 | TI ( theor* OR framework* OR model* OR taxonom* OR classifi* OR concept* ) OR AB ( theor* OR framework* OR model* OR taxonom* OR classifi* OR concept* ) | 1,068,584                   |
| S42 | (MH "Geriatrics")                                                                                                                                        | 6,059                       |
| S41 | (MH "Amputation")                                                                                                                                        | 7,629                       |
| S40 | TI "Motor difficult*" OR AB "Motor difficult*"                                                                                                           | 246                         |
| S39 | TI Amput* OR AB Amput*                                                                                                                                   | 15,087                      |
| S38 | TI "Mobility limit*" OR AB "Mobility limit*"                                                                                                             | 973                         |
| S37 | TI "Mobility impair*" OR AB "Mobility impair*"                                                                                                           | 802                         |
| S36 | TI "Mobility difficult*" OR AB "Mobility difficult*"                                                                                                     | 162                         |
| S35 | TI "Ambulat* Difficult*" OR AB "Ambulat* Difficult*"                                                                                                     | 25                          |
| S34 | TI "physical* Challeng*" OR AB "physical* Challeng*"                                                                                                     | 389                         |
| S33 | TI "physical* impair*" OR AB "physical* impair*"                                                                                                         | 1,734                       |
| S32 | TI Handicap* OR AB Handicap*                                                                                                                             | 6,460                       |
| S31 | TI "Walking difficult*" OR AB "Walking difficult*"                                                                                                       | 238                         |
| S30 | TI Disabilit* OR AB Disabilit*                                                                                                                           | 128,095                     |
| S29 | TI Disable* OR AB Disable*                                                                                                                               | 12,965                      |
| S28 | TI "Physical* Disable*" OR AB "Physical* Disable*"                                                                                                       | 711                         |
| S27 | TI Elder* OR AB Elder*                                                                                                                                   | 114,587                     |
| S26 | (MH "Physical Mobility")                                                                                                                                 | 7,823                       |
| S25 | (MH "Persons with Disabilities")                                                                                                                         | 37,595                      |
| S24 | TI "mobility product*" OR AB "mobility product*"                                                                                                         | 6                           |
| S23 | TI "assistive product*" OR AB "assistive product*"                                                                                                       | 69                          |

|     |                                                                                                                                                                                                                                      |        |
|-----|--------------------------------------------------------------------------------------------------------------------------------------------------------------------------------------------------------------------------------------|--------|
| S22 | TI ("Assistive device*" n10 mobility) OR AB ("Assistive device*" n10 mobility)                                                                                                                                                       | 157    |
| S21 | TI ("Assistive technolog*" n10 mobility) OR AB ("Assistive technolog*" n10 mobility)                                                                                                                                                 | 131    |
| S20 | TI "Prosthet* device*" OR AB "Prosthet* device*"                                                                                                                                                                                     | 406    |
| S19 | TI "power mobility" OR AB "power mobility"                                                                                                                                                                                           | 136    |
| S18 | TI Orthose* OR AB Orthose*                                                                                                                                                                                                           | 2,498  |
| S17 | TI Exoskeleton* OR AB Exoskeleton*                                                                                                                                                                                                   | 813    |
| S16 | (MH "Assistive Technology Devices")                                                                                                                                                                                                  | 6,771  |
| S15 | TI orthotic* OR AB orthotic*                                                                                                                                                                                                         | 2,702  |
| S14 | (MH "Limb Prosthesis")                                                                                                                                                                                                               | 3,007  |
| S13 | TI Prosthetic* OR AB Prosthetic*                                                                                                                                                                                                     | 12,814 |
| S12 | TI Walker* OR AB Walker*                                                                                                                                                                                                             | 3,878  |
| S11 | TI Scooter* OR AB Scooter*                                                                                                                                                                                                           | 453    |
| S10 | TI Wheelchair* OR AB Wheelchair*                                                                                                                                                                                                     | 5,824  |
| S9  | TI "Mobility technolog*" OR AB "Mobility technolog*"                                                                                                                                                                                 | 40     |
| S8  | TI ("Mobility device*") OR AB ("Mobility device*")                                                                                                                                                                                   | 428    |
| S7  | (MH "Exoskeleton Devices")                                                                                                                                                                                                           | 347    |
| S6  | (MH "Orthoses")                                                                                                                                                                                                                      | 7,176  |
| S5  | (MH "Wheelchairs")                                                                                                                                                                                                                   | 5,140  |
| S4  | TI ( (Adoption* n10 (barrier* or challeng* or restrict* or obstacle* or impediment* or difficult* or issue*)) ) OR AB ( (Adoption* n10 (barrier* or challeng* or restrict* or obstacle* or impediment* or difficult* or issue*)) )   | 3,272  |
| S3  | TI ( Provide* n10 (barrier* or challeng* or restrict* or obstacle* or impediment* or difficult* or issue*)) ) OR AB ( Provide* n10 (barrier* or challeng* or restrict* or obstacle* or impediment* or difficult* or issue*)) )       | 40,826 |
| S2  | TI ( (Provision* n10 (barrier* or challeng* or restrict* or obstacle* or impediment* or difficult* or issue*)) ) OR AB ( (Provision* n10 (barrier* or challeng* or restrict* or obstacle* or impediment* or difficult* or issue*)) ) | 5,221  |
| S1  | TI ( (Access* n10 (barrier* or challeng* or restrict* or obstacle* or impediment* or difficult* or issue*)) ) OR AB ( (Access* n10 (barrier* or challeng* or restrict* or obstacle* or impediment* or difficult* or issue*)) )       | 29,525 |

Database(s): **Scopus** Search Strategy:

```
(( ( TITLE-ABS ( access* W/10 ( barrier* OR challeng* OR restrict* OR obstacle* OR impediment* OR
difficult* OR issue* ) ) ) ) OR ( ( TITLE-ABS ( provision* W/10 ( barrier* OR challeng* OR restrict* OR
obstacle* OR impediment* OR difficult* OR issue* ) ) ) ) OR ( ( TITLE-ABS ( provide* W/10 ( barrier*
OR challeng* OR restrict* OR obstacle* OR impediment* OR difficult* OR issue* ) ) ) ) OR ( ( TITLE-ABS
( adoption* W/10 ( barrier* OR challeng* OR restrict* OR obstacle* OR impediment* OR difficult* OR
issue* ) ) ) ) ) AND ( TITLE-ABS ( "Disabled Person*" OR "Mobility* Limitation*" OR elder* OR
"Physically Disabled" OR disable* OR disabilit* OR "Walking difficult*" OR handicap* OR "physically
impair*" OR "Physically Challeng*" OR "Ambulat* difficult*" OR "Mobility difficult*" OR "Mobility
impair*" OR "Mobility limit*" OR "Amput*" OR "Motor difficult*" OR amputation* ) ) AND ( TITLE-ABS
( theor* OR framework* OR model* OR taxonom* OR classifi* OR concept* OR "Matching Person and
Technology" OR ( abandonment OR discontinuance AND model ) ) ) AND ( TITLE-ABS ( wheelchair* OR
"power mobility*" OR "Mobility device*" OR "Mobility technolog*" OR ( "Assistive technolog*" W/10
mobility ) OR ( "Assistive device*" W/10 mobility ) OR orthotic* OR exoskeleton* OR scooter* OR
walker* OR prosthet* OR orthos* OR prosthetic* OR "Prosthe* device*" OR orthotic* OR "mobility
product*" OR "assistive product*" ) ) AND PUBYEAR > 1999 AND PUBYEAR < 2025 AND ( LIMIT-TO (
LANGUAGE , "English" ) ) ) 173 documents
```

```
(( ( TITLE-ABS ( access* W/10 ( barrier* OR challeng* OR restrict* OR obstacle* OR impediment* OR
difficult* OR issue* ) ) ) ) OR ( ( TITLE-ABS ( provision* W/10 ( barrier* OR challeng* OR restrict* OR
obstacle* OR impediment* OR difficult* OR issue* ) ) ) ) OR ( ( TITLE-ABS ( provide* W/10 ( barrier*
OR challeng* OR restrict* OR obstacle* OR impediment* OR difficult* OR issue* ) ) ) ) OR ( ( TITLE-ABS
( adoption* W/10 ( barrier* OR challeng* OR restrict* OR obstacle* OR impediment* OR difficult* OR
issue* ) ) ) ) ) AND ( TITLE-ABS ( "Disabled Person*" OR "Mobility* Limitation*" OR elder* OR
"Physically Disabled" OR disable* OR disabilit* OR "Walking difficult*" OR handicap* OR "physically
impair*" OR "Physically Challeng*" OR "Ambulat* difficult*" OR "Mobility difficult*" OR "Mobility
impair*" OR "Mobility limit*" OR "Amput*" OR "Motor difficult*" OR amputation* ) ) AND (TITLE-ABS
("sett" OR "student environment tasks tools" OR "wati" OR "Wisconsin assistive technology initiative"
OR "atoms" OR "assistive technology outcomes measurement system" OR ("abandonment" OR
"discontinuance" AND "model" ) ) ) AND ( TITLE-ABS ( wheelchair* OR "power mobility*" OR "Mobility
device*" OR "Mobility technolog*" OR ( "Assistive technolog*" W/10 mobility ) OR ( "Assistive
device*" W/10 mobility ) OR orthotic* OR exoskeleton* OR scooter* OR walker* OR prosthet* OR
orthos* OR prosthetic* OR "Prosthe* device*" OR orthotic* OR "mobility product*" OR "assistive
product*" ) ) AND PUBYEAR > 1999 AND PUBYEAR < 2025 AND ( LIMIT-TO ( LANGUAGE , "English" ) ) )
```

Theories, models and frameworks to understand barriers to the provision of mobility assistive technologies: A scoping review

Appendix 3, Table. Characteristics of included papers

| Authors and Year                           | Study design                            | Aims of the study                                                                                                          | Population (n, characteristics)                      | Country                                 |
|--------------------------------------------|-----------------------------------------|----------------------------------------------------------------------------------------------------------------------------|------------------------------------------------------|-----------------------------------------|
| McIntyre, Cleland and Ramklass (2021) [49] | Qualitative, Semi-structured interviews | To explore facilitators and barriers to accessible wheelchair services                                                     | 11(8 occupational therapists and 3 physiotherapists) | South Africa                            |
| Dorjbal et al. (2020) [48]                 | Qualitative, Semi-structured interviews | To identify environmental barriers and their influence on daily life                                                       | 16(SCI patients)                                     | Mongolia                                |
| Jindal et al. (2018) [46]                  | Qualitative, Semi-structured interviews | To investigate parents' perceptions of rehabilitation and their information needs for their child with cerebral palsy (CP) | 18 (parents of children with CP)                     | India and Canada                        |
| Bhidayasiri et al. (2022) [50]             | Review article                          | To present clinical viewpoints on the unfulfilled needs of wearable technology, such as exoskeletons and orthoses          | N/A                                                  | N/A                                     |
| Layton (2012) [38]                         | Mixed method                            | To identify barriers and facilitators to optimal mobility from the perspective of AT users                                 | 100 (AT users. Neurological conditions)              | Australia, Survey, Open-ended responses |
| Mairami et al. (2017) [44]                 | Qualitative, case study, Semi-          | 1. To illustrate how AT influences stroke recovery and how the                                                             | 1(Stroke patient)                                    | Malaysia                                |

Theories, models and frameworks to understand barriers to the provision of mobility assistive technologies: A scoping review

|                                               |                                         |                                                                                                                              |                                                       |             |
|-----------------------------------------------|-----------------------------------------|------------------------------------------------------------------------------------------------------------------------------|-------------------------------------------------------|-------------|
|                                               | structured interview                    | environment might be altered to facilitate recovery<br>2. To examine the issues of AT affordability and accessibility        |                                                       |             |
| Dwyer and Mulligan (2015) [40]                | Literature review                       | To determine the obstacles and enablers for community reintegration as experienced by individuals with SCI                   | A total of 373 participants in the 7 included studies | New Zealand |
| Seymour, Geiger and Scheffler (2019) [47]     | Qualitative, Focus group                | To identify the issues associated with wheelchair provision and the elements that contribute to or mitigate these challenges | 21 (Community rehabilitation workers)                 | Uganda      |
| Gonçalves Junior, Knabben and Luz (2017) [43] | Qualitative, Semi-structured interviews | To demonstrate how people with lower limb amputation function and express their limitations                                  | 6 (patients with amputation)                          | Brazil      |
| Arthanat, Elsaesser and Bauer (2017) [42]     | Quantitative, Survey                    | To explore how AT providers perceive their education and training, the use of evidence and guidelines, financing policies.   | 318 (AT providers)                                    | US          |
| Gowran et al. (2021) [23]                     | Position Paper                          | To examine the global challenges related to wheelchair accessibility                                                         | N/A                                                   | N/A         |
| Steel and Layton (2016) [41]                  | Feature Article                         | An exploration of the complexities of AT provision in Australia                                                              | N/A                                                   | Australia   |
| Widehammar et al. (2020) [45]                 | Qualitative, Semi-structured interviews | An exploration of how users' experiences of power mobility products                                                          | 14(AT users)                                          | Sweden      |

Theories, models and frameworks to understand barriers to the provision of mobility assistive technologies: A scoping review

|                                      |                                                |                                                                                                                                              |                                                      |                |
|--------------------------------------|------------------------------------------------|----------------------------------------------------------------------------------------------------------------------------------------------|------------------------------------------------------|----------------|
|                                      |                                                | are influenced by environmental factors                                                                                                      |                                                      |                |
| Hammel et al. (2013) [39]            | Qualitative, multiple case study, Focus groups | Multiple stakeholders' perspectives, issues, and priorities related to accessing, using, and evaluating MATs                                 | 65(45 AT users, 10 caregivers, 10 service providers) | USA and Canada |
| Serres-Lafontaine et al. (2023) [51] | Qualitative, photovoice method                 | To study how peer training affects social involvement                                                                                        | 10 Wheelchair users (SCI patients)                   | Tanzania       |
| Oskar et al. (2011) [22]             | A postal questionnaire                         | To explore and assess the experiences of active wheelchair prescribers under the regulations and provisions set by local Swedish governments | 278 prescribers                                      | Sweden         |
| Smith et al. (2016) [52]             | Review article                                 | To investigate the determinants influencing participation among wheelchair users                                                             | 35 studies were included                             | N/A            |
| Nabizadeh et al., (2023) [16]        | Qualitative, Semi-structured interviews        | To explore barriers and facilitators to prosthetic services for lower limb amputees                                                          | 29 individuals with lower limb amputation            | Iran           |

Theories, models and frameworks to understand barriers to the provision of mobility assistive technologies: A scoping review

**Appendix 4 Table. Propositions identified in the theories, models and frameworks**

| Name of the theory,<br>model or framework                                 | Propositions                                                                                                                                                                                                                                                                                                                                                                                                                                                                                                                                                                                                                                                                                                                                                                                                                        |
|---------------------------------------------------------------------------|-------------------------------------------------------------------------------------------------------------------------------------------------------------------------------------------------------------------------------------------------------------------------------------------------------------------------------------------------------------------------------------------------------------------------------------------------------------------------------------------------------------------------------------------------------------------------------------------------------------------------------------------------------------------------------------------------------------------------------------------------------------------------------------------------------------------------------------|
| International Classification of Functioning, Disability, and Health (ICF) | <ol style="list-style-type: none"> <li>1. A health condition can affect both the mental and physical body functions.</li> <li>2. An individual's activities are impacted by their health condition.</li> <li>3. Health conditions affect an individual's engagement in activities, determining their level of participation.</li> <li>4. External factors, for example, social factors, can either inhibit or facilitate an individual's level of functioning.</li> <li>5. Society may create barriers, for example, inaccessible services or lack of facilitators, such as the unavailability of AT, which can affect an individual's performance.</li> <li>6. An individual's functioning is affected by the presence or absence of services, for example, equipment, products, and technologies in their environment.</li> </ol> |

Theories, models and frameworks to understand barriers to the provision of mobility assistive technologies: A scoping review

---

7. External elements like systems and policies that regulate and facilitate the provision of services can impact a person's functional capacity.
  8. An individual's level of functioning can also be influenced by external factors such as support and relationships, including family, people in positions of authority, and health professionals.
  9. Personal factors of an individual represent their internal aspects, including psychological factors, that can affect their level of functioning.
  10. Individuals' functioning and disabilities are influenced by their health status as well as contextual factors, such as environmental and personal factors.
  11. Functioning is defined as encompassing body functions, body structures, activities, and participation.
-



Theories, models and frameworks to understand barriers to the provision of mobility assistive technologies: A scoping review

---

12. An impairment, an activity limitation, or a restriction on participation constitutes a disability.

---

Levesque's conceptual framework

1. The concept of approachability is related to the ability of individuals with health needs to recognise the existence of available services, access them, and receive effective healthcare that can improve their health.
  2. Cultural and social factors determine the acceptability of health services within their context.
  3. The reachability of health services depends on their physical presence and timeliness.
  4. Factors like personal mobility, transportation availability, adaptability in occupation, and knowledge of accessible health services are interconnected and contribute to an individual's capacity to access healthcare providers physically.
-

Theories, models and frameworks to understand barriers to the provision of mobility assistive technologies: A scoping review

---

5. The concept of affordability in healthcare refers to the ability of people to pay for services without causing undue financial hardship or affecting their ability to afford basic necessities.
  6. The ability to afford healthcare services is connected to a person's financial resources, including income, savings, and borrowing capacity.
  7. Appropriateness in healthcare refers to the fit between the services provided and the needs and preferences of clients, as well as the quality and safety of those services.
  8. Engaging in healthcare involves the active participation of clients in decision-making and treatment planning, which helps to ensure that care is aligned with their goals and values.
  9. Accessibility of health services is affected by the availability of information.
-

Theories, models and frameworks to understand barriers to the provision of mobility assistive technologies: A scoping review

---

10. Personal autonomy and the ability to choose care-seeking are linked to the ability to access health care.

---

The Human Activity Assistive Technology model (HAAT)

1. AT enhances an individual's capabilities to complete desired tasks.
  2. Human activities are essential, learnable, and influenced by societal and cultural contexts.
  3. The use of desired technology is influenced by human skills and abilities (physical, cognitive, emotional).
  4. An individual's ability to perform activities is affected by their skills and abilities (physical, cognitive, emotional).
  5. The use of AT to perform an activity is influenced by various factors in the environment, including physical, social, cultural, and institutional elements.
-

Theories, models and frameworks to understand barriers to the provision of mobility assistive technologies: A scoping review

- 
6. Choosing and implementing the right AT requires considering the interaction between different elements, including the activity being performed, the user's needs and abilities, and the broader environmental context in which the technology will be used.
  7. The process of performing an activity leads to a functional result of human performance.

---

Gibson's affordances theory

1. Cognition: Affordances exist as a cognitive process which comes through people and organisations interacting with material entities.
  2. Perception: Affordances need to be perceived or recognised by the person or organisation.
  3. Behaviour: the affordance is actualised as the behaviour that people/organisations adopt acting on the perceived opportunity for action.
-

Theories, models and frameworks to understand barriers to the provision of mobility assistive technologies: A scoping review

---

4. Evaluation: Evaluating the effects of this behaviour.

5. Environmental factors and structures can impact disabilities.

---

Systemic development model (SDM)

1. Understanding personal, organisational, and institutional capacity requires consideration of factors such as health, culture, economics, and politics.
  2. It is crucial to provide appropriate services to improve the health, well-being, and fundamental freedoms of individuals in need.
  3. Limited access to services can create a cycle of poverty and disability.
  4. Service delivery systems that are tailored to specific contexts play a significant role in ensuring appropriate service provision.
  5. Economic factors impact the availability of products and services
-

Theories, models and frameworks to understand barriers to the provision of mobility assistive technologies: A scoping review

---

and can affect the viability of service provision.

6. Evaluation of the quality, development, performance, and procurement standards of products is crucial for improving service delivery systems and individual health outcomes.
7. Political governance also plays a role in ensuring access to appropriate services.

---

Multi Intervention Paradigm for Assessment and Application of Concurrent Treatments (IMPACT<sup>2</sup>)

1. The results of interventions can be outlined by examining the six phases, including: 1) Pre-Intervention, 2) Context, 3) Baseline, 4) Intervention Strategies, 5) Outcome Covariates, and 6) Outcomes.
  2. Personal and contextual factors influence the products and services used by individuals to perform activities.
-

Theories, models and frameworks to understand barriers to the provision of mobility assistive technologies: A scoping review

---

3. Universal design and health promotion are two methods that can be utilised to enhance functional performance.
  4. The context in which AT is used to perform a task within an environment is crucial for improving participation and QoL.
  5. Intervention approaches, such as reducing the impairment, compensating for the impairment, using AT, and redesigning the activity, are used to support the use of AT and optimise an individual's functioning.
  6. Consumer satisfaction is a desirable outcome of AT provision.
  7. Outcome(function) is defined as participation, QoL, and engagement.
  8. Cost influences the Intervention approaches therefore affecting Outcomes.
-

Theories, models and frameworks to understand barriers to the provision of mobility assistive technologies: A scoping review

---

Matching Person and Technology (MPT )

1. AT serves as a bridge between individual capabilities and the demands of tasks within their environment.
  2. Personal autonomy and the performance of everyday activities are enhanced by integrating technology that matches individual needs.
  3. The compatibility of assistive products with the user's lifestyle is crucial for successful adoption and satisfaction.
  4. The user's physical, cognitive, and emotional dimensions must be considered to optimise the functionality of AT.
  5. AT should empower individuals, promoting independence and self-efficacy in their desired roles and activities.
  6. The design and functionality of assistive technology must reflect the
-



Theories, models and frameworks to understand barriers to the provision of mobility assistive technologies: A scoping review

---

user's self-image and socio-cultural identity to foster acceptance.

7. AT should assist and elevate the user's ability to engage in social roles and activities with confidence and ease.
8. The choice of AT is personal, influenced by individual preferences, aspirations, and the context of their lives.
9. Effective AT integrates into the user's environment, enhancing their capabilities without introducing new barriers.
10. The success of an assistive product is measured not only by its technical features but also by its ability to align with the user's psychosocial context and enhance their QoL.

---

Penchansky and Thomas' framework of access

1. Access is defined by the degree to which healthcare systems are
-

Theories, models and frameworks to understand barriers to the provision of mobility assistive technologies: A scoping review

---

1  
2  
3  
4  
5 equipped to meet the requirements of  
6  
7 patients

8  
9  
10 2. Affordability assesses whether the  
11 costs imposed by the provider align  
12 with the client's financial capacity and  
13 willingness to pay for the services  
14 offered.

15  
16  
17 3. Availability refers to the provider's  
18 capacity to meet the client's needs  
19 through adequate resources, including  
20 staff and technology.

21  
22  
23 4. Accessibility concerns the ease with  
24 which clients can physically reach the  
25 provider's location.

26  
27  
28 5. Accommodation evaluates the extent  
29 to which the provider's operational  
30 procedures, such as hours of operation  
31 and telephone communication, are  
32 convenient for the client.

33  
34  
35 6. Acceptability pertains to the degree of  
36 comfort the client experiences with the  
37 provider's fixed characteristics and  
38 encompasses considerations of the client's  
39  
40  
41  
42  
43  
44  
45  
46  
47  
48  
49  
50  
51  
52  
53  
54  
55  
56  
57  
58  
59  
60

---

Theories, models and frameworks to understand barriers to the provision of mobility assistive technologies: A scoping review

---

health condition and type of health

coverage.

---

For peer review only

Theories, models and frameworks to understand barriers to the provision of mobility assistive technologies: A scoping review

Appendix 5, Table. Gaps analysis

| Gaps                             | Recommendations for future research                                                                                                                                                                                                                                                                                                                                                                                                 |
|----------------------------------|-------------------------------------------------------------------------------------------------------------------------------------------------------------------------------------------------------------------------------------------------------------------------------------------------------------------------------------------------------------------------------------------------------------------------------------|
| Remote Regions and Accessibility | Key areas for future investigation included examining access to AT in remote regions [38, 49, 46] by investigating challenges and barriers faced in remote regions [49], and explore the differences between men and women in accessing services [16], and concentrating on modifiable elements like wheelchair skills and ease of access [51]                                                                                      |
| Stakeholder Perspectives         | The included papers in this review draw attention to several issues, such as investigating policymakers' and HCPs' views on rehabilitation services [46]. Understanding the challenges faced by people with disabilities [51]. This includes understanding stakeholder perspectives on the various aspects of access by identifying the enablers and barriers that might aid in planning to increase access to AT services [47,49]. |
| Funding, Policy, and Legislation | Future research should investigate funding and policy-related barriers [ 22, 40, 42, 48], the impact of legislation on accessibility and participation for powered mobility product users [45], fostering low-cost approaches in low- and middle-income countries [44], and promoting inclusive solutions for wheelchair service provision [23,51].                                                                                 |

Theories, models and frameworks to understand barriers to the provision of mobility assistive technologies: A scoping review

|                                                 |                                                                                                                                                                                                                                                                                                                                                                                                                                                           |
|-------------------------------------------------|-----------------------------------------------------------------------------------------------------------------------------------------------------------------------------------------------------------------------------------------------------------------------------------------------------------------------------------------------------------------------------------------------------------------------------------------------------------|
| Data Collection and methodological improvements | Adoption of standardised instruments to assess functioning and disability is needed [43,45]. Comparing perceptions users with and without AT [43,45]. Exploration of user satisfaction, choice, and control in relation to MATs and its impact on overall outcomes [39]. Development of standards for testing AT effectiveness [50]. Additionally, research could explore the long-term effects of delayed services on individuals with disabilities [16] |
| Contextual Understanding and service evaluation | Importance of investigating in-country perspectives consideration of personal, social, economic, environmental, historical, and political factors [23]. Incorporating subjective measures in service evaluations [41]. Assessing the effects of new products on work environments and identifying the annually prescribed types of AT are essential undertakings [22].                                                                                    |
