# Supplementary material for: Theories, models and frameworks to understand barriers to the provision of mobility-assistive technologies: a scoping review
Source: PubMed Central journal article supplement — BMJ Open. 2024 May 15;14(5):e080633. doi: 10.1136/bmjopen-2023-080633 (PMC11097887; doi:10.1136/bmjopen-2023-080633), 2024-05-15
Supplement: bmjopen-2023-080633supp002.pdf [file bmjopen-2023-080633supp002.pdf]

## Appendix 2. Systematic search conducted in MEDLINE, EMBASE and CINAHL, SCOPUS

Database(s): Ovid MEDLINE(R) Search Strategy:

| #  | Query                                                                                                              | Results from 29 Apr 2024 |
|----|--------------------------------------------------------------------------------------------------------------------|--------------------------|
| 1  | (Access* adj10 (barrier* or challeng* or restrict* or obstacle* or impediment* or difficult* or issue*)).ab,ti.    | 66,790                   |
| 2  | (Provision* adj10 (barrier* or challeng* or restrict* or obstacle* or impediment* or difficult* or issue*)).ab,ti. | 8,055                    |
| 3  | (Provide* adj10 (barrier* or challeng* or restrict* or obstacle* or impediment* or difficult* or issue*)).ab,ti.   | 106,675                  |
| 4  | (Adoption* adj10 (barrier* or challeng* or restrict* or obstacle* or impediment* or difficult* or issue*)).ab,ti.  | 7,844                    |
| 5  | Wheelchairs/                                                                                                       | 5,537                    |
| 6  | Orthotic Devices/                                                                                                  | 7,015                    |
| 7  | Exoskeleton Device/                                                                                                | 1,640                    |
| 8  | Mobility device*.ab,ti.                                                                                            | 545                      |
| 9  | Mobility technolog*.ab,ti.                                                                                         | 55                       |
| 10 | Wheelchair*.ab,ti.                                                                                                 | 8,976                    |
| 11 | Scooter*.ab,ti.                                                                                                    | 865                      |
| 12 | Walker*.ab,ti.                                                                                                     | 15,558                   |
| 13 | Prosthetic*.ab,ti.                                                                                                 | 64,965                   |
| 14 | prosthesis/                                                                                                        | 50,410                   |
| 15 | orthotic*.ab,ti.                                                                                                   | 3,776                    |
| 16 | Self-Help Devices/                                                                                                 | 5,878                    |
| 17 | Exoskeleton*.ab,ti.                                                                                                | 4,856                    |
| 18 | Orthos*.ab,ti.                                                                                                     | 26,556                   |
| 19 | power mobility.ab,ti.                                                                                              | 135                      |
| 20 | Prosthe* device*.ab,ti.                                                                                            | 2,437                    |
| 21 | (Assistive technolog* adj10 mobility).ab,ti.                                                                       | 137                      |
| 22 | (Assistive device* adj10 mobility).ab,ti.                                                                          | 217                      |
| 23 | assistive product*.ab,ti.                                                                                          | 114                      |
| 24 | mobility product*.ab,ti.                                                                                           | 24                       |
| 25 | Disabled Persons/                                                                                                  | 48,730                   |
| 26 | Mobility Limitation/                                                                                               | 5,333                    |
| 27 | Elder*.ti,ab.                                                                                                      | 312,960                  |
| 28 | Physical* Disable*.ab,ti.                                                                                          | 951                      |
| 29 | Disable*.ab,ti.                                                                                                    | 29,789                   |
| 30 | Disabilit*.ab,ti.                                                                                                  | 253,216                  |
| 31 | Walking difficult*.ab,ti.                                                                                          | 697                      |
| 32 | Handicap*.ab,ti.                                                                                                   | 26,114                   |
| 33 | physical* impair*.ab,ti.                                                                                           | 3,224                    |
| 34 | physical* Challeng*.ab,ti.                                                                                         | 714                      |
| 35 | Ambulat* Difficult*.ab,ti.                                                                                         | 90                       |
| 36 | Mobility difficult*.ab,ti.                                                                                         | 255                      |

|    |                                                                                                                 |            |
|----|-----------------------------------------------------------------------------------------------------------------|------------|
| 37 | Mobility impair*.ab,ti.                                                                                         | 1,413      |
| 38 | Mobility limit*.ab,ti.                                                                                          | 1,503      |
| 39 | Amput*.ab,ti.                                                                                                   | 54,578     |
| 40 | Motor difficult*.ab,ti.                                                                                         | 553        |
| 41 | Amputation/                                                                                                     | 24,235     |
| 42 | Geriatrics/                                                                                                     | 31,638     |
| 43 | (theor* or framework* or model* or taxonom* or classifi* or concept*).ab,ti.                                    | 5,908,724  |
| 44 | (Matching Person and Technology).ab,ti.                                                                         | 22         |
| 45 | ((("abandonment" or "discontinuance") and "model").ab,ti.                                                       | 665        |
| 46 | ("SETT " or "Student Environment Tasks Tools").ab,ti.                                                           | 92         |
| 47 | ("WATI" or "Wisconsin Assistive Technology Initiative").ab,ti.                                                  | 21         |
| 48 | ("ATOMS" or "Assistive Technology Outcomes Measurement System").ab,ti.                                          | 113,166    |
| 49 | 1 or 2 or 3 or 4                                                                                                | 181,073    |
| 50 | 25 or 26 or 27 or 28 or 29 or 30 or 31 or 32 or 33 or 34 or 35 or 36 or 37 or 38 or 39 or 40 or 41 or 42        | 703,079    |
| 51 | 5 or 6 or 7 or 8 or 9 or 10 or 11 or 12 or 13 or 14 or 15 or 16 or 17 or 18 or 19 or 20 or 21 or 22 or 23 or 24 | 179,179    |
| 52 | 43 or 44 or 45 or 46 or 47 or 48                                                                                | 5,978,819  |
| 53 | 49 and 50 and 51 and 52                                                                                         | 129        |
| 54 | limit 53 to english language                                                                                    | 123        |
| 55 | limit 54 to dt=20000101-20240320                                                                                | <b>121</b> |
| 56 | limit 55 to dt=20230615-20240320                                                                                | 7          |
| 57 | 45 or 46 or 47 or 48                                                                                            | 113,944    |
| 58 | 49 and 50 and 51 and 57                                                                                         | 1          |

Database(s): **Ovid Embase** Search Strategy:

| #  | Query                                                                                                              | Results from 29 Apr 2024 |
|----|--------------------------------------------------------------------------------------------------------------------|--------------------------|
| 1  | (Access* adj10 (barrier* or challeng* or restrict* or obstacle* or impediment* or difficult* or issue*)).ab,ti.    | 90,641                   |
| 2  | (Provision* adj10 (barrier* or challeng* or restrict* or obstacle* or impediment* or difficult* or issue*)).ab,ti. | 10,610                   |
| 3  | (Provide* adj10 (barrier* or challeng* or restrict* or obstacle* or impediment* or difficult* or issue*)).ab,ti.   | 133,811                  |
| 4  | (Adoption* adj10 (barrier* or challeng* or restrict* or obstacle* or impediment* or difficult* or issue*)).ab,ti.  | 9,176                    |
| 5  | Wheelchairs/                                                                                                       | 11,508                   |
| 6  | Orthotic Devices/                                                                                                  | 7,508                    |
| 7  | Exoskeleton Device/                                                                                                | 1,477                    |
| 8  | Mobility device*.ab,ti.                                                                                            | 661                      |
| 9  | Mobility technolog*.ab,ti.                                                                                         | 63                       |
| 10 | Wheelchair*.ab,ti.                                                                                                 | 13,489                   |
| 11 | Scooter*.ab,ti.                                                                                                    | 1,053                    |
| 12 | Walker*.ab,ti.                                                                                                     | 18,160                   |
| 13 | Prosthetic*.ab,ti.                                                                                                 | 77,740                   |
| 14 | prosthesis/                                                                                                        | 34,227                   |
| 15 | orthotic*.ab,ti.                                                                                                   | 5,449                    |
| 16 | Self-Help Devices/                                                                                                 | 3,100                    |
| 17 | Exoskeleton*.ab,ti.                                                                                                | 5,373                    |
| 18 | Orthos*.ab,ti.                                                                                                     | 36,813                   |
| 19 | power mobility.ab,ti.                                                                                              | 165                      |
| 20 | Prosthe* device*.ab,ti.                                                                                            | 2,852                    |
| 21 | (Assistive technolog* adj10 mobility).ab,ti.                                                                       | 170                      |
| 22 | (Assistive device* adj10 mobility).ab,ti.                                                                          | 311                      |
| 23 | assistive product*.ab,ti.                                                                                          | 123                      |
| 24 | mobility product*.ab,ti.                                                                                           | 24                       |
| 25 | Disabled Persons/                                                                                                  | 31,998                   |
| 26 | Mobility Limitation/                                                                                               | 15,084                   |
| 27 | Elder*.ti,ab.                                                                                                      | 443,632                  |
| 28 | Physical* Disable*.ab,ti.                                                                                          | 1,219                    |
| 29 | Disable*.ab,ti.                                                                                                    | 38,656                   |
| 30 | Disabilit*.ab,ti.                                                                                                  | 357,400                  |
| 31 | Walking difficult*.ab,ti.                                                                                          | 1,272                    |
| 32 | Handicap*.ab,ti.                                                                                                   | 31,880                   |
| 33 | physical* impair*.ab,ti.                                                                                           | 4,567                    |
| 34 | physical* Challeng*.ab,ti.                                                                                         | 982                      |
| 35 | Ambulat* Difficult*.ab,ti.                                                                                         | 136                      |
| 36 | Mobility difficult*.ab,ti.                                                                                         | 350                      |
| 37 | Mobility impair*.ab,ti.                                                                                            | 1,873                    |
| 38 | Mobility limit*.ab,ti.                                                                                             | 1,986                    |
| 39 | Amput*.ab,ti.                                                                                                      | 68,468                   |
| 40 | Motor difficult*.ab,ti.                                                                                            | 767                      |
| 41 | Amputation/                                                                                                        | 27,148                   |
| 42 | Geriatrics/                                                                                                        | 34,606                   |

|    |                                                                                                                 |            |
|----|-----------------------------------------------------------------------------------------------------------------|------------|
| 43 | (theor* or framework* or model* or taxonom* or classifi* or concept*).ab,ti.                                    | 7,279,458  |
| 44 | (Matching Person and Technology).ab,ti.                                                                         | 32         |
| 45 | ((("abandonment" or "discontinuance") and "model").ab,ti.                                                       | 827        |
| 46 | ("SETT " or "Student Environment Tasks Tools").ab,ti.                                                           | 156        |
| 47 | ("WATI" or "Wisconsin Assistive Technology Initiative").ab,ti.                                                  | 45         |
| 48 | ("ATOMS" or "Assistive Technology Outcomes Measurement System").ab,ti.                                          | 80,470     |
| 49 | 1 or 2 or 3 or 4                                                                                                | 233,091    |
| 50 | 25 or 26 or 27 or 28 or 29 or 30 or 31 or 32 or 33 or 34 or 35 or 36 or 37 or 38 or 39 or 40 or 41 or 42        | 958,285    |
| 51 | 5 or 6 or 7 or 8 or 9 or 10 or 11 or 12 or 13 or 14 or 15 or 16 or 17 or 18 or 19 or 20 or 21 or 22 or 23 or 24 | 189,829    |
| 52 | 43 or 44 or 45 or 46 or 47 or 48                                                                                | 7,328,459  |
| 53 | 49 and 50 and 51 and 52                                                                                         | 143        |
| 54 | limit 53 to english language                                                                                    | 140        |
| 55 | limit 54 to dc=20000101-20240320                                                                                | <b>138</b> |
| 56 | limit 55 to dc=20230615-20240320                                                                                | 10         |
| 57 | 45 or 46 or 47 or 48                                                                                            | 81,498     |
| 58 | 49 and 50 and 51 and 57                                                                                         | 0          |

## Database(s): EBSCO CINAHL Search Strategy:

| #   | Query                                                                                                                                                    | Results from<br>29 Apr 2024 |
|-----|----------------------------------------------------------------------------------------------------------------------------------------------------------|-----------------------------|
| S58 | S49 AND S50 AND S51 AND S57                                                                                                                              | 0                           |
| S57 | S45 OR S46 OR S47 OR S48                                                                                                                                 | 587                         |
| S56 | (S54 AND EM 20230620-20240320) AND (S45 OR S46 OR S47 OR S48)                                                                                            | 0                           |
| S55 | S54 AND EM 20230620-20240320                                                                                                                             | 4                           |
| S54 | S53 AND EM 20000101-20240320                                                                                                                             | 83                          |
| S53 | (S43 OR S44 OR S45 OR S46 OR S47 OR S48) AND (S49 AND S50 AND S51 AND S52) Limiters - Language: English                                                  | 87                          |
| S52 | S43 OR S44 OR S45 OR S46 OR S47 OR S48                                                                                                                   | 1,068,868                   |
| S51 | S25 OR S26 OR S27 OR S28 OR S29 OR S30 OR S31 OR S32 OR S33 OR S34 OR S35 OR S36 OR S37 OR S38 OR S39 OR S40 OR S41 OR S42                               | 295,657                     |
| S50 | S5 OR S6 OR S7 OR S8 OR S9 OR S10 OR S11 OR S12 OR S13 OR S14 OR S15 OR S16 OR S17 OR S18 OR S19 OR S20 OR S21 OR S22 OR S23 OR S24                      | 42,403                      |
| S49 | S1 OR S2 OR S3 OR S4                                                                                                                                     | 73,674                      |
| S48 | (TI "ATOMS " OR AB "ATOMS " OR TI "Assistive Technology Outcomes Measurement System" OR AB "Assistive Technology Outcomes Measurement System")           | 325                         |
| S47 | (TI "WATI " OR AB "WATI " OR TI "Wisconsin Assistive Technology Initiative" OR AB "Wisconsin Assistive Technology Initiative")                           | 13                          |
| S46 | (TI "SETT" OR AB "SETT" OR TI "Student Environment Tasks Tools" OR AB "Student Environment Tasks Tools")                                                 | 42                          |
| S45 | TI (("abandonment" or "discontinuance") and "model") OR AB (("abandonment" or "discontinuance") and "model")                                             | 207                         |
| S44 | TI "Matching Person and Technology" OR AB "Matching Person and Technology"                                                                               | 23                          |
| S43 | TI ( theor* OR framework* OR model* OR taxonom* OR classifi* OR concept* ) OR AB ( theor* OR framework* OR model* OR taxonom* OR classifi* OR concept* ) | 1,068,584                   |
| S42 | (MH "Geriatrics")                                                                                                                                        | 6,059                       |
| S41 | (MH "Amputation")                                                                                                                                        | 7,629                       |
| S40 | TI "Motor difficult*" OR AB "Motor difficult*"                                                                                                           | 246                         |
| S39 | TI Amput* OR AB Amput*                                                                                                                                   | 15,087                      |
| S38 | TI "Mobility limit*" OR AB "Mobility limit*"                                                                                                             | 973                         |
| S37 | TI "Mobility impair*" OR AB "Mobility impair*"                                                                                                           | 802                         |
| S36 | TI "Mobility difficult*" OR AB "Mobility difficult*"                                                                                                     | 162                         |
| S35 | TI "Ambulat* Difficult*" OR AB "Ambulat* Difficult*"                                                                                                     | 25                          |
| S34 | TI "physical* Challeng*" OR AB "physical* Challeng*"                                                                                                     | 389                         |
| S33 | TI "physical* impair*" OR AB "physical* impair*"                                                                                                         | 1,734                       |
| S32 | TI Handicap* OR AB Handicap*                                                                                                                             | 6,460                       |
| S31 | TI "Walking difficult*" OR AB "Walking difficult*"                                                                                                       | 238                         |
| S30 | TI Disabilit* OR AB Disabilit*                                                                                                                           | 128,095                     |
| S29 | TI Disable* OR AB Disable*                                                                                                                               | 12,965                      |
| S28 | TI "Physical* Disable*" OR AB "Physical* Disable*"                                                                                                       | 711                         |
| S27 | TI Elder* OR AB Elder*                                                                                                                                   | 114,587                     |
| S26 | (MH "Physical Mobility")                                                                                                                                 | 7,823                       |
| S25 | (MH "Persons with Disabilities")                                                                                                                         | 37,595                      |
| S24 | TI "mobility product*" OR AB "mobility product*"                                                                                                         | 6                           |
| S23 | TI "assistive product*" OR AB "assistive product*"                                                                                                       | 69                          |

|     |                                                                                                                                                                                                                                      |        |
|-----|--------------------------------------------------------------------------------------------------------------------------------------------------------------------------------------------------------------------------------------|--------|
| S22 | TI ("Assistive device*" n10 mobility) OR AB ("Assistive device*" n10 mobility)                                                                                                                                                       | 157    |
| S21 | TI ("Assistive technolog*" n10 mobility) OR AB ("Assistive technolog*" n10 mobility)                                                                                                                                                 | 131    |
| S20 | TI "Prosthet* device*" OR AB "Prosthet* device*"                                                                                                                                                                                     | 406    |
| S19 | TI "power mobility" OR AB "power mobility"                                                                                                                                                                                           | 136    |
| S18 | TI Orthose* OR AB Orthose*                                                                                                                                                                                                           | 2,498  |
| S17 | TI Exoskeleton* OR AB Exoskeleton*                                                                                                                                                                                                   | 813    |
| S16 | (MH "Assistive Technology Devices")                                                                                                                                                                                                  | 6,771  |
| S15 | TI orthotic* OR AB orthotic*                                                                                                                                                                                                         | 2,702  |
| S14 | (MH "Limb Prosthesis")                                                                                                                                                                                                               | 3,007  |
| S13 | TI Prosthetic* OR AB Prosthetic*                                                                                                                                                                                                     | 12,814 |
| S12 | TI Walker* OR AB Walker*                                                                                                                                                                                                             | 3,878  |
| S11 | TI Scooter* OR AB Scooter*                                                                                                                                                                                                           | 453    |
| S10 | TI Wheelchair* OR AB Wheelchair*                                                                                                                                                                                                     | 5,824  |
| S9  | TI "Mobility technolog*" OR AB "Mobility technolog*"                                                                                                                                                                                 | 40     |
| S8  | TI ( "Mobility device*") OR AB ( "Mobility device*")                                                                                                                                                                                 | 428    |
| S7  | (MH "Exoskeleton Devices")                                                                                                                                                                                                           | 347    |
| S6  | (MH "Orthoses")                                                                                                                                                                                                                      | 7,176  |
| S5  | (MH "Wheelchairs")                                                                                                                                                                                                                   | 5,140  |
| S4  | TI ( (Adoption* n10 (barrier* or challeng* or restrict* or obstacle* or impediment* or difficult* or issue*)) ) OR AB ( (Adoption* n10 (barrier* or challeng* or restrict* or obstacle* or impediment* or difficult* or issue*)) )   | 3,272  |
| S3  | TI ( Provide* n10 (barrier* or challeng* or restrict* or obstacle* or impediment* or difficult* or issue*)) ) OR AB ( Provide* n10 (barrier* or challeng* or restrict* or obstacle* or impediment* or difficult* or issue*)) )       | 40,826 |
| S2  | TI ( (Provision* n10 (barrier* or challeng* or restrict* or obstacle* or impediment* or difficult* or issue*)) ) OR AB ( (Provision* n10 (barrier* or challeng* or restrict* or obstacle* or impediment* or difficult* or issue*)) ) | 5,221  |
| S1  | TI ( (Access* n10 (barrier* or challeng* or restrict* or obstacle* or impediment* or difficult* or issue*)) ) OR AB ( (Access* n10 (barrier* or challeng* or restrict* or obstacle* or impediment* or difficult* or issue*)) )       | 29,525 |

Database(s): **Scopus** Search Strategy:

```
(( ( TITLE-ABS ( access* W/10 ( barrier* OR challeng* OR restrict* OR obstacle* OR impediment* OR difficult* OR issue* ) ) ) ) OR ( ( TITLE-ABS ( provision* W/10 ( barrier* OR challeng* OR restrict* OR obstacle* OR impediment* OR difficult* OR issue* ) ) ) ) OR ( ( TITLE-ABS ( provide* W/10 ( barrier* OR challeng* OR restrict* OR obstacle* OR impediment* OR difficult* OR issue* ) ) ) ) OR ( ( TITLE-ABS ( adoption* W/10 ( barrier* OR challeng* OR restrict* OR obstacle* OR impediment* OR difficult* OR issue* ) ) ) ) ) AND ( TITLE-ABS ( "Disabled Person*" OR "Mobility* Limitation*" OR elder* OR "Physically Disabled" OR disable* OR disabilit* OR "Walking difficult*" OR handicap* OR "physically impair*" OR "Physically Challeng*" OR "Ambulat* difficult*" OR "Mobility difficult*" OR "Mobility impair*" OR "Mobility limit*" OR "Amput*" OR "Motor difficult*" OR amputation* ) ) AND ( TITLE-ABS ( theor* OR framework* OR model* OR taxonom* OR classifi* OR concept* OR "Matching Person and Technology" OR ( abandonment OR discontinuance AND model ) ) ) AND ( TITLE-ABS ( wheelchair* OR "power mobility*" OR "Mobility device*" OR "Mobility technolog*" OR ( "Assistive technolog*" W/10 mobility ) OR ( "Assistive device*" W/10 mobility ) OR orthotic* OR exoskeleton* OR scooter* OR walker* OR prosthet* OR orthos* OR prosthetic* OR "Prosthe* device*" OR orthotic* OR "mobility product*" OR "assistive product*" ) ) AND PUBYEAR > 1999 AND PUBYEAR < 2025 AND ( LIMIT-TO ( LANGUAGE , "English" ) ) ) 173 documents
```

```
(( ( TITLE-ABS ( access* W/10 ( barrier* OR challeng* OR restrict* OR obstacle* OR impediment* OR difficult* OR issue* ) ) ) ) OR ( ( TITLE-ABS ( provision* W/10 ( barrier* OR challeng* OR restrict* OR obstacle* OR impediment* OR difficult* OR issue* ) ) ) ) OR ( ( TITLE-ABS ( provide* W/10 ( barrier* OR challeng* OR restrict* OR obstacle* OR impediment* OR difficult* OR issue* ) ) ) ) OR ( ( TITLE-ABS ( adoption* W/10 ( barrier* OR challeng* OR restrict* OR obstacle* OR impediment* OR difficult* OR issue* ) ) ) ) ) AND ( TITLE-ABS ( "Disabled Person*" OR "Mobility* Limitation*" OR elder* OR "Physically Disabled" OR disable* OR disabilit* OR "Walking difficult*" OR handicap* OR "physically impair*" OR "Physically Challeng*" OR "Ambulat* difficult*" OR "Mobility difficult*" OR "Mobility impair*" OR "Mobility limit*" OR "Amput*" OR "Motor difficult*" OR amputation* ) ) AND ( TITLE-ABS ( "sett" OR "student environment tasks tools" OR "wati" OR "Wisconsin assistive technology initiative" OR "atoms" OR "assistive technology outcomes measurement system" OR ("abandonment" OR "discontinuance" AND "model" ) ) ) AND ( TITLE-ABS ( wheelchair* OR "power mobility*" OR "Mobility device*" OR "Mobility technolog*" OR ( "Assistive technolog*" W/10 mobility ) OR ( "Assistive device*" W/10 mobility ) OR orthotic* OR exoskeleton* OR scooter* OR walker* OR prosthet* OR orthos* OR prosthetic* OR "Prosthe* device*" OR orthotic* OR "mobility product*" OR "assistive product*" ) ) AND PUBYEAR > 1999 AND PUBYEAR < 2025 AND ( LIMIT-TO ( LANGUAGE , "English" ) ) )
```
