# Supplementary material for: Theories, models and frameworks to understand barriers to the provision of mobility-assistive technologies: a scoping review
Source: PubMed Central journal article supplement — BMJ Open. 2024 May 15;14(5):e080633. doi: 10.1136/bmjopen-2023-080633 (PMC11097887; doi:10.1136/bmjopen-2023-080633), 2024-05-15
Supplement: bmjopen-2023-080633supp003.pdf [file bmjopen-2023-080633supp003.pdf]

## Theories, models and frameworks to understand barriers to the provision of mobility assistive technologies: A scoping review

Appendix 3, Table. Characteristics of included papers

| <b>Authors and Year</b>                    | <b>Study design</b>                     | <b>Aims of the study</b>                                                                                                   | <b>Population (n, characteristics)</b>               | <b>Country</b>                          |
|--------------------------------------------|-----------------------------------------|----------------------------------------------------------------------------------------------------------------------------|------------------------------------------------------|-----------------------------------------|
| McIntyre, Cleland and Ramklass (2021) [49] | Qualitative, Semi-structured interviews | To explore facilitators and barriers to accessible wheelchair services                                                     | 11(8 occupational therapists and 3 physiotherapists) | South Africa                            |
| Dorjbal et al. (2020) [48]                 | Qualitative, Semi-structured interviews | To identify environmental barriers and their influence on daily life                                                       | 16(SCI patients)                                     | Mongolia                                |
| Jindal et al. (2018) [46]                  | Qualitative, Semi-structured interviews | To investigate parents' perceptions of rehabilitation and their information needs for their child with cerebral palsy (CP) | 18 (parents of children with CP)                     | India and Canada                        |
| Bhidayasiri et al. (2022) [50]             | Review article                          | To present clinical viewpoints on the unfulfilled needs of wearable technology, such as exoskeletons and orthoses          | N/A                                                  | N/A                                     |
| Layton (2012) [38]                         | Mixed method                            | To identify barriers and facilitators to optimal mobility from the perspective of AT users                                 | 100 (AT users. Neurological conditions)              | Australia, Survey, Open-ended responses |
| Mairami et al. (2017) [44]                 | Qualitative, case study, Semi-          | 1. To illustrate how AT influences stroke recovery and how the                                                             | 1(Stroke patient)                                    | Malaysia                                |

## Theories, models and frameworks to understand barriers to the provision of mobility assistive technologies: A scoping review

|                                               |                                         |                                                                                                                              |                                                       |             |
|-----------------------------------------------|-----------------------------------------|------------------------------------------------------------------------------------------------------------------------------|-------------------------------------------------------|-------------|
|                                               | structured interview                    | environment might be altered to facilitate recovery<br>2. To examine the issues of AT affordability and accessibility        |                                                       |             |
| Dwyer and Mulligan (2015) [40]                | Literature review                       | To determine the obstacles and enablers for community reintegration as experienced by individuals with SCI                   | A total of 373 participants in the 7 included studies | New Zealand |
| Seymour, Geiger and Scheffler (2019) [47]     | Qualitative, Focus group                | To identify the issues associated with wheelchair provision and the elements that contribute to or mitigate these challenges | 21 (Community rehabilitation workers)                 | Uganda      |
| Gonçalves Junior, Knabben and Luz (2017) [43] | Qualitative, Semi-structured interviews | To demonstrate how people with lower limb amputation function and express their limitations                                  | 6 (patients with amputation)                          | Brazil      |
| Arthanat, Elsaesser and Bauer (2017) [42]     | Quantitative, Survey                    | To explore how AT providers perceive their education and training, the use of evidence and guidelines, financing policies.   | 318 (AT providers)                                    | US          |
| Gowran et al. (2021) [23]                     | Position Paper                          | To examine the global challenges related to wheelchair accessibility                                                         | N/A                                                   | N/A         |
| Steel and Layton (2016) [41]                  | Feature Article                         | An exploration of the complexities of AT provision in Australia                                                              | N/A                                                   | Australia   |
| Widehammar et al. (2020) [45]                 | Qualitative, Semi-structured interviews | An exploration of how users' experiences of power mobility products                                                          | 14(AT users)                                          | Sweden      |

## Theories, models and frameworks to understand barriers to the provision of mobility assistive technologies: A scoping review

|                                      |                                                |                                                                                                                                              |                                                      |                |
|--------------------------------------|------------------------------------------------|----------------------------------------------------------------------------------------------------------------------------------------------|------------------------------------------------------|----------------|
|                                      |                                                | are influenced by environmental factors                                                                                                      |                                                      |                |
| Hammel et al. (2013) [39]            | Qualitative, multiple case study, Focus groups | Multiple stakeholders' perspectives, issues, and priorities related to accessing, using, and evaluating MATs                                 | 65(45 AT users, 10 caregivers, 10 service providers) | USA and Canada |
| Serres-Lafontaine et al. (2023) [51] | Qualitative, photovoice method                 | To study how peer training affects social involvement                                                                                        | 10 Wheelchair users (SCI patients)                   | Tanzania       |
| Oskar et al. (2011) [22]             | A postal questionnaire                         | To explore and assess the experiences of active wheelchair prescribers under the regulations and provisions set by local Swedish governments | 278 prescribers                                      | Sweden         |
| Smith et al. (2016) [52]             | Review article                                 | To investigate the determinants influencing participation among wheelchair users                                                             | 35 studies were included                             | N/A            |
| Nabizadeh et al., (2023) [16]        | Qualitative, Semi-structured interviews        | To explore barriers and facilitators to prosthetic services for lower limb amputees                                                          | 29 individuals with lower limb amputation            | Iran           |
