# Supplementary material for: Theories, models and frameworks to understand barriers to the provision of mobility-assistive technologies: a scoping review
Source: PubMed Central journal article supplement — BMJ Open. 2024 May 15;14(5):e080633. doi: 10.1136/bmjopen-2023-080633 (PMC11097887; doi:10.1136/bmjopen-2023-080633), 2024-05-15
Supplement: bmjopen-2023-080633supp005.pdf [file bmjopen-2023-080633supp005.pdf]

Theories, models and frameworks to understand barriers to the provision of mobility assistive technologies: A scoping review

Appendix 5, Table. Gaps analysis

| <b>Gaps</b>                      | <b>Recommendations for future research</b>                                                                                                                                                                                                                                                                                                                                                                                          |
|----------------------------------|-------------------------------------------------------------------------------------------------------------------------------------------------------------------------------------------------------------------------------------------------------------------------------------------------------------------------------------------------------------------------------------------------------------------------------------|
| Remote Regions and Accessibility | Key areas for future investigation included examining access to AT in remote regions [38, 49, 46] by investigating challenges and barriers faced in remote regions [49], and explore the differences between men and women in accessing services [16], and concentrating on modifiable elements like wheelchair skills and ease of access [51]                                                                                      |
| Stakeholder Perspectives         | The included papers in this review draw attention to several issues, such as investigating policymakers' and HCPs' views on rehabilitation services [46]. Understanding the challenges faced by people with disabilities [51]. This includes understanding stakeholder perspectives on the various aspects of access by identifying the enablers and barriers that might aid in planning to increase access to AT services [47,49]. |
| Funding, Policy, and Legislation | Future research should investigate funding and policy-related barriers [ 22, 40, 42, 48], the impact of legislation on accessibility and participation for powered mobility product users [45], fostering low-cost approaches in low- and middle-income countries [44], and promoting inclusive solutions for wheelchair service provision [23,51].                                                                                 |

Theories, models and frameworks to understand barriers to the provision of mobility assistive technologies: A scoping review

|                                                 |                                                                                                                                                                                                                                                                                                                                                                                                                                                           |
|-------------------------------------------------|-----------------------------------------------------------------------------------------------------------------------------------------------------------------------------------------------------------------------------------------------------------------------------------------------------------------------------------------------------------------------------------------------------------------------------------------------------------|
| Data Collection and methodological improvements | Adoption of standardised instruments to assess functioning and disability is needed [43,45]. Comparing perceptions users with and without AT [43,45]. Exploration of user satisfaction, choice, and control in relation to MATs and its impact on overall outcomes [39]. Development of standards for testing AT effectiveness [50]. Additionally, research could explore the long-term effects of delayed services on individuals with disabilities [16] |
| Contextual Understanding and service evaluation | Importance of investigating in-country perspectives consideration of personal, social, economic, environmental, historical, and political factors [23]. Incorporating subjective measures in service evaluations [41]. Assessing the effects of new products on work environments and identifying the annually prescribed types of AT are essential undertakings [22].                                                                                    |
