# Supplementary material for: Theories, models and frameworks to understand barriers to the provision of mobility-assistive technologies: a scoping review
Source: PubMed Central journal article supplement — BMJ Open. 2024 May 15;14(5):e080633. doi: 10.1136/bmjopen-2023-080633 (PMC11097887; doi:10.1136/bmjopen-2023-080633), 2024-05-15

Supplemental Figure 1. Theories, models, frameworks, and their purpose of application in eligible studies

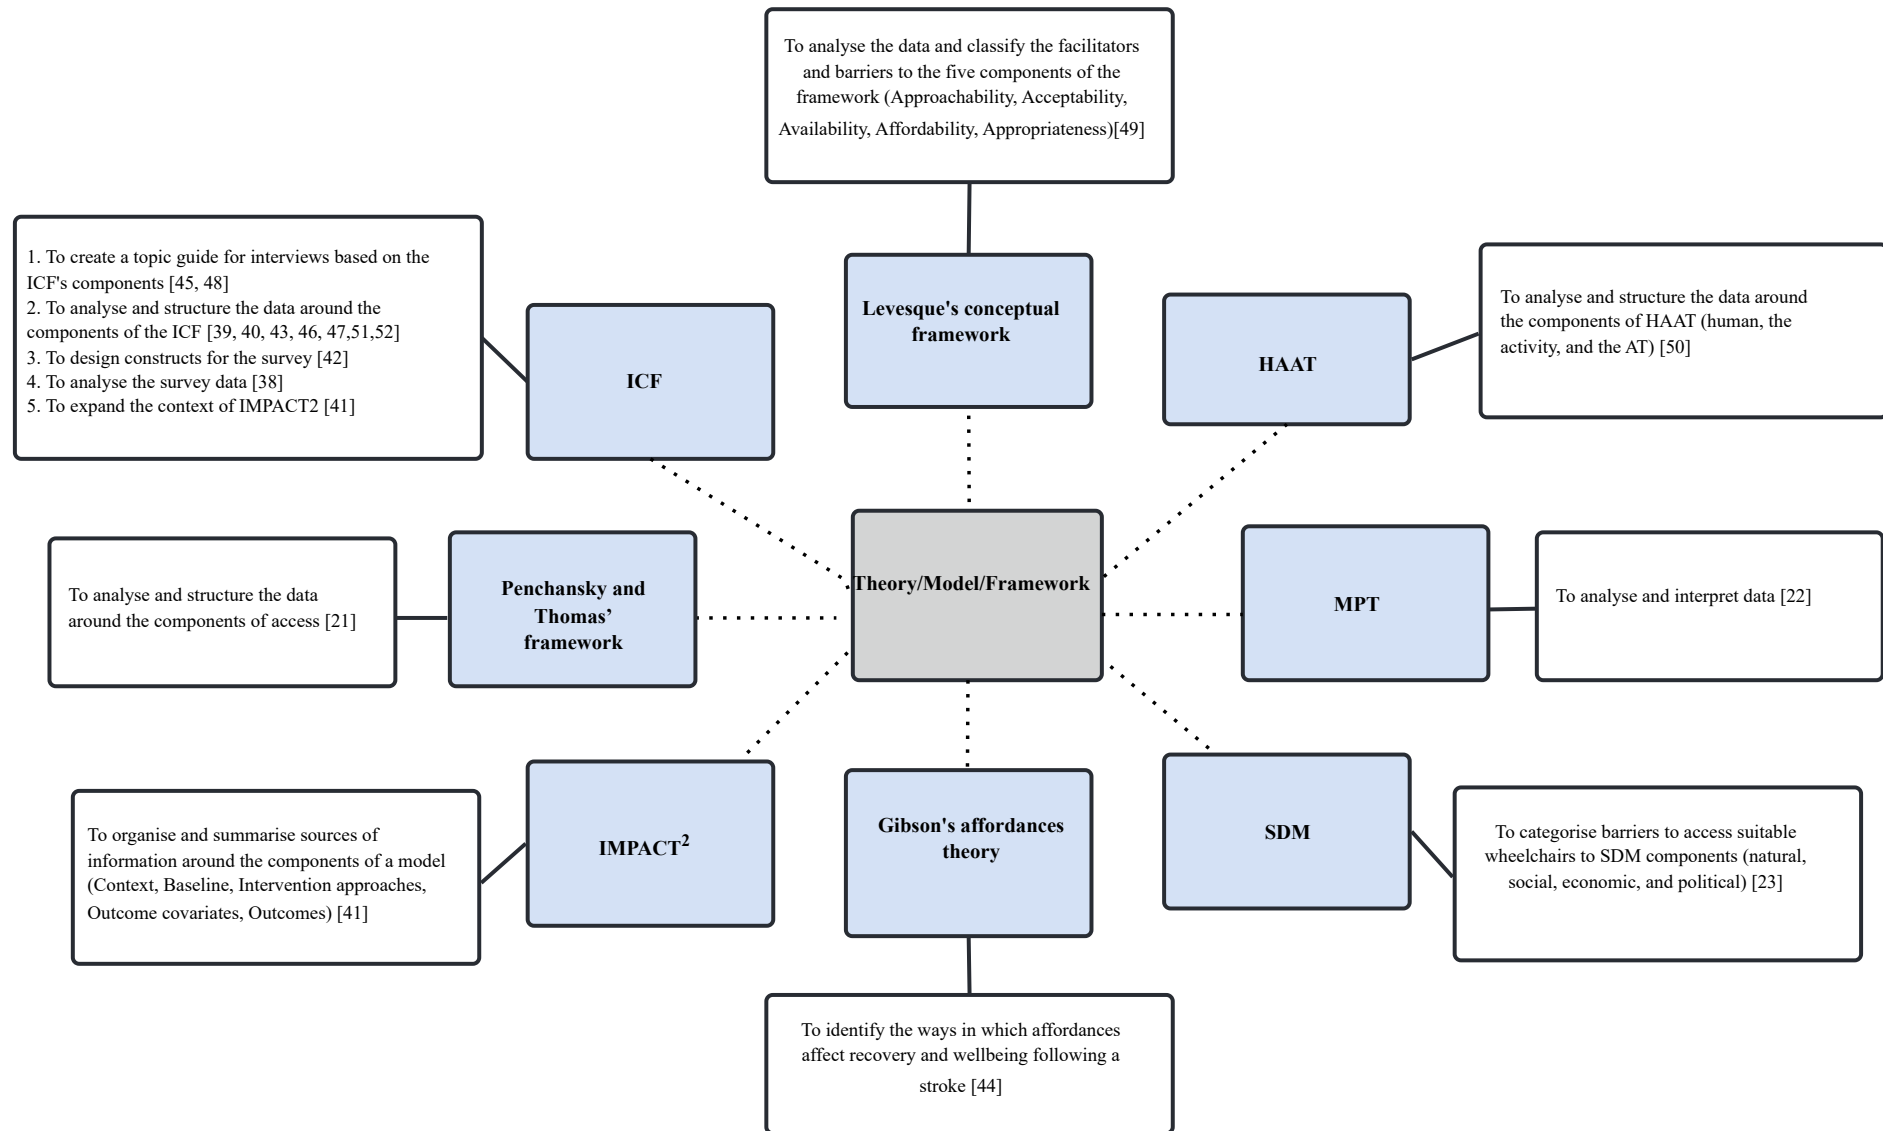

Supplement: bmjopen-2023-080633supp006.pdf [file bmjopen-2023-080633supp006.pdf]
